# Supplementary material for: Deep Learning for Population Genetic Inference
Source: PLoS Comput Biol. 2016 Mar 28;12(3):e1004845. doi: 10.1371/journal.pcbi.1004845 (PMC4809617; doi:10.1371/journal.pcbi.1004845)
Supplement: S3 Table — (XLS) [file pcbi.1004845.s003.xls]

## Sheet: Neutral
2L	14940000	14960000	0	0.867291
2R	8352495	8372495	0	0.859364	FBgn0033283 FBgn0250827 FBgn0033285 FBgn0033287 FBgn0033286 FBgn0050366 FBgn0050362 FBgn0050363 FBgn0050364 FBgn0050365
3R	25874278	25894278	0	0.851968	FBgn0039381 FBgn0028717
2R	24552477	24572477	0	0.847012	FBgn0016687 FBgn0035024 FBgn0035025 FBgn0035026
2R	6912495	6932495	0	0.846386	FBgn0033117
3R	31114278	31134278	0	0.843213	FBgn0039821 FBgn0263412 FBgn0039820 FBgn0261395 FBgn0267926
2R	7312495	7332495	0	0.841895
2R	24652477	24672477	0	0.838417	FBgn0035046 FBgn0085243 FBgn0261373 FBgn0260456 FBgn0050161 FBgn0050163 FBgn0035044 FBgn0035047
2R	7392495	7412495	0	0.837936	FBgn0033164 FBgn0033165 FBgn0262583 FBgn0263529 FBgn0262948 FBgn0033167 FBgn0033166 FBgn0033162 FBgn0265096
3L	3640000	3660000	0	0.837295	FBgn0262544 FBgn0035455
2R	7972495	7992495	0	0.836105	FBgn0033247 FBgn0033246
2R	24592477	24612477	0	0.832719	FBgn0035036 FBgn0035034 FBgn0035031 FBgn0035032 FBgn0035035 FBgn0259707 FBgn0035033 FBgn0259742
2R	23572477	23592477	0	0.826989
2R	14852495	14872495	0	0.825914	FBgn0028434 FBgn0053506 FBgn0033973 FBgn0264962 FBgn0053505 FBgn0033972
3R	9214278	9234278	0	0.823846	FBgn0266706
2R	11072495	11092495	0	0.82325	FBgn0262817 FBgn0262818
2R	7632495	7652495	0	0.822747	FBgn0263046
3R	10154278	10174278	0	0.822626	FBgn0040238 FBgn0037794
2R	14972495	14992495	0	0.822321	FBgn0050241 FBgn0033989 FBgn0033988
3R	26594278	26614278	0	0.82136	FBgn0267438 FBgn0266256
3R	31034278	31054278	0	0.821182	FBgn0263562 FBgn0053920 FBgn0010808 FBgn0053773 FBgn0016123 FBgn0010015
3L	4360000	4380000	0	0.821006	FBgn0035537 FBgn0035534 FBgn0265467 FBgn0053514
3R	21174278	21194278	0	0.818917
2L	5780000	5800000	0	0.815704	FBgn0051913
2R	8132495	8152495	0	0.813444	FBgn0033268
3L	1080000	1100000	0	0.812973
3L	4400000	4420000	0	0.811876	FBgn0035541 FBgn0035540
3R	30714278	30734278	0	0.811352	FBgn0267939 FBgn0039797 FBgn0039798
3L	15566900	15586900	0	0.807747	FBgn0036512 FBgn0036515 FBgn0261109 FBgn0036514
3L	1000000	1020000	0	0.806887	FBgn0267461
3R	26954278	26974278	0	0.806634	FBgn0041224 FBgn0039465
2R	9192495	9212495	0	0.806019	FBgn0262515 FBgn0015561 FBgn0033392
2L	7680000	7700000	0	0.805972	FBgn0031930 FBgn0264997 FBgn0262880 FBgn0031929
3L	4480000	4500000	0	0.804127	FBgn0265920 FBgn0035551 FBgn0035552 FBgn0035554 FBgn0035553
3R	26174278	26194278	0	0.797979	FBgn0039417 FBgn0083966 FBgn0083965 FBgn0051086
3L	2700000	2720000	0	0.797215
2R	8152495	8172495	0	0.794849	FBgn0050297 FBgn0033272 FBgn0264877 FBgn0050374 FBgn0086021 FBgn0033273 FBgn0011659 FBgn0033271 FBgn0021995 FBgn0050373
2R	6932495	6952495	0	0.794265	FBgn0053349 FBgn0011892 FBgn0011893 FBgn0011894 FBgn0011895 FBgn0053348 FBgn0066293
3R	21254278	21274278	0	0.793978	FBgn0267448 FBgn0038876 FBgn0038877 FBgn0043012 FBgn0016700
3L	8266900	8286900	0	0.792652
2L	11600000	11620000	0	0.792358	FBgn0032368
2R	7652495	7672495	0	0.792222	FBgn0050491 FBgn0033202 FBgn0033203 FBgn0050495 FBgn0033204 FBgn0033205 FBgn0033206 FBgn0033207
3L	3560000	3580000	0	0.791014
2R	18152495	18172495	0	0.790933	FBgn0260392 FBgn0034307 FBgn0260401 FBgn0034310 FBgn0022238 FBgn0034308
2R	18532495	18552495	0	0.789915	FBgn0283428 FBgn0085419 FBgn0003067 FBgn0266488
2R	7912495	7932495	0	0.788963	FBgn0015509 FBgn0033234 FBgn0023171 FBgn0033233 FBgn0033232 FBgn0050381 FBgn0026393
2R	14412495	14432495	0	0.788126	FBgn0013725 FBgn0033936
2R	7992495	8012495	0	0.787885	FBgn0013307 FBgn0013308 FBgn0033249 FBgn0027788 FBgn0033248
2R	7672495	7692495	0	0.786233	FBgn0033210 FBgn0033209 FBgn0033208
3R	10134278	10154278	0	0.785761	FBgn0037792 FBgn0085332 FBgn0261817
3L	7866900	7886900	0	0.785454
3R	31354278	31374278	0	0.785158	FBgn0046332
2R	8372495	8392495	0	0.784588
2R	15372495	15392495	0	0.784124	FBgn0262964 FBgn0262965 FBgn0262565 FBgn0000996 FBgn0262815 FBgn0026370
3L	9026900	9046900	0	0.783683	FBgn0028789
2R	6812495	6832495	0	0.782765	FBgn0265635 FBgn0085244
3R	10094278	10114278	0	0.781586	FBgn0262419 FBgn0262459 FBgn0028734
3L	8186900	8206900	0	0.78062	FBgn0035855 FBgn0035853 FBgn0035856 FBgn0035851 FBgn0035852 FBgn0035854
3R	10574278	10594278	0	0.778971
2R	9072495	9092495	0	0.778168	FBgn0267586 FBgn0025709 FBgn0033371 FBgn0010220 FBgn0033372
3L	5486900	5506900	0	0.778016	FBgn0035608 FBgn0265711 FBgn0265712 FBgn0265713
3L	2880000	2900000	0	0.777078	FBgn0265724 FBgn0035379
3R	29694278	29714278	0	0.776834	FBgn0267129
3L	820000	840000	0	0.776472	FBgn0082973 FBgn0083057 FBgn0083058 FBgn0264475 FBgn0086062 FBgn0086063 FBgn0086064 FBgn0086065 FBgn0086066 FBgn0086067 FBgn0260755 FBgn0260756 FBgn0035164 FBgn0035162 FBgn0266694 FBgn0035165
2R	8032495	8052495	0	0.776137
3L	2580000	2600000	0	0.774804	FBgn0261602 FBgn0016794 FBgn0062517 FBgn0028504
3R	10414278	10434278	0	0.77469	FBgn0278600
3R	31554278	31574278	0	0.774453	FBgn0267788 FBgn0267789
2R	22912477	22932477	0	0.774168	FBgn0010660 FBgn0261564 FBgn0050187
3L	14746900	14766900	0	0.774136	FBgn0013263 FBgn0053260 FBgn0260233
3R	29714278	29734278	0	0.772843	FBgn0250832 FBgn0267777 FBgn0039685 FBgn0042213 FBgn0039686 FBgn0085325 FBgn0024841 FBgn0039687 FBgn0039684
2R	7732495	7752495	0	0.771159
3L	440000	460000	0	0.771002
2R	23432477	23452477	0	0.770679	FBgn0026384
3L	6806900	6826900	0	0.770082
3L	1660000	1680000	0	0.769537	FBgn0082944 FBgn0082945 FBgn0082946 FBgn0035254 FBgn0083121 FBgn0035255 FBgn0026372 FBgn0035256
2R	18112495	18132495	0	0.767808	FBgn0003520 FBgn0028983 FBgn0040465
3R	11694278	11714278	0	0.766398	FBgn0267675 FBgn0037939 FBgn0265271 FBgn0025821 FBgn0037940
3L	900000	920000	0	0.7663	FBgn0267919 FBgn0028999 FBgn0035176
2R	8972495	8992495	0	0.764359
2R	24112477	24132477	0	0.763465	FBgn0264298 FBgn0264297 FBgn0264299 FBgn0034978 FBgn0041706
3L	7746900	7766900	0	0.762912	FBgn0035817 FBgn0035816 FBgn0001208
2R	8752495	8772495	0	0.76231	FBgn0265305
3L	7946900	7966900	0	0.761758	FBgn0041156
3L	5326900	5346900	0	0.761625	FBgn0011986 FBgn0267306
2R	6852495	6872495	0	0.761561
2R	24072477	24092477	0	0.761166	FBgn0034973 FBgn0086129 FBgn0034972 FBgn0259209 FBgn0034974
3R	25354278	25374278	0	0.760918	FBgn0039331
2R	7332495	7352495	0	0.76072	FBgn0264880
2R	10692495	10712495	0	0.760661
2R	6832495	6852495	0	0.76033	FBgn0263517 FBgn0265051 FBgn0040674
3R	28834278	28854278	0	0.75977
3R	11354278	11374278	0	0.759758	FBgn0267673 FBgn0267674
3L	1720000	1740000	0	0.758955	FBgn0035263 FBgn0035262 FBgn0035265 FBgn0035264
2R	9172495	9192495	0	0.757417	FBgn0266486 FBgn0033391 FBgn0265311 FBgn0002567
3L	9346900	9366900	0	0.757112	FBgn0085484 FBgn0085485 FBgn0052040 FBgn0035978 FBgn0035980 FBgn0035977 FBgn0052039
2R	17412495	17432495	0	0.756722	FBgn0016697 FBgn0022029 FBgn0034217 FBgn0034214 FBgn0021818 FBgn0025716 FBgn0034215
3L	580000	600000	0	0.756005	FBgn0035144 FBgn0035143 FBgn0035145
2R	9232495	9252495	0	0.755548	FBgn0033395 FBgn0015037 FBgn0033397
3R	13634278	13654278	0	0.755522	FBgn0263396
3R	23614278	23634278	0	0.755368
2R	24532477	24552477	0	0.754415	FBgn0035022
3L	7726900	7746900	0	0.753967	FBgn0035815 FBgn0035813
3L	12006900	12026900	0	0.753671
2R	8812495	8832495	0	0.752904	FBgn0050350
3R	31654278	31674278	0	0.752845
3L	8746900	8766900	0	0.75221	FBgn0265720 FBgn0035924 FBgn0040828
2R	21852495	21872495	0	0.751515	FBgn0034666 FBgn0034667
2R	8832495	8852495	0	0.750915
3L	2360000	2380000	0	0.750894	FBgn0035336 FBgn0035335 FBgn0035332 FBgn0035337 FBgn0035334 FBgn0035333
3L	7826900	7846900	0	0.750375
3L	8426900	8446900	0	0.75032	FBgn0263352
3L	4280000	4300000	0	0.749578	FBgn0015829 FBgn0261952 FBgn0035524 FBgn0035526 FBgn0041630 FBgn0035529 FBgn0035528
3L	2660000	2680000	0	0.749537	FBgn0053234
3R	9234278	9254278	0	0.749221	FBgn0037664 FBgn0000412 FBgn0260935 FBgn0037665
3L	6926900	6946900	0	0.749199	FBgn0266963 FBgn0266964 FBgn0266962 FBgn0035718 FBgn0266961
2R	9252495	9272495	0	0.748996	FBgn0083977
2R	17512495	17532495	0	0.748482	FBgn0034232 FBgn0034230 FBgn0034231
3L	2340000	2360000	0	0.748126
2R	16492495	16512495	0	0.748114	FBgn0034133
3R	15134278	15154278	0	0.747892	FBgn0266064 FBgn0038292 FBgn0038291 FBgn0038290 FBgn0267160
2R	13432495	13452495	0	0.747804	FBgn0011910 FBgn0050509 FBgn0013765 FBgn0019928 FBgn0050065 FBgn0050062
3L	960000	980000	0	0.747322	FBgn0267459 FBgn0267460
3L	3220000	3240000	0	0.747154	FBgn0086068 FBgn0086069 FBgn0086070 FBgn0086071 FBgn0086072 FBgn0035423 FBgn0035425 FBgn0035422 FBgn0035424
2R	7352495	7372495	0	0.745972
3R	24254278	24274278	0	0.745016	FBgn0051130
2R	24672477	24692477	0	0.744726
2R	24572477	24592477	0	0.74464	FBgn0053527 FBgn0035028 FBgn0069913
2R	14432495	14452495	0	0.744362	FBgn0266815
3R	10174278	10194278	0	0.744276
2R	12892495	12912495	0	0.742248	FBgn0267957 FBgn0265654
3R	11454278	11474278	0	0.742075
2R	7712495	7732495	0	0.741428	FBgn0033215 FBgn0033216
3L	15546900	15566900	0	0.741064	FBgn0036509 FBgn0087035 FBgn0036510
2R	20252495	20272495	0	0.740936	FBgn0025720 FBgn0034491 FBgn0005655 FBgn0034493 FBgn0003114 FBgn0264360 FBgn0010411
3L	11046900	11066900	0	0.739349	FBgn0036118 FBgn0052069 FBgn0052075 FBgn0036117 FBgn0266594 FBgn0036116
2R	8992495	9012495	0	0.738901	FBgn0265011
2R	24492477	24512477	0	0.737649	FBgn0035012 FBgn0029501 FBgn0035014 FBgn0015300 FBgn0017556 FBgn0061188
3L	3760000	3780000	0	0.736325
3L	8606900	8626900	0	0.735257	FBgn0035915 FBgn0052351 FBgn0035916
2L	940000	960000	0	0.734887
2R	19652495	19672495	0	0.734834	FBgn0262408 FBgn0262372 FBgn0262380 FBgn0262443 FBgn0262464 FBgn0262418 FBgn0262410 FBgn0262414 FBgn0034464 FBgn0015949 FBgn0265697 FBgn0265144 FBgn0034463 FBgn0265145 FBgn0265143
3L	12986900	13006900	0	0.734302	FBgn0036329
2L	3020000	3040000	0	0.734274	FBgn0031497 FBgn0031496 FBgn0031498 FBgn0031491 FBgn0264996 FBgn0031493 FBgn0031492 FBgn0031494 FBgn0031495 FBgn0243513
2R	9632495	9652495	0	0.733177	FBgn0264879
3R	29094278	29114278	0	0.732907	FBgn0039634 FBgn0266390
2R	13852495	13872495	0	0.732102	FBgn0265498 FBgn0263697 FBgn0033884 FBgn0086356 FBgn0033883 FBgn0033879 FBgn0033880
2R	18132495	18152495	0	0.731986	FBgn0083054 FBgn0083053 FBgn0086600 FBgn0003044 FBgn0062440 FBgn0265297 FBgn0034304
2R	17492495	17512495	0	0.731354	FBgn0050103 FBgn0262720 FBgn0085222
3R	28094278	28114278	0	0.730694
2R	18512495	18532495	0	0.730128	FBgn0262476
2L	15020000	15040000	0	0.729614	FBgn0053310 FBgn0051832 FBgn0001977 FBgn0041713
3L	16466900	16486900	0	0.72952	FBgn0004569
2R	8192495	8212495	0	0.729511	FBgn0033275
2R	24612477	24632477	0	0.729391	FBgn0086030
2R	24092477	24112477	0	0.728936	FBgn0034975
2R	13172495	13192495	0	0.728656	FBgn0028991 FBgn0053137 FBgn0033802
3L	5246900	5266900	0	0.728633
2R	9652495	9672495	0	0.728625	FBgn0011921
3R	15314278	15334278	0	0.7283	FBgn0038318 FBgn0000533 FBgn0013269 FBgn0038319 FBgn0038315 FBgn0026441 FBgn0264832 FBgn0038316
2R	8672495	8692495	0	0.727433	FBgn0011906 FBgn0050354 FBgn0050355
3R	30634278	30654278	0	0.727222	FBgn0051013 FBgn0051015 FBgn0085461 FBgn0085462
3L	1580000	1600000	0	0.726933
3R	11714278	11734278	0	0.726921	FBgn0037941
2R	22992477	23012477	0	0.726725	FBgn0034808
3L	880000	900000	0	0.726497	FBgn0263461 FBgn0263476 FBgn0054056 FBgn0054057
3L	2480000	2500000	0	0.725821	FBgn0035346
2R	20412495	20432495	0	0.725625
2R	10212495	10232495	0	0.725624
3L	15986900	16006900	0	0.724888	FBgn0259824 FBgn0036557 FBgn0036556 FBgn0266995
3R	16634278	16654278	0	0.724534	FBgn0015520 FBgn0038453 FBgn0038454 FBgn0015019 FBgn0038455 FBgn0015351
3L	3000000	3020000	0	0.724404	FBgn0035385 FBgn0052487 FBgn0052488
2R	7792495	7812495	0	0.723907	FBgn0002891 FBgn0003317 FBgn0033225 FBgn0033224
3L	1780000	1800000	0	0.723473	FBgn0035273 FBgn0267468 FBgn0267484 FBgn0011573 FBgn0024510
2R	17572495	17592495	0	0.722943	FBgn0016701 FBgn0034249 FBgn0034247 FBgn0034246 FBgn0029079 FBgn0250868 FBgn0266812 FBgn0266813 FBgn0034248
2R	10052495	10072495	0	0.722576	FBgn0262169 FBgn0033481 FBgn0033480 FBgn0013435 FBgn0033479 FBgn0265344 FBgn0265343 FBgn0010385
3L	9306900	9326900	0	0.722374
3R	30874278	30894278	0	0.722285	FBgn0000416 FBgn0039807 FBgn0039809 FBgn0039808
2R	7752495	7772495	0	0.722172
2R	19812495	19832495	0	0.72181	FBgn0034475
2R	16092495	16112495	0	0.721599	FBgn0265605 FBgn0083983 FBgn0014020 FBgn0034073
3R	10114278	10134278	0	0.721542	FBgn0051477 FBgn0267705 FBgn0266721 FBgn0001321
3L	15606900	15626900	0	0.72148	FBgn0036520 FBgn0036522 FBgn0036519
3R	28854278	28874278	0	0.721259
2R	11052495	11072495	0	0.720989
3R	12034278	12054278	0	0.720558	FBgn0037987 FBgn0037986
3L	2720000	2740000	0	0.720316
3L	7326900	7346900	0	0.719864	FBgn0264302 FBgn0011640 FBgn0002909 FBgn0259203 FBgn0035767 FBgn0035766 FBgn0264303
3R	11334278	11354278	0	0.719758	FBgn0267672 FBgn0026063 FBgn0026064
2R	12072495	12092495	0	0.7197	FBgn0033680
2R	9612495	9632495	0	0.71952	FBgn0262385 FBgn0262172
2R	23852477	23872477	0	0.719029	FBgn0034918 FBgn0025352 FBgn0034919 FBgn0025790 FBgn0025335 FBgn0004581
2L	3280000	3300000	0	0.718917	FBgn0265678 FBgn0031515
2R	14212495	14232495	0	0.718828	FBgn0033913 FBgn0262407 FBgn0033912
3L	14986900	15006900	0	0.718775	FBgn0036461 FBgn0023174 FBgn0036462
3R	20054278	20074278	0	0.718582	FBgn0038771 FBgn0038772
2L	13680000	13700000	0	0.718387
2R	8612495	8632495	0	0.718344	FBgn0022027 FBgn0033313 FBgn0033315 FBgn0033317 FBgn0033316
2R	13932495	13952495	0	0.71795	FBgn0033885
2R	23492477	23512477	0	0.717895	FBgn0034869 FBgn0034870 FBgn0034871 FBgn0264338
3R	27034278	27054278	0	0.716792	FBgn0029170
2R	11852495	11872495	0	0.716356	FBgn0033659 FBgn0085259 FBgn0260437 FBgn0033658 FBgn0260436 FBgn0013756
2R	18432495	18452495	0	0.715526	FBgn0034350 FBgn0050120 FBgn0261119 FBgn0261477
2R	12652495	12672495	0	0.715166	FBgn0033762 FBgn0033763 FBgn0261673
2R	12592495	12612495	0	0.714901	FBgn0027356 FBgn0266817 FBgn0264510
2R	22212495	22232495	0	0.714763	FBgn0025186 FBgn0034715 FBgn0034716 FBgn0050277 FBgn0050278
3R	15954278	15974278	0	0.714732	FBgn0002783 FBgn0038389 FBgn0038390 FBgn0038388 FBgn0052856
2R	8792495	8812495	0	0.713441	FBgn0033330
2R	8492495	8512495	0	0.713406
2R	8332495	8352495	0	0.713333
3L	480000	500000	0	0.71269
3L	1700000	1720000	0	0.711644	FBgn0035258
2R	20812495	20832495	0	0.710812
3L	17406900	17426900	0	0.710698	FBgn0266669 FBgn0040793
3R	15654278	15674278	0	0.710687	FBgn0264431
3L	1600000	1620000	0	0.71037	FBgn0267464 FBgn0035240 FBgn0035239 FBgn0035243 FBgn0035241 FBgn0035238
3L	680000	700000	0	0.710317	FBgn0052483 FBgn0035155 FBgn0035157 FBgn0260862 FBgn0035154 FBgn0035153 FBgn0035152
2R	12572495	12592495	0	0.710033	FBgn0050055
2R	9532495	9552495	0	0.709479	FBgn0033421
2R	22612495	22632495	0	0.707705
3R	26154278	26174278	0	0.70765
3L	500000	520000	0	0.706355	FBgn0267664 FBgn0085297 FBgn0085296
2L	7020000	7040000	0	0.705619	FBgn0031883 FBgn0003046 FBgn0031881 FBgn0031882 FBgn0051908
2R	15032495	15052495	0	0.704778	FBgn0263613
2R	17552495	17572495	0	0.704425	FBgn0034243 FBgn0040294 FBgn0263029 FBgn0263076 FBgn0034242
2R	23472477	23492477	0	0.703958	FBgn0034867 FBgn0264336 FBgn0264337
3R	12174278	12194278	0	0.703556
2R	11572495	11592495	0	0.703342	FBgn0082993 FBgn0086658
2R	18452495	18472495	0	0.703113	FBgn0034352
3R	9074278	9094278	0	0.702938
2R	7012495	7032495	0	0.702647	FBgn0263655 FBgn0263656 FBgn0033127 FBgn0265061
3L	1100000	1120000	0	0.702571
3L	2020000	2040000	0	0.702269	FBgn0259701 FBgn0259702 FBgn0085288 FBgn0259703
2R	14232495	14252495	0	0.701896	FBgn0262427 FBgn0033916 FBgn0033917 FBgn0033915
3L	9086900	9106900	0	0.701789	FBgn0043806 FBgn0040827
2R	12612495	12632495	0	0.701621	FBgn0033757 FBgn0004435 FBgn0266487 FBgn0050054 FBgn0033756
3L	1640000	1660000	0	0.701285	FBgn0025712 FBgn0267465 FBgn0025725 FBgn0035248 FBgn0035249 FBgn0013755 FBgn0035251 FBgn0035252
3L	560000	580000	0	0.701104
2L	5860000	5880000	0	0.700704
3L	9886900	9906900	0	0.7006	FBgn0267535 FBgn0036058 FBgn0036056 FBgn0036057 FBgn0025866 FBgn0036059
2R	20272495	20292495	0	0.700495	FBgn0034498 FBgn0085228 FBgn0034496 FBgn0034499 FBgn0034497 FBgn0034495 FBgn0026136
3R	29254278	29274278	0	0.700399	FBgn0267104
3L	15966900	15986900	0	0.700336	FBgn0000115 FBgn0000212 FBgn0036550 FBgn0036551 FBgn0036553 FBgn0036549 FBgn0036552
2R	11832495	11852495	0	0.700316	FBgn0259832 FBgn0033657 FBgn0262819 FBgn0033656 FBgn0265363
2L	920000	940000	0	0.699707
2L	11580000	11600000	0	0.699524	FBgn0267327 FBgn0028412 FBgn0265689
2R	10912495	10932495	0	0.698994
3L	2180000	2200000	0	0.698916	FBgn0035313 FBgn0026593 FBgn0035315
2R	10092495	10112495	0	0.698427	FBgn0004907 FBgn0001291 FBgn0033485
3R	27674278	27694278	0	0.698178	FBgn0039538 FBgn0003330 FBgn0039537 FBgn0046258 FBgn0051055
3L	4940000	4960000	0	0.69795
3L	7926900	7946900	0	0.697693	FBgn0264472 FBgn0035827
3R	25674278	25694278	0	0.697304	FBgn0039356 FBgn0039358 FBgn0039360 FBgn0039359 FBgn0039357 FBgn0039355 FBgn0266752
2R	22192495	22212495	0	0.697098	FBgn0034711 FBgn0034710 FBgn0034712 FBgn0086027 FBgn0266925
3R	11734278	11754278	0	0.69659	FBgn0037942 FBgn0037943 FBgn0002906 FBgn0262364 FBgn0037944
2R	7872495	7892495	0	0.696414
3R	27914278	27934278	0	0.695657	FBgn0082923 FBgn0039555 FBgn0039557 FBgn0053213 FBgn0003279 FBgn0027579 FBgn0051053 FBgn0039558 FBgn0267126
3R	29774278	29794278	0	0.695387	FBgn0267779 FBgn0039694
3L	8066900	8086900	0	0.695384	FBgn0052363 FBgn0260967 FBgn0260968 FBgn0264705
2R	8212495	8232495	0	0.695355	FBgn0085246 FBgn0265302 FBgn0010109
3R	20794278	20814278	0	0.695315
2R	24052477	24072477	0	0.695229	FBgn0266049 FBgn0034968 FBgn0025806 FBgn0023170 FBgn0034966 FBgn0034967 FBgn0034965 FBgn0034970
3L	15126900	15146900	0	0.694703	FBgn0036482 FBgn0065051 FBgn0036484 FBgn0047178 FBgn0014002 FBgn0036483 FBgn0266945 FBgn0266946
3R	28134278	28154278	0	0.694607	FBgn0267745 FBgn0267749 FBgn0267748 FBgn0267747 FBgn0267746
2R	20232495	20252495	0	0.694088	FBgn0034489 FBgn0011870 FBgn0265835 FBgn0265836 FBgn0034485 FBgn0034487 FBgn0034488 FBgn0034486
3L	980000	1000000	0	0.693816	FBgn0035179
2R	8472495	8492495	0	0.693695
3L	3720000	3740000	0	0.693273
3L	420000	440000	0	0.692789	FBgn0065092 FBgn0035139
3L	3400000	3420000	0	0.692628	FBgn0262260
2R	19472495	19492495	0	0.692137	FBgn0034451 FBgn0034452
2L	10000000	10020000	0	0.690783	FBgn0043456 FBgn0266167 FBgn0032175 FBgn0011584
3L	2600000	2620000	0	0.690421	FBgn0035356
2R	8312495	8332495	0	0.690262
2R	20332495	20352495	0	0.690117	FBgn0034505 FBgn0034506 FBgn0042198
3R	27094278	27114278	0	0.689702	FBgn0039486 FBgn0039483 FBgn0039485 FBgn0243514 FBgn0039487 FBgn0266736
2L	9040000	9060000	0	0.689208
3R	24874278	24894278	0	0.688515	FBgn0043799 FBgn0039241
3R	31634278	31654278	0	0.687933
2R	17532495	17552495	0	0.687835	FBgn0010409 FBgn0263113 FBgn0034237 FBgn0085223 FBgn0028382
3L	4380000	4400000	0	0.687653	FBgn0052240
3R	29114278	29134278	0	0.687543	FBgn0005596 FBgn0039637 FBgn0039636 FBgn0039638
3R	31394278	31414278	0	0.687118	FBgn0039846 FBgn0019990
3L	5406900	5426900	0	0.686164
2R	14012495	14032495	0	0.686079	FBgn0033893
3R	31574278	31594278	0	0.685771	FBgn0039854 FBgn0039855 FBgn0043900 FBgn0003268 FBgn0266700
3L	11926900	11946900	0	0.685307	FBgn0262401 FBgn0036224 FBgn0011723 FBgn0036225
2R	9212495	9232495	0	0.685267	FBgn0265644 FBgn0266847
3L	1740000	1760000	0	0.685188	FBgn0035268 FBgn0035267 FBgn0022702
3R	21774278	21794278	0	0.684997	FBgn0038902 FBgn0266181 FBgn0038903 FBgn0003867
2L	820000	840000	0	0.684978	FBgn0010583 FBgn0031286 FBgn0031285
3L	1200000	1220000	0	0.684858	FBgn0004428 FBgn0004429 FBgn0004427 FBgn0004425 FBgn0035189 FBgn0063667 FBgn0004426
3R	30434278	30454278	0	0.684363	FBgn0039771 FBgn0039770
3L	2800000	2820000	0	0.683751
2R	17592495	17612495	0	0.683405	FBgn0050333 FBgn0050231 FBgn0029006 FBgn0034251 FBgn0261501 FBgn0264541
2R	19452495	19472495	0	0.683389	FBgn0034447 FBgn0002716
2R	21352495	21372495	0	0.683108
2R	24512477	24532477	0	0.683082	FBgn0259185 FBgn0259186 FBgn0050169 FBgn0259187 FBgn0035016 FBgn0035019 FBgn0265154
2R	18172495	18192495	0	0.682756	FBgn0034317 FBgn0034318 FBgn0034315 FBgn0034313 FBgn0034314 FBgn0034312 FBgn0266854
2R	22552495	22572495	0	0.682323	FBgn0034737
3R	18114278	18134278	0	0.681723
3R	24354278	24374278	0	0.681281	FBgn0039194 FBgn0039192 FBgn0261993 FBgn0261994 FBgn0053339 FBgn0053340 FBgn0039193 FBgn0053341 FBgn0039190 FBgn0039189 FBgn0039195 FBgn0039188
3L	2620000	2640000	0	0.680654	FBgn0267644 FBgn0267643 FBgn0267220
3L	12146900	12166900	0	0.679941	FBgn0052099 FBgn0036259
2R	23332477	23352477	0	0.679575	FBgn0085239 FBgn0046253 FBgn0034846
3R	31214278	31234278	0	0.679569	FBgn0263544 FBgn0039829 FBgn0046696 FBgn0039830 FBgn0039832 FBgn0039831
3R	31374278	31394278	0	0.679455	FBgn0039844 FBgn0051204
3L	2140000	2160000	0	0.679371
3L	12766900	12786900	0	0.679322	FBgn0036311 FBgn0036309 FBgn0052106 FBgn0036310
2R	7072495	7092495	0	0.678728
3L	3120000	3140000	0	0.678321	FBgn0052273 FBgn0267469
3R	29134278	29154278	0	0.678207	FBgn0039642 FBgn0039641 FBgn0014869 FBgn0039639 FBgn0039640 FBgn0041588 FBgn0041186
2R	12752495	12772495	0	0.678125	FBgn0086904 FBgn0011227 FBgn0026619 FBgn0026741 FBgn0020930 FBgn0033774
3L	14266900	14286900	0	0.6773
3R	29154278	29174278	0	0.676724	FBgn0039644 FBgn0039645
2R	14512495	14532495	0	0.675836	FBgn0050197 FBgn0033942
2L	17300000	17320000	0	0.67566	FBgn0085199 FBgn0267260
2L	1260000	1280000	0	0.674951
2R	17452495	17472495	0	0.674717	FBgn0034221 FBgn0024196 FBgn0034223 FBgn0263233 FBgn0028953
3R	24674278	24694278	0	0.674572
2R	20212495	20232495	0	0.6745	FBgn0011869 FBgn0266972
2R	11392495	11412495	0	0.674445	FBgn0050506 FBgn0050257 FBgn0054054 FBgn0266573 FBgn0266574 FBgn0033633 FBgn0050026
2R	14832495	14852495	0	0.67439	FBgn0033970 FBgn0033971 FBgn0016684
3L	8526900	8546900	0	0.674026	FBgn0035909
3R	27814278	27834278	0	0.67387
3L	1260000	1280000	0	0.673757
2R	14932495	14952495	0	0.67375	FBgn0033985 FBgn0040747 FBgn0033984
2R	11812495	11832495	0	0.673686	FBgn0033653
2R	12532495	12552495	0	0.673673	FBgn0053752
2R	24472477	24492477	0	0.673204	FBgn0035007 FBgn0035008 FBgn0035009
3R	29674278	29694278	0	0.672942	FBgn0039680 FBgn0039682 FBgn0013972 FBgn0039681
3R	24894278	24914278	0	0.67263	FBgn0039246 FBgn0265253 FBgn0039244 FBgn0040601
3L	9366900	9386900	0	0.672536	FBgn0263493 FBgn0263494 FBgn0001227 FBgn0001223 FBgn0001228 FBgn0035982 FBgn0263492 FBgn0035981 FBgn0011769 FBgn0001224 FBgn0001229 FBgn0001225 FBgn0001226
3L	18806900	18826900	0	0.671349	FBgn0036815
2R	12052495	12072495	0	0.670777	FBgn0028407 FBgn0265373
2R	13752495	13772495	0	0.670714	FBgn0033866
2R	19432495	19452495	0	0.670588	FBgn0003887 FBgn0082987 FBgn0266711 FBgn0013325 FBgn0040273 FBgn0034446
3R	16674278	16694278	0	0.6704
2R	24292477	24312477	0	0.670341	FBgn0263546 FBgn0034999
2R	20692495	20712495	0	0.670127	FBgn0034545
3L	8086900	8106900	0	0.669651	FBgn0035833
2R	19492495	19512495	0	0.669564	FBgn0034454 FBgn0261456 FBgn0050223 FBgn0034457 FBgn0034456 FBgn0040732 FBgn0034455 FBgn0265665
3L	1380000	1400000	0	0.669546	FBgn0052324 FBgn0052328 FBgn0052329 FBgn0011852 FBgn0011853 FBgn0011851
3L	11066900	11086900	0	0.669474	FBgn0010741 FBgn0036121 FBgn0263241 FBgn0036124
3L	8146900	8166900	0	0.669009	FBgn0035845 FBgn0264478 FBgn0259916
3R	18634278	18654278	0	0.668976
3L	15106900	15126900	0	0.668522	FBgn0036479 FBgn0264702 FBgn0052847 FBgn0036481
3L	6946900	6966900	0	0.667425	FBgn0035720 FBgn0029117 FBgn0035721 FBgn0261445 FBgn0035722
2R	11992495	12012495	0	0.667368	FBgn0266857 FBgn0266858
3L	6726900	6746900	0	0.667346	FBgn0261934 FBgn0266966
2R	9492495	9512495	0	0.667241	FBgn0004360
3L	9966900	9986900	0	0.667214	FBgn0026404 FBgn0263251 FBgn0259932 FBgn0036063
2R	9452495	9472495	0	0.666211	FBgn0053758 FBgn0053757
2R	23692477	23712477	0	0.666184	FBgn0013548 FBgn0002174 FBgn0016762 FBgn0034893 FBgn0011297 FBgn0034894 FBgn0266865
2L	3000000	3020000	0	0.665856	FBgn0031489
3R	16654278	16674278	0	0.665322
3L	2780000	2800000	0	0.665184	FBgn0035374 FBgn0035375
3R	28274278	28294278	0	0.664829	FBgn0085466 FBgn0002865 FBgn0004171 FBgn0085465
2R	6552495	6572495	0	0.664539
3L	600000	620000	0	0.664536	FBgn0016715 FBgn0265706 FBgn0261636
3L	16966900	16986900	0	0.663996
3L	11646900	11666900	0	0.663864	FBgn0262437 FBgn0036188
2R	16312495	16332495	0	0.663461	FBgn0034114 FBgn0050096 FBgn0034113
3R	21334278	21354278	0	0.661949
3R	15854278	15874278	0	0.661003	FBgn0038377
2L	5120000	5140000	0	0.660541
3R	11014278	11034278	0	0.660132	FBgn0267671
2L	8480000	8500000	0	0.660058	FBgn0051892 FBgn0051896 FBgn0263489 FBgn0264340 FBgn0032047 FBgn0263314 FBgn0032049
2L	11240000	11260000	0	0.660053
2R	22672495	22692495	0	0.65989	FBgn0265982 FBgn0020257 FBgn0265983 FBgn0265984 FBgn0265985
2R	12772495	12792495	0	0.659293	FBgn0266804
2L	7380000	7400000	0	0.659262	FBgn0264888 FBgn0031905 FBgn0031906 FBgn0031904
3R	31674278	31694278	0	0.657785	FBgn0039864 FBgn0264900 FBgn0267125 FBgn0267124
3L	10006900	10026900	0	0.657646
3L	1760000	1780000	0	0.657277	FBgn0027903 FBgn0035272 FBgn0035271 FBgn0035270 FBgn0265451
3L	800000	820000	0	0.657002	FBgn0265730 FBgn0035161
3R	14134278	14154278	0	0.656896	FBgn0038209 FBgn0260226 FBgn0038208
3L	4580000	4600000	0	0.656849
2R	8052495	8072495	0	0.656579	FBgn0040778
3L	15526900	15546900	0	0.656241	FBgn0053983 FBgn0261681 FBgn0262893 FBgn0261682
2R	23452477	23472477	0	0.656041	FBgn0034863 FBgn0034865
2R	9692495	9712495	0	0.655766	FBgn0265338 FBgn0033439 FBgn0260474 FBgn0033440
2R	22532495	22552495	0	0.655716	FBgn0034736
2L	16460000	16480000	0	0.655379
2R	19992495	20012495	0	0.654357	FBgn0053538 FBgn0050212 FBgn0265839 FBgn0034480
3R	15774278	15794278	0	0.654271	FBgn0038359 FBgn0000246 FBgn0038360 FBgn0038361 FBgn0038363 FBgn0038358 FBgn0266734
3R	29794278	29814278	0	0.654179	FBgn0019972 FBgn0039698 FBgn0262112 FBgn0039697 FBgn0039696 FBgn0002924
3L	4860000	4880000	0	0.654149
3R	19474278	19494278	0	0.654054	FBgn0038709
2L	7760000	7780000	0	0.653725	FBgn0031945 FBgn0020880
2R	13092495	13112495	0	0.653622	FBgn0265429
3L	11286900	11306900	0	0.653587	FBgn0036152
3R	25894278	25914278	0	0.6535	FBgn0039387 FBgn0051089 FBgn0039386 FBgn0262904 FBgn0051091
3L	8826900	8846900	0	0.652164	FBgn0052026 FBgn0267473
3R	11914278	11934278	0	0.651873	FBgn0037964
2L	6620000	6640000	0	0.651682	FBgn0051634 FBgn0085374
2R	13832495	13852495	0	0.651613	FBgn0033874 FBgn0033876 FBgn0033875 FBgn0050484 FBgn0033873
2L	1920000	1940000	0	0.651245	FBgn0011859
3R	16094278	16114278	0	0.65021	FBgn0010379
2R	9272495	9292495	0	0.650121	FBgn0026326 FBgn0033400 FBgn0033401 FBgn0266625
2R	7152495	7172495	0	0.649776	FBgn0002930 FBgn0044011
2R	24232477	24252477	0	0.64975	FBgn0086029 FBgn0266074 FBgn0034994
2R	18552495	18572495	0	0.649354
2R	12672495	12692495	0	0.64925	FBgn0033767 FBgn0050053 FBgn0050052 FBgn0033766
3L	13426900	13446900	0	0.648225	FBgn0012009 FBgn0012010 FBgn0036362 FBgn0036364 FBgn0036361 FBgn0036360 FBgn0036363
2R	9332495	9352495	0	0.648045	FBgn0033404
3R	19234278	19254278	0	0.647849	FBgn0038694
3R	11994278	12014278	0	0.647425	FBgn0260746 FBgn0037978
3L	6626900	6646900	0	0.646718	FBgn0266773 FBgn0266774
3R	24654278	24674278	0	0.646552	FBgn0262431 FBgn0051126 FBgn0039215 FBgn0020018
3L	12506900	12526900	0	0.645952	FBgn0262524 FBgn0020388 FBgn0041775 FBgn0002466 FBgn0266678 FBgn0004926
2R	23592477	23612477	0	0.645684	FBgn0067903 FBgn0034882 FBgn0260455 FBgn0260762 FBgn0260761 FBgn0262845 FBgn0034884
3R	22434278	22454278	0	0.645505	FBgn0085317 FBgn0038968
3L	11986900	12006900	0	0.645415	FBgn0036237 FBgn0036236 FBgn0026432 FBgn0036239
3R	10434278	10454278	0	0.645407	FBgn0037817
3R	17614278	17634278	0	0.645262	FBgn0038531 FBgn0011944 FBgn0053534 FBgn0051569 FBgn0051570 FBgn0051573 FBgn0051591 FBgn0012002 FBgn0011994 FBgn0011993 FBgn0011945 FBgn0011840 FBgn0038530 FBgn0038528 FBgn0038529 FBgn0038527
3L	2540000	2560000	0	0.645059
3L	15686900	15706900	0	0.644984	FBgn0041160 FBgn0085480
2R	24332477	24352477	0	0.644874	FBgn0266047 FBgn0265309
3R	27234278	27254278	0	0.644714	FBgn0267754 FBgn0005696 FBgn0039500 FBgn0042111 FBgn0039498 FBgn0010441 FBgn0039501
3L	13866900	13886900	0	0.644537	FBgn0036382
3R	11674278	11694278	0	0.644323	FBgn0037935 FBgn0037931 FBgn0037933 FBgn0042110 FBgn0037936 FBgn0037934 FBgn0011290
2L	6900000	6920000	0	0.644159	FBgn0262205 FBgn0263467 FBgn0011737 FBgn0031868 FBgn0042092 FBgn0026196 FBgn0052829
3R	27374278	27394278	0	0.644063
2L	8960000	8980000	0	0.64306	FBgn0052985 FBgn0052984 FBgn0032082 FBgn0032083
3L	13966900	13986900	0	0.643014	FBgn0001216 FBgn0036390
2R	12092495	12112495	0	0.641883
2R	23832477	23852477	0	0.641326	FBgn0267590 FBgn0021895 FBgn0086659 FBgn0034913 FBgn0266040 FBgn0034914 FBgn0034915 FBgn0003401
2R	16012495	16032495	0	0.641195	FBgn0010590 FBgn0034065 FBgn0034067 FBgn0034069 FBgn0034068 FBgn0034066
2R	16332495	16352495	0	0.641106	FBgn0034118 FBgn0010611 FBgn0262560 FBgn0034117 FBgn0034120
3R	10994278	11014278	0	0.641062
2R	9592495	9612495	0	0.640785	FBgn0050005 FBgn0050338 FBgn0033434 FBgn0050340 FBgn0050339 FBgn0033437 FBgn0265312 FBgn0050000
3L	6266900	6286900	0	0.640434	FBgn0262787
2R	11252495	11272495	0	0.640415	FBgn0033598 FBgn0033602 FBgn0033599 FBgn0033601 FBgn0033600
2R	22312495	22332495	0	0.640338	FBgn0265979 FBgn0085236 FBgn0013272 FBgn0017482 FBgn0265977
3L	9226900	9246900	0	0.640128	FBgn0035970
2R	20292495	20312495	0	0.640014	FBgn0265849 FBgn0265850 FBgn0265851 FBgn0265852 FBgn0034500
3L	460000	480000	0	0.639748
3L	3420000	3440000	0	0.639578
2R	10472495	10492495	0	0.639413	FBgn0264817 FBgn0033529 FBgn0033528 FBgn0266627
3R	12874278	12894278	0	0.639267	FBgn0038089 FBgn0265166
2L	13880000	13900000	0	0.639151
3L	1540000	1560000	0	0.638844	FBgn0035231 FBgn0267463 FBgn0041342 FBgn0035233 FBgn0035232 FBgn0052313
2L	2600000	2620000	0	0.638409	FBgn0031440 FBgn0266024
2R	19412495	19432495	0	0.637975	FBgn0050326 FBgn0050225 FBgn0263464 FBgn0028981 FBgn0012051
3L	11446900	11466900	0	0.637935	FBgn0036161 FBgn0036160 FBgn0036162
3L	5886900	5906900	0	0.637503	FBgn0035644 FBgn0035645 FBgn0052409 FBgn0052412 FBgn0052413 FBgn0035647
3L	13026900	13046900	0	0.637426	FBgn0082967 FBgn0082966 FBgn0266650 FBgn0086601 FBgn0083978 FBgn0036340 FBgn0036341 FBgn0266682 FBgn0011284
2R	9752495	9772495	0	0.637367	FBgn0005614 FBgn0033442 FBgn0265103
3R	29514278	29534278	0	0.637271	FBgn0039669
3L	2640000	2660000	0	0.637091	FBgn0035358 FBgn0035359 FBgn0035360 FBgn0259199 FBgn0259200 FBgn0027082
2R	20912495	20932495	0	0.63674
2R	10672495	10692495	0	0.636637
2R	12732495	12752495	0	0.636401
3L	8286900	8306900	0	0.63626	FBgn0035868 FBgn0015793 FBgn0035865 FBgn0035867 FBgn0035866 FBgn0087039
3R	17994278	18014278	0	0.63584
3L	5786900	5806900	0	0.635382	FBgn0035638 FBgn0259167 FBgn0086694
2R	11312495	11332495	0	0.635268	FBgn0026385
3R	18694278	18714278	0	0.635253	FBgn0085311 FBgn0267658
3L	2200000	2220000	0	0.635043	FBgn0035316
2R	10892495	10912495	0	0.634726	FBgn0033569 FBgn0033571 FBgn0033573 FBgn0033570 FBgn0033572 FBgn0017414
3R	15254278	15274278	0	0.63469	FBgn0016691 FBgn0038311 FBgn0014879 FBgn0038312 FBgn0263740 FBgn0263755
3R	24234278	24254278	0	0.634525	FBgn0039175 FBgn0261452
3R	22474278	22494278	0	0.634392	FBgn0263554 FBgn0038978 FBgn0038979 FBgn0003676 FBgn0038977 FBgn0038976
3L	8046900	8066900	0	0.634027	FBgn0052359 FBgn0052358 FBgn0052360 FBgn0052361 FBgn0052362 FBgn0267527 FBgn0267528 FBgn0026263
3R	25794278	25814278	0	0.633756	FBgn0263625 FBgn0264429 FBgn0039373 FBgn0039374 FBgn0011273 FBgn0250831 FBgn0267212
2R	14252495	14272495	0	0.633726	FBgn0001220 FBgn0027538 FBgn0261270 FBgn0033918 FBgn0033919
2R	12012495	12032495	0	0.633669	FBgn0267728 FBgn0259985 FBgn0265365
2R	17432495	17452495	0	0.633601	FBgn0034218 FBgn0034219
3L	4740000	4760000	0	0.633407	FBgn0035572 FBgn0267645 FBgn0267646 FBgn0035571 FBgn0264473 FBgn0264474
3L	6246900	6266900	0	0.633171	FBgn0035697 FBgn0265715 FBgn0001258
2R	7372495	7392495	0	0.633148	FBgn0033160 FBgn0000352
3L	7966900	7986900	0	0.633076	FBgn0010406 FBgn0035830 FBgn0035831 FBgn0035829 FBgn0027554
2R	14352495	14372495	0	0.632962	FBgn0033927 FBgn0033928 FBgn0033929 FBgn0085471 FBgn0085472 FBgn0085473 FBgn0033926 FBgn0033925 FBgn0085213 FBgn0050067
3L	6466900	6486900	0	0.632441
2L	1020000	1040000	0	0.63224	FBgn0031296 FBgn0031295
3L	3500000	3520000	0	0.63164	FBgn0001254
3R	28474278	28494278	0	0.631345	FBgn0039585
3R	24014278	24034278	0	0.631047	FBgn0039139
3L	8386900	8406900	0	0.6309	FBgn0035887 FBgn0035886 FBgn0035888 FBgn0035889 FBgn0053057
2R	7412495	7432495	0	0.630402	FBgn0265098 FBgn0033168 FBgn0265097
3R	27474278	27494278	0	0.63035	FBgn0039520 FBgn0039519
3L	8506900	8526900	0	0.629468	FBgn0035901 FBgn0035907 FBgn0035904 FBgn0086348 FBgn0035906 FBgn0035903 FBgn0035902 FBgn0035900
2R	22792495	22812495	0	0.629171	FBgn0011211 FBgn0000405
3R	25214278	25234278	0	0.628824	FBgn0039291 FBgn0039294 FBgn0051106 FBgn0051103 FBgn0039293
2R	8452495	8472495	0	0.628561	FBgn0002569 FBgn0033294 FBgn0050359 FBgn0002571 FBgn0050360 FBgn0033296
3R	22674278	22694278	0	0.628263	FBgn0046114 FBgn0039002 FBgn0039003
3R	10454278	10474278	0	0.628256	FBgn0266260 FBgn0266244
2R	24412477	24432477	0	0.627525	FBgn0259210 FBgn0259729 FBgn0035003
3R	11514278	11534278	0	0.627309
3L	12866900	12886900	0	0.62719
2R	10272495	10292495	0	0.627144
2R	13772495	13792495	0	0.626709	FBgn0264358 FBgn0033868
3L	7446900	7466900	0	0.626533	FBgn0035785 FBgn0053278
2R	7892495	7912495	0	0.626345
3L	13366900	13386900	0	0.626113	FBgn0036352 FBgn0267546 FBgn0036350 FBgn0036349 FBgn0001256 FBgn0036351
2R	9012495	9032495	0	0.625768	FBgn0033364 FBgn0033365 FBgn0033363
2L	1720000	1740000	0	0.625664	FBgn0031360 FBgn0000579 FBgn0031361 FBgn0260648
3L	11726900	11746900	0	0.625426	FBgn0052088 FBgn0052087
2R	23552477	23572477	0	0.625339	FBgn0034880 FBgn0034879 FBgn0015277 FBgn0050184
3L	7406900	7426900	0	0.624873	FBgn0265718
2R	10852495	10872495	0	0.624673	FBgn0265348 FBgn0266629
2L	15400000	15420000	0	0.624669	FBgn0266163 FBgn0266914
3L	16906900	16926900	0	0.624541	FBgn0036676
2R	12812495	12832495	0	0.624501
2R	16772495	16792495	0	0.6244	FBgn0034157 FBgn0053544 FBgn0011743 FBgn0034158 FBgn0010213
3R	28214278	28234278	0	0.624362
2R	23892477	23912477	0	0.624052	FBgn0267588 FBgn0266041 FBgn0034923 FBgn0034925 FBgn0034924 FBgn0015268 FBgn0034928 FBgn0263667
3L	15666900	15686900	0	0.623063	FBgn0036528 FBgn0036529 FBgn0036527
3L	7426900	7446900	0	0.622917	FBgn0052382 FBgn0014011 FBgn0035782 FBgn0052383
3R	26134278	26154278	0	0.622758
3L	5806900	5826900	0	0.622493	FBgn0035639 FBgn0035640
2R	6532495	6552495	0	0.622069	FBgn0264506
3R	21854278	21874278	0	0.621581	FBgn0067317 FBgn0051174 FBgn0038909 FBgn0260940 FBgn0051431 FBgn0267205 FBgn0267204
2L	580000	600000	0	0.621572	FBgn0267827 FBgn0010323
2R	14492495	14512495	0	0.621548	FBgn0024698 FBgn0261823
3R	25934278	25954278	0	0.62097
3R	27754278	27774278	0	0.620905
3R	11534278	11554278	0	0.620373	FBgn0266416
3L	700000	720000	0	0.619996	FBgn0265707 FBgn0035158 FBgn0266960 FBgn0035159 FBgn0025676
2R	24192477	24212477	0	0.619666	FBgn0034990 FBgn0034988 FBgn0034989
3L	4180000	4200000	0	0.619521	FBgn0040697 FBgn0003710 FBgn0028664
3R	18074278	18094278	0	0.619492	FBgn0038566
3R	24954278	24974278	0	0.61947
3R	24174278	24194278	0	0.618958	FBgn0266282 FBgn0029503 FBgn0039163
2R	11592495	11612495	0	0.618761
2L	8040000	8060000	0	0.618353	FBgn0065055 FBgn0031979 FBgn0031981 FBgn0031980
3R	12054278	12074278	0	0.61803	FBgn0037988
3L	16526900	16546900	0	0.617632	FBgn0036638
2L	9640000	9660000	0	0.616652	FBgn0053299
2L	10540000	10560000	0	0.616649	FBgn0265829
3R	22414278	22434278	0	0.616505	FBgn0038964 FBgn0038965 FBgn0038966
2R	14632495	14652495	0	0.616422	FBgn0033950 FBgn0261632 FBgn0033951 FBgn0262881
3L	12486900	12506900	0	0.616217	FBgn0264848 FBgn0036291 FBgn0036290 FBgn0264460 FBgn0036292 FBgn0036289 FBgn0267241 FBgn0267242
3L	3780000	3800000	0	0.615772	FBgn0052266
3L	8566900	8586900	0	0.615379	FBgn0262387 FBgn0264511 FBgn0035911
3L	5706900	5726900	0	0.614435	FBgn0265714 FBgn0086073
2R	15052495	15072495	0	0.614147	FBgn0053467
2L	6960000	6980000	0	0.613737	FBgn0016978 FBgn0031878 FBgn0031877 FBgn0262616 FBgn0264922 FBgn0021944
3L	5000000	5020000	0	0.613616	FBgn0035585
3L	13606900	13626900	0	0.613245	FBgn0262415
3R	15194278	15214278	0	0.612862	FBgn0038301 FBgn0028984 FBgn0260659 FBgn0038299 FBgn0038300
2R	11912495	11932495	0	0.61277	FBgn0265371 FBgn0265364
3R	19774278	19794278	0	0.612542	FBgn0012004 FBgn0051215 FBgn0038731 FBgn0038732 FBgn0038733 FBgn0038734
2L	600000	620000	0	0.612147	FBgn0031270 FBgn0263658 FBgn0263657
2R	20312495	20332495	0	0.612052	FBgn0027529 FBgn0034502 FBgn0034504 FBgn0034503 FBgn0265853
2L	9420000	9440000	0	0.611934	FBgn0262036 FBgn0011232 FBgn0032119 FBgn0085211 FBgn0032117 FBgn0000640
2R	8632495	8652495	0	0.611925	FBgn0265308
3L	3740000	3760000	0	0.611553	FBgn0035458
3R	24974278	24994278	0	0.611351
3R	28874278	28894278	0	0.610824	FBgn0039611 FBgn0039613 FBgn0039612 FBgn0027578
3R	19174278	19194278	0	0.609914	FBgn0038685 FBgn0267706 FBgn0038686
3R	21094278	21114278	0	0.609503	FBgn0028468 FBgn0267712 FBgn0266674 FBgn0038855 FBgn0038854
2L	12100000	12120000	0	0.609306	FBgn0029137 FBgn0263234 FBgn0263235 FBgn0027081 FBgn0015797
2R	18872495	18892495	0	0.609165
2L	6480000	6500000	0	0.608896	FBgn0027496 FBgn0051638 FBgn0031826 FBgn0031824 FBgn0031822 FBgn0031821 FBgn0031820 FBgn0267019
2R	9672495	9692495	0	0.60836
3R	28454278	28474278	0	0.608291
2R	10332495	10352495	0	0.608133	FBgn0262836 FBgn0262791
2L	6600000	6620000	0	0.607954	FBgn0266218 FBgn0031836
2L	6700000	6720000	0	0.607599	FBgn0031851 FBgn0025595
2R	10492495	10512495	0	0.607497
2R	23992477	24012477	0	0.607447	FBgn0262435
3R	19154278	19174278	0	0.607335	FBgn0259704 FBgn0010768 FBgn0002962 FBgn0259705
3L	12026900	12046900	0	0.607084	FBgn0263647 FBgn0036242 FBgn0264726 FBgn0264725
2R	16352495	16372495	0	0.606826	FBgn0034121 FBgn0050098 FBgn0034122 FBgn0263335 FBgn0266861
2R	23032477	23052477	0	0.606765
2R	23792477	23812477	0	0.606277	FBgn0034906 FBgn0010278 FBgn0034907 FBgn0034908 FBgn0028411 FBgn0050177
3R	13174278	13194278	0	0.605727	FBgn0038122 FBgn0038124 FBgn0038125 FBgn0038123
3R	23894278	23914278	0	0.605367
3L	3320000	3340000	0	0.604675	FBgn0052274 FBgn0052268 FBgn0035440 FBgn0035438 FBgn0035439 FBgn0035437 FBgn0266929
2L	12820000	12840000	0	0.602445
3L	12746900	12766900	0	0.602372	FBgn0036305 FBgn0036306
3R	29214278	29234278	0	0.60214	FBgn0262404 FBgn0262448 FBgn0062442 FBgn0051044 FBgn0039655 FBgn0029176 FBgn0039654
2R	12432495	12452495	0	0.602016	FBgn0050334 FBgn0050051
2R	11892495	11912495	0	0.601383	FBgn0033665 FBgn0015543 FBgn0260959
3R	21054278	21074278	0	0.601115	FBgn0000083 FBgn0003257 FBgn0025865
3L	1120000	1140000	0	0.601105
3R	21434278	21454278	0	0.60038	FBgn0264898 FBgn0011278
3R	9934278	9954278	0	0.600059
3L	4240000	4260000	0	0.599586	FBgn0035515 FBgn0035518 FBgn0011692 FBgn0035517 FBgn0041171 FBgn0267302
2L	11280000	11300000	0	0.599166	FBgn0032359 FBgn0265071 FBgn0032358 FBgn0020270 FBgn0263328
2R	19512495	19532495	0	0.599154
3L	3460000	3480000	0	0.599124	FBgn0010317 FBgn0052267 FBgn0035449 FBgn0041164
3R	27174278	27194278	0	0.599031
3R	15274278	15294278	0	0.598995	FBgn0027378 FBgn0038313 FBgn0267750 FBgn0266745 FBgn0011476
3R	31594278	31614278	0	0.598062	FBgn0039858 FBgn0039857
3R	28814278	28834278	0	0.598013	FBgn0039602 FBgn0024273 FBgn0039601
3L	13446900	13466900	0	0.597851	FBgn0036368 FBgn0036366 FBgn0036367
3R	25094278	25114278	0	0.597733	FBgn0054027 FBgn0004898 FBgn0053096 FBgn0053095 FBgn0266534 FBgn0039277
2R	13512495	13532495	0	0.597318	FBgn0033851 FBgn0033848 FBgn0033850
2R	23232477	23252477	0	0.597057	FBgn0034837 FBgn0040063 FBgn0034835
3L	15946900	15966900	0	0.596934	FBgn0036547 FBgn0036546 FBgn0036545
3L	10446900	10466900	0	0.596734	FBgn0052061 FBgn0011802
3R	22834278	22854278	0	0.596593	FBgn0264428 FBgn0039029
3L	7566900	7586900	0	0.596358
2L	13480000	13500000	0	0.596314
2R	24372477	24392477	0	0.596203	FBgn0035000 FBgn0053537 FBgn0000037 FBgn0266048
2R	22232495	22252495	0	0.596106	FBgn0265976
3R	25434278	25454278	0	0.595649
2R	7552495	7572495	0	0.595204	FBgn0004132 FBgn0050499
2R	8592495	8612495	0	0.595167	FBgn0033308 FBgn0033309 FBgn0267792
2R	7772495	7792495	0	0.594999	FBgn0000337 FBgn0263558 FBgn0015614 FBgn0033221 FBgn0266577 FBgn0033222
3L	1460000	1480000	0	0.594415	FBgn0028567 FBgn0266116 FBgn0004635 FBgn0052319
3L	14426900	14446900	0	0.594155
2R	9392495	9412495	0	0.594002	FBgn0028473 FBgn0053774 FBgn0016970 FBgn0033408
2R	20172495	20192495	0	0.593877
2L	16180000	16200000	0	0.593608	FBgn0265948 FBgn0265947
2R	9552495	9572495	0	0.593541	FBgn0263660 FBgn0033422 FBgn0262447 FBgn0033423 FBgn0266819
2R	8652495	8672495	0	0.593537
3R	25754278	25774278	0	0.593529
3R	30274278	30294278	0	0.593471
3L	5846900	5866900	0	0.59347
2R	11492495	11512495	0	0.593244
2L	500000	520000	0	0.593097	FBgn0267992
2R	22632495	22652495	0	0.593096	FBgn0034748 FBgn0261596 FBgn0026261 FBgn0085474 FBgn0085475 FBgn0050195 FBgn0034750 FBgn0019949 FBgn0040091 FBgn0034755 FBgn0034753
2R	15852495	15872495	0	0.592992	FBgn0034047 FBgn0050085 FBgn0022160
2R	15152495	15172495	0	0.592964	FBgn0264379
2R	23252477	23272477	0	0.592904	FBgn0034838 FBgn0034839
3L	15506900	15526900	0	0.59208	FBgn0028377 FBgn0262689 FBgn0004052 FBgn0036504 FBgn0004228 FBgn0001099 FBgn0000565 FBgn0053985 FBgn0053986 FBgn0036505 FBgn0036503
3R	9194278	9214278	0	0.592048
3L	9606900	9626900	0	0.591678	FBgn0267348
3R	31294278	31314278	0	0.591638	FBgn0039840
3L	16006900	16026900	0	0.591548	FBgn0264600 FBgn0267660 FBgn0264601
2L	3500000	3520000	0	0.591393	FBgn0051954 FBgn0031544 FBgn0031545 FBgn0266837 FBgn0266838 FBgn0053123
3L	4760000	4780000	0	0.59128
2L	14600000	14620000	0	0.591114	FBgn0000055 FBgn0000056 FBgn0263330
3R	16614278	16634278	0	0.590977	FBgn0262233 FBgn0038451 FBgn0038450 FBgn0038449 FBgn0038452
3R	15334278	15354278	0	0.590903	FBgn0261679 FBgn0038321 FBgn0266722 FBgn0261680 FBgn0051301 FBgn0019925 FBgn0021750 FBgn0038324
3L	14786900	14806900	0	0.590511	FBgn0001120 FBgn0036451 FBgn0029148
3R	29474278	29494278	0	0.590448	FBgn0039665 FBgn0040623 FBgn0039666 FBgn0039664 FBgn0039663
3R	26914278	26934278	0	0.590446
3R	22574278	22594278	0	0.590414	FBgn0014949 FBgn0038989 FBgn0028837 FBgn0053107 FBgn0024558
3R	16414278	16434278	0	0.590105	FBgn0051497 FBgn0051282 FBgn0051279 FBgn0267191
3L	3800000	3820000	0	0.589877	FBgn0015585 FBgn0264553 FBgn0004888 FBgn0052263 FBgn0035464 FBgn0052262 FBgn0266394 FBgn0035462 FBgn0035461
2R	15272495	15292495	0	0.589532
3R	24994278	25014278	0	0.5892
3L	2160000	2180000	0	0.589051	FBgn0035312 FBgn0035311 FBgn0035309 FBgn0026570
2R	13872495	13892495	0	0.588971
3L	4540000	4560000	0	0.588835	FBgn0053777 FBgn0035558
3L	15086900	15106900	0	0.588622	FBgn0036476 FBgn0027088 FBgn0264703 FBgn0264704
2R	9572495	9592495	0	0.588411	FBgn0033428 FBgn0025286 FBgn0033431 FBgn0267990 FBgn0033429 FBgn0033427 FBgn0033426
3R	19214278	19234278	0	0.5884	FBgn0267975 FBgn0038691 FBgn0038690 FBgn0038692
2L	11940000	11960000	0	0.587692	FBgn0263107 FBgn0005664 FBgn0032385
2R	22692495	22712495	0	0.587637	FBgn0034770 FBgn0034766 FBgn0034769 FBgn0050259 FBgn0263992 FBgn0034768 FBgn0005631
3L	13166900	13186900	0	0.587309	FBgn0086916
3L	4200000	4220000	0	0.587267	FBgn0035508 FBgn0035513 FBgn0035512 FBgn0035511 FBgn0035510
3R	27654278	27674278	0	0.587131	FBgn0002772
3L	6706900	6726900	0	0.58711	FBgn0005626 FBgn0265716
2R	24132477	24152477	0	0.587109	FBgn0021875 FBgn0266073 FBgn0034982
3L	3280000	3300000	0	0.587012	FBgn0262269 FBgn0035430 FBgn0035429
3L	15146900	15166900	0	0.586591	FBgn0036485 FBgn0036487 FBgn0036488 FBgn0036489 FBgn0036486
3R	18394278	18414278	0	0.586415	FBgn0264816 FBgn0038619 FBgn0051122 FBgn0038621 FBgn0038617 FBgn0264751
2L	1180000	1200000	0	0.58602	FBgn0031322 FBgn0263080 FBgn0031321 FBgn0031320 FBgn0031323
2R	11152495	11172495	0	0.585856	FBgn0040764
3L	1340000	1360000	0	0.585529	FBgn0029514
2L	13360000	13380000	0	0.585421	FBgn0032509 FBgn0032511 FBgn0051855 FBgn0032514 FBgn0032512 FBgn0022069 FBgn0051852 FBgn0032513
3R	30414278	30434278	0	0.585378	FBgn0261704 FBgn0027544 FBgn0039764 FBgn0039768 FBgn0039767 FBgn0039766 FBgn0039765
2R	22372495	22392495	0	0.584669	FBgn0034722 FBgn0025878 FBgn0265978 FBgn0265980 FBgn0266866
3R	28534278	28554278	0	0.584213	FBgn0039588
3L	660000	680000	0	0.584115
3R	31314278	31334278	0	0.58398
3L	13986900	14006900	0	0.583977	FBgn0036397 FBgn0250848 FBgn0036395 FBgn0036396 FBgn0036394
2R	10732495	10752495	0	0.583738	FBgn0024956
2R	24152477	24172477	0	0.583729	FBgn0260775 FBgn0260770 FBgn0015544
3L	620000	640000	0	0.583409	FBgn0263342 FBgn0263042
3R	29234278	29254278	0	0.583253	FBgn0051427 FBgn0051445 FBgn0039656 FBgn0263236
2R	22332495	22352495	0	0.583151	FBgn0085237 FBgn0034721
3R	26474278	26494278	0	0.582936
2R	22872477	22892477	0	0.582912	FBgn0267823 FBgn0034793 FBgn0034791 FBgn0034789 FBgn0034792 FBgn0267025
2R	23272477	23292477	0	0.58275	FBgn0266010 FBgn0034841 FBgn0034840
3R	28194278	28214278	0	0.582645
2L	3680000	3700000	0	0.582311	FBgn0031559 FBgn0259954 FBgn0031563 FBgn0031560 FBgn0262721 FBgn0263096 FBgn0031558 FBgn0031561 FBgn0051779 FBgn0031562
3L	3540000	3560000	0	0.582206	FBgn0267470
3R	27894278	27914278	0	0.582028	FBgn0267366
2R	18892495	18912495	0	0.581928	FBgn0028669 FBgn0086022
3R	22614278	22634278	0	0.581672	FBgn0263452 FBgn0263451 FBgn0263863 FBgn0051161
2R	16132495	16152495	0	0.581667	FBgn0029175 FBgn0034081 FBgn0050094 FBgn0001124 FBgn0027091
3L	3480000	3500000	0	0.581474	FBgn0262484
3L	8626900	8646900	0	0.581443	FBgn0035921 FBgn0035918 FBgn0052029
2L	10180000	10200000	0	0.581382	FBgn0028675 FBgn0051874
3L	4160000	4180000	0	0.581357	FBgn0265722 FBgn0035504 FBgn0261274 FBgn0011653
2R	9052495	9072495	0	0.581205	FBgn0033369
2R	11772495	11792495	0	0.58106	FBgn0033651 FBgn0260007
2R	20392495	20412495	0	0.581044
2R	10532495	10552495	0	0.580775	FBgn0263466 FBgn0263481 FBgn0263483 FBgn0263482 FBgn0283426 FBgn0266628
3L	16066900	16086900	0	0.580688	FBgn0053258 FBgn0036563
2R	11652495	11672495	0	0.580385	FBgn0011916 FBgn0033640 FBgn0011915
2L	2980000	3000000	0	0.580342	FBgn0025109 FBgn0025681 FBgn0002989
3L	18846900	18866900	0	0.579971	FBgn0262461 FBgn0036817 FBgn0267572 FBgn0266937 FBgn0266936
2R	6792495	6812495	0	0.578664	FBgn0014028 FBgn0022224 FBgn0033104
2L	6680000	6700000	0	0.577997	FBgn0031849
3R	9094278	9114278	0	0.577795
2R	22292495	22312495	0	0.577752	FBgn0034718 FBgn0034717
3L	8306900	8326900	0	0.576463	FBgn0035871 FBgn0262361 FBgn0035873 FBgn0035872 FBgn0266958
2L	8540000	8560000	0	0.576281	FBgn0051603 FBgn0051604
2L	15540000	15560000	0	0.575414	FBgn0259922 FBgn0028880 FBgn0267292
2R	10192495	10212495	0	0.575383	FBgn0085250
2R	11872495	11892495	0	0.575031	FBgn0260932 FBgn0033663
2R	10552495	10572495	0	0.574867
2R	10872495	10892495	0	0.574429	FBgn0262412 FBgn0033566 FBgn0050016 FBgn0263510 FBgn0033564 FBgn0061356 FBgn0010356
3R	29814278	29834278	0	0.573277	FBgn0039702 FBgn0039704 FBgn0039703
3R	22594278	22614278	0	0.573224	FBgn0038993 FBgn0051156
3R	29994278	30014278	0	0.57262	FBgn0039735 FBgn0016685 FBgn0085327 FBgn0039736 FBgn0039731 FBgn0039733 FBgn0039734 FBgn0039732
3L	13046900	13066900	0	0.57257	FBgn0036343 FBgn0085457 FBgn0085458 FBgn0036342
2R	8512495	8532495	0	0.572171
2R	7112495	7132495	0	0.571668	FBgn0015039 FBgn0015038
2R	24432477	24452477	0	0.571648	FBgn0035005
3L	3980000	4000000	0	0.571614	FBgn0004880
2R	15892495	15912495	0	0.571412	FBgn0053463
3R	19014278	19034278	0	0.571098	FBgn0038672 FBgn0038673 FBgn0038674 FBgn0027785 FBgn0015781 FBgn0260779 FBgn0027784 FBgn0038675
2R	19632495	19652495	0	0.571045	FBgn0263515 FBgn0262966 FBgn0265696 FBgn0034462 FBgn0034461 FBgn0034460 FBgn0261807
3L	840000	860000	0	0.5706	FBgn0035167 FBgn0035168 FBgn0035169 FBgn0035170
3L	3520000	3540000	0	0.570079	FBgn0266403
3L	8166900	8186900	0	0.569979	FBgn0035847 FBgn0267529 FBgn0267530 FBgn0035848 FBgn0035849 FBgn0020392 FBgn0040290
2R	23072477	23092477	0	0.569819	FBgn0045482 FBgn0065073 FBgn0050202 FBgn0045483 FBgn0034820 FBgn0034819 FBgn0034816 FBgn0263707 FBgn0034817 FBgn0003062
2L	7300000	7320000	0	0.569726	FBgn0004009
3R	15374278	15394278	0	0.569586	FBgn0038334
2R	9992495	10012495	0	0.5694	FBgn0263557
3L	11746900	11766900	0	0.569078	FBgn0041231
3L	11306900	11326900	0	0.568995	FBgn0265933 FBgn0265934 FBgn0265932 FBgn0036153 FBgn0265468 FBgn0267960 FBgn0036154
2R	16992495	17012495	0	0.568641	FBgn0050461 FBgn0034175 FBgn0034179 FBgn0034177 FBgn0026402 FBgn0034176 FBgn0050462
2R	16812495	16832495	0	0.568634	FBgn0262432 FBgn0034160 FBgn0265530 FBgn0085489 FBgn0263336 FBgn0085488
3L	8406900	8426900	0	0.567708	FBgn0266667 FBgn0010431 FBgn0052354 FBgn0265102
3R	10074278	10094278	0	0.567485	FBgn0262378 FBgn0266414
3L	13646900	13666900	0	0.567463
2R	17272495	17292495	0	0.567383
3R	27734278	27754278	0	0.567055	FBgn0005659
3L	14906900	14926900	0	0.566669
2R	21272495	21292495	0	0.566281	FBgn0034611 FBgn0050392 FBgn0085232 FBgn0034612
3R	24854278	24874278	0	0.566258	FBgn0013949 FBgn0265266 FBgn0039235 FBgn0051119 FBgn0051105 FBgn0039238 FBgn0039239 FBgn0039237 FBgn0015625
2L	4700000	4720000	0	0.566227	FBgn0031623
2L	8060000	8080000	0	0.565384	FBgn0013531 FBgn0010287
2R	23652477	23672477	0	0.564943
2L	11500000	11520000	0	0.564291	FBgn0032364 FBgn0032363 FBgn0032362
2R	16272495	16292495	0	0.564032	FBgn0050324 FBgn0034105 FBgn0034106 FBgn0263976 FBgn0050100 FBgn0259718 FBgn0034103 FBgn0263981 FBgn0034104 FBgn0028424 FBgn0050099 FBgn0024249
3L	8926900	8946900	0	0.56402
3R	18194278	18214278	0	0.563637	FBgn0265041
2L	18360000	18380000	0	0.56343	FBgn0085200
3L	3380000	3400000	0	0.563416	FBgn0267301
2R	8232495	8252495	0	0.563274	FBgn0265632 FBgn0265639 FBgn0265638 FBgn0265303 FBgn0013726
3L	4520000	4540000	0	0.56321	FBgn0035557
2L	5000000	5020000	0	0.563146	FBgn0265968 FBgn0031670 FBgn0031668
2L	11660000	11680000	0	0.563129	FBgn0265673 FBgn0265670 FBgn0265674 FBgn0265672 FBgn0265690
2R	23752477	23772477	0	0.562878	FBgn0034902
2R	17872495	17892495	0	0.562834	FBgn0050110 FBgn0050325 FBgn0283437
3L	1240000	1260000	0	0.562786	FBgn0035196 FBgn0035195 FBgn0035197 FBgn0035198 FBgn0035194 FBgn0052318 FBgn0004378
3R	20894278	20914278	0	0.562261	FBgn0263460 FBgn0038839 FBgn0264915 FBgn0038840 FBgn0044810
3R	24754278	24774278	0	0.562161	FBgn0040600 FBgn0015591 FBgn0267210
3L	5146900	5166900	0	0.562028	FBgn0010747 FBgn0263831
3R	20194278	20214278	0	0.561665	FBgn0038775
2L	17480000	17500000	0	0.561458	FBgn0032644 FBgn0262857 FBgn0032645 FBgn0003187 FBgn0032642 FBgn0032643 FBgn0263654 FBgn0262856 FBgn0267279
3R	26934278	26954278	0	0.560992	FBgn0051070 FBgn0051071 FBgn0039463 FBgn0039462
3R	21554278	21574278	0	0.560335	FBgn0038892
3L	8546900	8566900	0	0.559931
3R	11474278	11494278	0	0.55968	FBgn0267141
3R	16174278	16194278	0	0.55963	FBgn0038405 FBgn0024491
3L	10986900	11006900	0	0.559582	FBgn0086077
2R	13492495	13512495	0	0.559518	FBgn0024556 FBgn0004638 FBgn0033845
3L	4260000	4280000	0	0.559368	FBgn0053764 FBgn0035520 FBgn0035521 FBgn0035522
2R	7052495	7072495	0	0.559223	FBgn0050298 FBgn0050299 FBgn0033140 FBgn0033135 FBgn0033136 FBgn0033139 FBgn0033138 FBgn0027558 FBgn0033137
2R	12112495	12132495	0	0.559164
2R	23712477	23732477	0	0.558994	FBgn0034898 FBgn0266864
3L	2560000	2580000	0	0.55879
3R	26614278	26634278	0	0.558197	FBgn0039441 FBgn0039439 FBgn0039438 FBgn0039437 FBgn0039436 FBgn0039435 FBgn0039440 FBgn0039434
3R	24774278	24794278	0	0.557702	FBgn0039224 FBgn0039223
3R	20994278	21014278	0	0.557568	FBgn0038845
2L	10980000	11000000	0	0.55729	FBgn0026148 FBgn0026147 FBgn0004872
2R	10452495	10472495	0	0.557171	FBgn0033527 FBgn0033526
2R	12132495	12152495	0	0.556869	FBgn0026176 FBgn0033685 FBgn0033683 FBgn0027495 FBgn0027504
2R	19132495	19152495	0	0.556527	FBgn0034419 FBgn0034418 FBgn0263290
2R	22652495	22672495	0	0.556164	FBgn0266806 FBgn0050273 FBgn0050269 FBgn0260768 FBgn0034761 FBgn0040658 FBgn0263031 FBgn0034756 FBgn0262141 FBgn0262142 FBgn0050196 FBgn0263030 FBgn0034758 FBgn0034759 FBgn0260767 FBgn0266807
3R	19894278	19914278	0	0.555925	FBgn0038746 FBgn0038745 FBgn0266407 FBgn0038747 FBgn0266408
3R	15634278	15654278	0	0.55589	FBgn0263041 FBgn0263040
2R	12952495	12972495	0	0.555741	FBgn0033787
2R	17392495	17412495	0	0.555244	FBgn0010620 FBgn0050101 FBgn0034210
3L	11126900	11146900	0	0.554778	FBgn0014368 FBgn0036138 FBgn0052074
3R	22734278	22754278	0	0.554763	FBgn0263143 FBgn0039019 FBgn0051139 FBgn0086253 FBgn0039020 FBgn0039017
3R	11974278	11994278	0	0.554575	FBgn0260745 FBgn0037974 FBgn0264984 FBgn0037972 FBgn0037975 FBgn0037973
3L	11666900	11686900	0	0.554075	FBgn0267544 FBgn0267540 FBgn0267542 FBgn0267543 FBgn0015828
3L	4660000	4680000	0	0.553814	FBgn0046793 FBgn0085295
3L	13126900	13146900	0	0.553531	FBgn0053262
3L	4040000	4060000	0	0.553348	FBgn0263832 FBgn0035490 FBgn0035491
3L	9566900	9586900	0	0.553117
2L	13400000	13420000	0	0.55294	FBgn0032523 FBgn0032522 FBgn0003983
2L	1280000	1300000	0	0.55281
3R	24934278	24954278	0	0.552671	FBgn0039255 FBgn0039254 FBgn0029157 FBgn0020626
3R	21634278	21654278	0	0.552657	FBgn0267723 FBgn0267724
3R	31254278	31274278	0	0.552041	FBgn0039838 FBgn0039839 FBgn0086362 FBgn0040628 FBgn0040629
2R	20932495	20952495	0	0.551984	FBgn0065059 FBgn0053704 FBgn0000044
3R	29654278	29674278	0	0.551766	FBgn0039679 FBgn0039676 FBgn0039675 FBgn0039677 FBgn0039678
2R	14612495	14632495	0	0.551747	FBgn0082951 FBgn0082940 FBgn0082939 FBgn0082926 FBgn0082950 FBgn0082952 FBgn0082941 FBgn0082931 FBgn0082930 FBgn0082929 FBgn0033948 FBgn0010638 FBgn0083123 FBgn0033949 FBgn0082919
3L	13626900	13646900	0	0.551572
2R	11292495	11312495	0	0.551478	FBgn0033615 FBgn0033616 FBgn0259238 FBgn0262574 FBgn0025373 FBgn0050033 FBgn0040763 FBgn0033614
3L	13666900	13686900	0	0.550655
3R	19834278	19854278	0	0.550363	FBgn0051459
3L	1800000	1820000	0	0.550211	FBgn0025820 FBgn0261562 FBgn0267247 FBgn0267246
3R	18834278	18854278	0	0.549964	FBgn0051226 FBgn0267193
3R	20974278	20994278	0	0.549601	FBgn0263400
3R	20774278	20794278	0	0.548841
3R	15394278	15414278	0	0.548823	FBgn0267725 FBgn0038337
2L	840000	860000	0	0.548544	FBgn0262177 FBgn0264869 FBgn0020545 FBgn0031288 FBgn0031287 FBgn0266884
3R	30334278	30354278	0	0.548436
3R	26654278	26674278	0	0.548319	FBgn0243586
2R	16112495	16132495	0	0.548282	FBgn0050095 FBgn0010052 FBgn0034076
3L	14026900	14046900	0	0.547933	FBgn0265295 FBgn0061515 FBgn0036402 FBgn0026418 FBgn0036403
2R	8272495	8292495	0	0.547849	FBgn0265307
3R	25914278	25934278	0	0.547632	FBgn0039395 FBgn0054024
2R	22072495	22092495	0	0.547619	FBgn0265046 FBgn0263250 FBgn0034692 FBgn0067102 FBgn0034689 FBgn0034691
2R	23092477	23112477	0	0.547396	FBgn0041236 FBgn0041235 FBgn0261614 FBgn0034822 FBgn0266008
2L	15480000	15500000	0	0.547245	FBgn0020371 FBgn0266831
2R	22252495	22272495	0	0.547143
2L	11220000	11240000	0	0.546772	FBgn0086035
3L	6226900	6246900	0	0.546248	FBgn0261631 FBgn0047334 FBgn0035694 FBgn0004513 FBgn0035695
2R	7032495	7052495	0	0.54624	FBgn0033132 FBgn0033131 FBgn0033133 FBgn0033130 FBgn0033129 FBgn0033134 FBgn0016032 FBgn0053914
2R	11372495	11392495	0	0.546088	FBgn0050022 FBgn0033628 FBgn0033631 FBgn0033629
3L	4780000	4800000	0	0.546027	FBgn0267471
2R	7172495	7192495	0	0.545867	FBgn0033149 FBgn0053140 FBgn0050385 FBgn0050384
3R	22454278	22474278	0	0.545712	FBgn0028688 FBgn0263351 FBgn0038972 FBgn0038973 FBgn0038974
3L	5866900	5886900	0	0.545324	FBgn0035641 FBgn0035642 FBgn0035643
3L	17466900	17486900	0	0.545166	FBgn0036728 FBgn0036730 FBgn0085279 FBgn0036729 FBgn0036731 FBgn0036727
2R	22812495	22832477	0	0.545026	FBgn0050272 FBgn0050271 FBgn0050274 FBgn0259179
3L	7846900	7866900	0	0.544889
2L	6820000	6840000	0	0.544763	FBgn0051632
3L	12946900	12966900	0	0.544337	FBgn0036325
2R	7092495	7112495	0	0.544216
2R	22472495	22492495	0	0.543555	FBgn0266433 FBgn0266432 FBgn0034733 FBgn0034734
3R	29534278	29554278	0	0.543409	FBgn0263588
3L	5726900	5746900	0	0.543084
2R	20612495	20632495	0	0.542895	FBgn0034527 FBgn0034529 FBgn0034528
3L	8986900	9006900	0	0.542818	FBgn0016070 FBgn0035953 FBgn0035952
3L	18086900	18106900	0	0.542513	FBgn0036773
2R	18092495	18112495	0	0.542393	FBgn0034300 FBgn0034301 FBgn0085225 FBgn0034299
3R	21794278	21814278	0	0.542259	FBgn0263521 FBgn0262331
3L	4500000	4520000	0	0.542132	FBgn0261526
2R	23672477	23692477	0	0.54205	FBgn0265052 FBgn0034887 FBgn0011296 FBgn0262728
3R	21454278	21474278	0	0.541935	FBgn0263407
2R	23052477	23072477	0	0.541892	FBgn0050201 FBgn0021979 FBgn0261363 FBgn0034814 FBgn0010622 FBgn0265187 FBgn0265188
2R	21512495	21532495	0	0.541717	FBgn0050289 FBgn0050288 FBgn0034634 FBgn0265938
3R	23734278	23754278	0	0.541683	FBgn0267760 FBgn0039110
3R	31154278	31174278	0	0.541519	FBgn0086704
2R	22272495	22292495	0	0.541205	FBgn0263341
2R	19552495	19572495	0	0.541067	FBgn0053535
3L	3080000	3100000	0	0.540651	FBgn0052272 FBgn0052286 FBgn0052285 FBgn0052287 FBgn0052288 FBgn0052289 FBgn0003938
3L	8586900	8606900	0	0.539494	FBgn0060292 FBgn0060291 FBgn0017579 FBgn0017429 FBgn0017430
3R	20214278	20234278	0	0.538818
2R	11432495	11452495	0	0.538558	FBgn0264271 FBgn0033635 FBgn0260499
2R	22052495	22072495	0	0.538516	FBgn0265192 FBgn0034683 FBgn0265184 FBgn0034687 FBgn0034684
2R	8692495	8712495	0	0.538211	FBgn0033322 FBgn0033323 FBgn0043576 FBgn0033321 FBgn0033324 FBgn0033320
3L	6746900	6766900	0	0.538061	FBgn0052392 FBgn0035714 FBgn0035715
2R	13672495	13692495	0	0.537242	FBgn0266392
2R	6892495	6912495	0	0.537128
2L	19440000	19460000	0	0.536995	FBgn0032785 FBgn0003732 FBgn0003346 FBgn0024230
3R	22514278	22534278	0	0.536819	FBgn0053093 FBgn0038981 FBgn0053099
3R	30214278	30234278	0	0.53679	FBgn0000279
3R	10914278	10934278	0	0.536524
3R	11094278	11114278	0	0.536394	FBgn0267139
3L	13146900	13166900	0	0.536336
2R	23632477	23652477	0	0.536127	FBgn0266646
3R	28554278	28574278	0	0.536056
3R	10054278	10074278	0	0.536043	FBgn0053629 FBgn0053630 FBgn0053631 FBgn0053783 FBgn0053784 FBgn0037783 FBgn0037782 FBgn0041105 FBgn0266732
3R	19394278	19414278	0	0.53596	FBgn0038704 FBgn0038705 FBgn0051244
2R	17092495	17112495	0	0.53586	FBgn0050456 FBgn0010226
2R	16292495	16312495	0	0.535744	FBgn0034110 FBgn0267793
2R	14912495	14932495	0	0.534891
3R	22754278	22774278	0	0.534779	FBgn0262538 FBgn0262537 FBgn0039023 FBgn0039022 FBgn0040588 FBgn0039024 FBgn0263513 FBgn0262541 FBgn0262539 FBgn0262540
3L	11106900	11126900	0	0.534747	FBgn0003462 FBgn0054012 FBgn0052073 FBgn0036134 FBgn0036136 FBgn0036131 FBgn0036133 FBgn0036135
3L	15206900	15226900	0	0.534176	FBgn0036490
3L	17006900	17026900	0	0.533277	FBgn0036687 FBgn0036685 FBgn0011293 FBgn0036686
3L	8686900	8706900	0	0.533122	FBgn0265719
3R	24134278	24154278	0	0.533051	FBgn0039155 FBgn0266673 FBgn0267339 FBgn0015765 FBgn0039154 FBgn0051133
2R	10772495	10792495	0	0.532954	FBgn0265347 FBgn0265346 FBgn0265345
2R	23812477	23832477	0	0.532246	FBgn0034910
2R	23612477	23632477	0	0.532174
3L	6346900	6366900	0	0.531883	FBgn0259969
2L	12040000	12060000	0	0.53186	FBgn0265800 FBgn0032401 FBgn0032400 FBgn0032399 FBgn0032402 FBgn0085193 FBgn0032404 FBgn0028425 FBgn0267739
3R	13934278	13954278	0	0.531459	FBgn0038190 FBgn0038188 FBgn0047199 FBgn0038189
2R	14772495	14792495	0	0.531449
2R	17832495	17852495	0	0.531438	FBgn0015522
2R	8412495	8432495	0	0.531163	FBgn0262988 FBgn0028836 FBgn0002531
3L	17426900	17446900	0	0.531021	FBgn0036723 FBgn0052174 FBgn0052176 FBgn0042641 FBgn0053052
2R	15352495	15372495	0	0.530944	FBgn0011660 FBgn0265652
3R	18674278	18694278	0	0.530894	FBgn0038639 FBgn0038640 FBgn0038643 FBgn0038642 FBgn0038641
3L	4000000	4020000	0	0.530669	FBgn0035482
3L	14306900	14326900	0	0.530529	FBgn0266383
3L	8726900	8746900	0	0.530013	FBgn0000355 FBgn0000358 FBgn0000356 FBgn0003149
3R	15934278	15954278	0	0.529905	FBgn0051088
3L	9666900	9686900	0	0.529734	FBgn0036029 FBgn0036028 FBgn0087040
2R	11452495	11472495	0	0.529394
3R	20594278	20614278	0	0.529243	FBgn0051506
3R	18414278	18434278	0	0.529193
3L	15746900	15766900	0	0.529023	FBgn0267916 FBgn0266775
3R	22914278	22934278	0	0.528881	FBgn0267757 FBgn0039030
2L	14760000	14780000	0	0.528872	FBgn0032549 FBgn0266152 FBgn0028870 FBgn0028838 FBgn0028868
2R	8252495	8272495	0	0.528692	FBgn0050375 FBgn0033280 FBgn0050371 FBgn0050376 FBgn0033277 FBgn0033279 FBgn0050369 FBgn0033278
3R	29974278	29994278	0	0.528539	FBgn0039728 FBgn0000032
3L	9846900	9866900	0	0.528313	FBgn0036053 FBgn0036052
3L	5906900	5926900	0	0.528198	FBgn0035648 FBgn0035649 FBgn0052407 FBgn0266677
3R	12394278	12414278	0	0.527996	FBgn0065087 FBgn0038037 FBgn0038035 FBgn0038034 FBgn0038038 FBgn0038039 FBgn0000455
3R	25414278	25434278	0	0.527952
3R	30134278	30154278	0	0.527243	FBgn0039748 FBgn0267751 FBgn0039747
2R	17852495	17872495	0	0.527237	FBgn0265590 FBgn0034282 FBgn0003701 FBgn0050323 FBgn0034281
3R	31234278	31254278	0	0.52706	FBgn0039835 FBgn0051005
3R	29274278	29294278	0	0.525946	FBgn0267128
3R	16734278	16754278	0	0.525893	FBgn0063261
2R	13352495	13372495	0	0.525602	FBgn0033828 FBgn0266851
3L	9106900	9126900	0	0.524775
3L	3240000	3260000	0	0.524434	FBgn0262368 FBgn0035426 FBgn0263246 FBgn0263617 FBgn0266973
2R	19532495	19552495	0	0.524394
3L	6966900	6986900	0	0.523925	FBgn0250849 FBgn0035727 FBgn0047205 FBgn0267662 FBgn0001104 FBgn0263387 FBgn0035726 FBgn0035725
3R	10494278	10514278	0	0.523798	FBgn0263547
2R	21832495	21852495	0	0.523175	FBgn0050407 FBgn0050406 FBgn0034665 FBgn0034663 FBgn0034664 FBgn0054040
3L	4980000	5000000	0	0.523134	FBgn0052232 FBgn0267245 FBgn0035584
3R	15234278	15254278	0	0.523132	FBgn0038309 FBgn0266599
2L	9440000	9460000	0	0.523049	FBgn0053723
2R	17612495	17632495	0	0.522928	FBgn0082922 FBgn0265576
2L	440000	460000	0	0.522737	FBgn0031256 FBgn0031257 FBgn0015924 FBgn0262510
3R	25274278	25294278	0	0.522664	FBgn0051104 FBgn0039313 FBgn0051300 FBgn0039311 FBgn0051098 FBgn0039312 FBgn0039315 FBgn0039316
2R	12452495	12472495	0	0.522651	FBgn0010238 FBgn0033741 FBgn0033740
2R	8712495	8732495	0	0.522375	FBgn0263463 FBgn0050357 FBgn0043575 FBgn0033327 FBgn0005695 FBgn0050356 FBgn0040777
3R	22694278	22714278	0	0.521916	FBgn0263986 FBgn0039007 FBgn0039008 FBgn0039010 FBgn0039006 FBgn0039009
2R	12912495	12932495	0	0.521887	FBgn0033781 FBgn0033782 FBgn0010488
3R	23234278	23254278	0	0.521272	FBgn0039065
2R	16252495	16272495	0	0.521092	FBgn0001308 FBgn0015925 FBgn0025519
3L	3940000	3960000	0	0.520986	FBgn0264517 FBgn0035477 FBgn0035478 FBgn0035480 FBgn0035479 FBgn0027552
2R	11972495	11992495	0	0.520616	FBgn0085260 FBgn0033673 FBgn0033672 FBgn0011704 FBgn0053145 FBgn0050037 FBgn0050036
3R	27834278	27854278	0	0.520195	FBgn0039551 FBgn0067407
2R	22752495	22772495	0	0.520192	FBgn0034774 FBgn0050267 FBgn0034776
2L	11160000	11180000	0	0.520112	FBgn0014076
2R	22832477	22852477	0	0.520017	FBgn0034782 FBgn0034784 FBgn0034783 FBgn0034785
3R	23774278	23794278	0	0.519976
3R	31614278	31634278	0	0.519854	FBgn0039860 FBgn0039861 FBgn0039859
2R	8292495	8312495	0	0.518621	FBgn0262440 FBgn0265640 FBgn0265641 FBgn0265643 FBgn0265642
2R	22712495	22732495	0	0.518187	FBgn0050268
3R	15174278	15194278	0	0.518082	FBgn0263633
2R	23172477	23192477	0	0.517906	FBgn0034833
3L	15006900	15026900	0	0.517579	FBgn0047338
3R	12994278	13014278	0	0.516888	FBgn0038109 FBgn0038106 FBgn0265083 FBgn0038107 FBgn0038108 FBgn0038110
2L	480000	500000	0	0.516825	FBgn0267991
3R	30894278	30914278	0	0.516202	FBgn0267940 FBgn0053483
3R	29294278	29314278	0	0.516158
2L	6220000	6240000	0	0.516038	FBgn0026755 FBgn0266070
3R	18994278	19014278	0	0.51583
3L	1620000	1640000	0	0.515444	FBgn0035246 FBgn0013342 FBgn0035247 FBgn0035245
3L	16666900	16686900	0	0.514834	FBgn0036652 FBgn0040512 FBgn0266776
3L	15186900	15206900	0	0.514701	FBgn0265755
2L	7640000	7660000	0	0.514638
3R	24594278	24614278	0	0.514545	FBgn0267764
2R	21972495	21992495	0	0.51426	FBgn0041239 FBgn0041237 FBgn0041238 FBgn0034674 FBgn0050401
3R	24494278	24514278	0	0.513707
2R	20732495	20752495	0	0.513679	FBgn0085230
2L	16300000	16320000	0	0.513623	FBgn0028894 FBgn0028525 FBgn0011708 FBgn0001086 FBgn0000339 FBgn0015338
2L	900000	920000	0	0.513573	FBgn0046113 FBgn0003916 FBgn0266799 FBgn0264870
2L	6920000	6940000	0	0.513555	FBgn0004838 FBgn0262877
2L	7460000	7480000	0	0.513356	FBgn0031920 FBgn0031918
2R	22592495	22612495	0	0.513265	FBgn0083005 FBgn0083004 FBgn0083003 FBgn0082925 FBgn0086028 FBgn0034741 FBgn0034742 FBgn0034744 FBgn0034743 FBgn0034739 FBgn0266867
3L	7386900	7406900	0	0.512671	FBgn0063083 FBgn0052379 FBgn0035777 FBgn0035779 FBgn0035780 FBgn0035781
3R	27214278	27234278	0	0.51218	FBgn0261995 FBgn0054006 FBgn0261996
3L	5080000	5100000	0	0.510089	FBgn0267917 FBgn0054047
2L	19060000	19080000	0	0.509537	FBgn0053315 FBgn0032754 FBgn0032752 FBgn0032753 FBgn0032750 FBgn0032751
3R	15354278	15374278	0	0.50934	FBgn0038331 FBgn0038327 FBgn0038332 FBgn0038330 FBgn0085433 FBgn0026737 FBgn0026634 FBgn0038326
3R	13014278	13034278	0	0.509034	FBgn0002354 FBgn0038111
2R	13532495	13552495	0	0.508989	FBgn0011896 FBgn0033853
3L	15706900	15726900	0	0.508775	FBgn0260776 FBgn0260777
2L	12760000	12780000	0	0.508514	FBgn0267925 FBgn0032457
3R	21234278	21254278	0	0.507294	FBgn0038873
3R	25374278	25394278	0	0.507112	FBgn0051437 FBgn0039332
3L	4220000	4240000	0	0.507025	FBgn0001257 FBgn0052252
3L	12386900	12406900	0	0.50668	FBgn0011279 FBgn0036282 FBgn0052104
2R	10832495	10852495	0	0.506246	FBgn0027525
2L	5100000	5120000	0	0.505683
2L	6660000	6680000	0	0.505617	FBgn0263200 FBgn0031848 FBgn0031844 FBgn0000392 FBgn0000351 FBgn0028990 FBgn0085339
3R	21694278	21714278	0	0.505542
2L	6260000	6280000	0	0.50545	FBgn0261699 FBgn0031792
3L	16986900	17006900	0	0.505311	FBgn0262189
3L	12046900	12066900	0	0.504933
3L	10546900	10566900	0	0.504419	FBgn0036085
3R	21534278	21554278	0	0.504382	FBgn0264825
3L	11686900	11706900	0	0.503997	FBgn0267545 FBgn0036192 FBgn0036195 FBgn0036193 FBgn0264479 FBgn0036194
2R	13152495	13172495	0	0.50375	FBgn0085468 FBgn0033798 FBgn0033799 FBgn0020391 FBgn0086532 FBgn0020370 FBgn0266635
2R	12932495	12952495	0	0.50295	FBgn0265185 FBgn0265186 FBgn0050487 FBgn0033785 FBgn0004512 FBgn0033784
3L	15246900	15266900	0	0.502886
2R	6972495	6992495	0	0.502833	FBgn0050157 FBgn0022960 FBgn0033122 FBgn0265059 FBgn0265060 FBgn0050156
3R	22974278	22994278	0	0.502167	FBgn0039034 FBgn0039033 FBgn0039031
2R	19612495	19632495	0	0.502033
3L	11626900	11646900	0	0.501937	FBgn0263632 FBgn0036186 FBgn0042138 FBgn0052091 FBgn0266651
2R	15912495	15932495	0	0.50187	FBgn0034049 FBgn0265511
3L	13066900	13086900	0	0.501578	FBgn0263661
3R	15074278	15094278	0	0.501493	FBgn0038285
3R	18354278	18374278	0	0.501391	FBgn0038607 FBgn0038609 FBgn0004618 FBgn0038608 FBgn0040569 FBgn0267194
3R	19254278	19274278	0	0.500576	FBgn0038695
3L	7186900	7206900	0	0.500155
3R	10554278	10574278	0	0.499891
2R	21332495	21352495	0	0.499818	FBgn0083046 FBgn0083045 FBgn0065102 FBgn0034622 FBgn0034624 FBgn0034623 FBgn0086026
2L	1640000	1660000	0	0.499758	FBgn0267259
2R	10652495	10672495	0	0.49973	FBgn0265645
3R	23714278	23734278	0	0.499632	FBgn0039108 FBgn0065098 FBgn0039109 FBgn0028691
2L	6840000	6860000	0	0.499271	FBgn0017551
3L	3020000	3040000	0	0.498994	FBgn0004372
3R	23994278	24014278	0	0.498862	FBgn0053108 FBgn0051184
3L	2400000	2420000	0	0.49856
3L	2680000	2700000	0	0.498558
3R	29054278	29074278	0	0.498466	FBgn0039632 FBgn0267776 FBgn0039631 FBgn0039630
3R	25954278	25974278	0	0.498367	FBgn0000206 FBgn0039398
2R	15412495	15432495	0	0.498247	FBgn0085217 FBgn0050472
2R	11552495	11572495	0	0.498233
2L	6880000	6900000	0	0.49822
2R	15292495	15312495	0	0.497894	FBgn0034008 FBgn0034007 FBgn0265176
2R	14792495	14812495	0	0.497601	FBgn0033968
3R	20294278	20314278	0	0.497033	FBgn0038783 FBgn0038784
3R	29754278	29774278	0	0.496908	FBgn0266258
3L	10526900	10546900	0	0.496208
3R	26334278	26354278	0	0.496155	FBgn0039421
3R	25054278	25074278	0	0.495658	FBgn0039271 FBgn0266719 FBgn0039272 FBgn0039270 FBgn0011336 FBgn0039269 FBgn0051111
3L	1680000	1700000	0	0.49562	FBgn0035257
3R	28434278	28454278	0	0.495554
3L	11006900	11026900	0	0.495387	FBgn0029172
3L	6786900	6806900	0	0.494824	FBgn0086680
2R	16232495	16252495	0	0.494773	FBgn0034099 FBgn0034096 FBgn0034097 FBgn0034098
2R	15212495	15232495	0	0.494747	FBgn0034002 FBgn0001187 FBgn0034001 FBgn0033999 FBgn0265656 FBgn0034000
2R	12832495	12852495	0	0.494737	FBgn0033775 FBgn0265646 FBgn0250842 FBgn0050488 FBgn0028963 FBgn0050486 FBgn0267024
3R	18274278	18294278	0	0.49468	FBgn0026250 FBgn0038596 FBgn0038595 FBgn0038597 FBgn0038598
3L	8666900	8686900	0	0.494254	FBgn0001168
2R	23732477	23752477	0	0.494084	FBgn0263543 FBgn0083941 FBgn0000562 FBgn0034900 FBgn0034899
2L	10260000	10280000	0	0.493907	FBgn0260750 FBgn0032204 FBgn0032202 FBgn0259482 FBgn0032205 FBgn0260749 FBgn0003751 FBgn0011305
2R	15992495	16012495	0	0.493532	FBgn0034060 FBgn0034062 FBgn0034061 FBgn0020236
3L	9166900	9186900	0	0.493345
3L	17266900	17286900	0	0.493056	FBgn0266985
3R	16054278	16074278	0	0.492918	FBgn0038397
3L	4840000	4860000	0	0.492857	FBgn0052237
2R	10632495	10652495	0	0.492764	FBgn0033540 FBgn0033541 FBgn0033539
2R	8532495	8552495	0	0.492757	FBgn0265306 FBgn0033301
3R	29174278	29194278	0	0.492711
2R	24632477	24652477	0	0.492601	FBgn0035043 FBgn0035042
2L	6020000	6040000	0	0.492259	FBgn0031763 FBgn0031765 FBgn0031766 FBgn0031764 FBgn0025742
3R	19734278	19754278	0	0.492081	FBgn0263499
2R	10792495	10812495	0	0.491759	FBgn0027499 FBgn0033547 FBgn0033549 FBgn0033548
3L	5606900	5626900	0	0.491692	FBgn0035624
3L	11366900	11386900	0	0.491081	FBgn0261813
2L	8120000	8140000	0	0.490828	FBgn0031986 FBgn0031988 FBgn0031987
3L	9726900	9746900	0	0.490308	FBgn0263541 FBgn0036040 FBgn0019644 FBgn0265448
2R	9412495	9432495	0	0.490281	FBgn0033412 FBgn0033413 FBgn0041087
2L	620000	640000	0	0.489613	FBgn0266032 FBgn0266033 FBgn0040106 FBgn0040107 FBgn0266909 FBgn0031273
2R	11032495	11052495	0	0.48885
3L	9746900	9766900	0	0.488845	FBgn0266956
2R	23412477	23432477	0	0.487874	FBgn0050411
3R	29614278	29634278	0	0.487601	FBgn0039674
3R	21874278	21894278	0	0.484335	FBgn0264426 FBgn0053092 FBgn0083984 FBgn0038912 FBgn0266406 FBgn0038915 FBgn0038914 FBgn0051465 FBgn0038916
2R	10012495	10032495	0	0.483719	FBgn0033473 FBgn0265340
3R	26414278	26434278	0	0.483554	FBgn0040606 FBgn0051084 FBgn0085320 FBgn0263382
2R	15832495	15852495	0	0.483449	FBgn0034045
3R	31414278	31434278	0	0.483208
3L	16386900	16406900	0	0.482901	FBgn0266099 FBgn0036627
3R	16534278	16554278	0	0.482711
3R	24834278	24854278	0	0.482223	FBgn0053658 FBgn0013953 FBgn0039233 FBgn0266743
2R	14152495	14172495	0	0.481451	FBgn0086895 FBgn0033901 FBgn0033902 FBgn0033900 FBgn0040751 FBgn0033904 FBgn0033905 FBgn0033903 FBgn0033899 FBgn0265499
3L	9826900	9846900	0	0.480719	FBgn0015618 FBgn0028429
3R	22214278	22234278	0	0.479684
3R	13814278	13834278	0	0.479243	FBgn0263650 FBgn0263651 FBgn0262992 FBgn0002862
3L	19046900	19066900	0	0.479198	FBgn0265886 FBgn0263326 FBgn0015586 FBgn0036843 FBgn0036842
3L	8366900	8386900	0	0.478831
3L	11226900	11246900	0	0.476741	FBgn0265930 FBgn0265929 FBgn0267717 FBgn0036150 FBgn0266954
3L	14346900	14366900	0	0.47541
3L	18866900	18886900	0	0.474951	FBgn0036819 FBgn0085284 FBgn0036820 FBgn0014075 FBgn0025807
3R	10774278	10794278	0	0.471528	FBgn0260944 FBgn0017577 FBgn0037835 FBgn0037834 FBgn0261380 FBgn0037832 FBgn0261356
3R	28494278	28514278	0	0.470814
3L	17446900	17466900	0	0.470034	FBgn0265758 FBgn0036726
2R	21752495	21772495	0	0.467254	FBgn0034658 FBgn0050395 FBgn0264714 FBgn0264716 FBgn0264715
2R	14552495	14572495	0	0.465004	FBgn0264540
2R	17692495	17712495	0	0.463376	FBgn0063387 FBgn0063388 FBgn0063382 FBgn0063374 FBgn0063384 FBgn0063376 FBgn0063383 FBgn0063380 FBgn0063379 FBgn0063378 FBgn0063373 FBgn0027872 FBgn0045800 FBgn0063386 FBgn0063381 FBgn0063377 FBgn0063385 FBgn0063375 FBgn0266639
2L	1840000	1860000	0	0.463105	FBgn0264883
3R	24214278	24234278	0	0.462987	FBgn0002863 FBgn0026257 FBgn0039172 FBgn0039170 FBgn0039169 FBgn0039167 FBgn0264901 FBgn0266744
3L	7586900	7606900	0	0.462656	FBgn0035800
3R	16354278	16374278	0	0.462429	FBgn0038421 FBgn0259917 FBgn0038423 FBgn0038422 FBgn0266703
3R	11234278	11254278	0	0.457696	FBgn0051388 FBgn0037885 FBgn0037891 FBgn0037890 FBgn0051441 FBgn0037888 FBgn0037889
2R	10152495	10172495	0	0.456001	FBgn0265512 FBgn0266626
2R	15072495	15092495	0	0.454528	FBgn0265650
3L	19066900	19086900	0	0.453973
2R	15092495	15112495	0	0.452913
2L	14840000	14860000	0	0.449273	FBgn0028886 FBgn0261568 FBgn0264349
3L	2100000	2120000	0	0.448283	FBgn0267452
3R	18554278	18574278	0	0.447215	FBgn0038626 FBgn0262846 FBgn0262823
3L	17386900	17406900	0	0.446057	FBgn0026197
3R	24194278	24214278	0	0.445613
3R	11614278	11634278	0	0.440295	FBgn0037920 FBgn0037921 FBgn0037922 FBgn0042205 FBgn0037924 FBgn0037923
2L	8760000	8780000	0	0.439017	FBgn0032066 FBgn0032067 FBgn0032068
3R	24074278	24094278	0	0.427616
2R	15632495	15652495	0	0.425844
2L	18980000	19000000	0	0.425454	FBgn0032732 FBgn0032734 FBgn0032733 FBgn0046302
3R	11874278	11894278	0	0.425091	FBgn0003312 FBgn0037962 FBgn0037958 FBgn0051368 FBgn0037960
3R	15214278	15234278	0	0.424407	FBgn0038303 FBgn0263448 FBgn0085345 FBgn0038307 FBgn0038306 FBgn0038304 FBgn0263979 FBgn0051344 FBgn0051155
2R	9972495	9992495	0	0.424049	FBgn0000606 FBgn0264599 FBgn0266863
2L	15760000	15780000	0	0.424	FBgn0264260 FBgn0028507 FBgn0041627 FBgn0051826 FBgn0001990
2R	24032477	24052477	0	0.4221	FBgn0028552 FBgn0034964 FBgn0011726 FBgn0034963 FBgn0034962
3R	21514278	21534278	0	0.421277	FBgn0263130 FBgn0038890
3R	9354278	9374278	0	0.419023	FBgn0086054 FBgn0263750 FBgn0037683 FBgn0037684
3L	17326900	17346900	0	0.414252	FBgn0052173 FBgn0036711 FBgn0036709 FBgn0265756 FBgn0265757 FBgn0036712 FBgn0036710
2R	15112495	15132495	0	0.408213
3R	27314278	27334278	0	0.406242	FBgn0265314 FBgn0039511
3L	14706900	14726900	0	0.40134
3R	7574278	7594278	0	0.390203

## Sheet: Hard Sweep
2L	2100000	2120000	1	1
2R	11012495	11032495	1	1
3L	7666900	7686900	1	1
2L	13640000	13660000	1	0.999999	FBgn0265939
2R	18352495	18372495	1	0.999999
2R	14092495	14112495	1	0.999999
2L	7720000	7740000	1	0.999999	FBgn0260479 FBgn0267743 FBgn0031939 FBgn0031937
2L	14640000	14660000	1	0.999999
2L	12920000	12940000	1	0.999999	FBgn0265072 FBgn0040506 FBgn0040510
2L	6420000	6440000	1	0.999998	FBgn0263278
2L	16140000	16160000	1	0.999998
3R	26374278	26394278	1	0.999998
3R	28754278	28774278	1	0.999996	FBgn0039597 FBgn0039598
2L	2760000	2780000	1	0.999996	FBgn0028398 FBgn0031459 FBgn0019830 FBgn0031458 FBgn0026324 FBgn0031457 FBgn0031460
3R	13134278	13154278	1	0.999995
3R	21294278	21314278	1	0.999995
3L	11486900	11506900	1	0.999994	FBgn0036165
2L	2280000	2300000	1	0.999993	FBgn0031410 FBgn0051681 FBgn0028570 FBgn0031409 FBgn0261523 FBgn0264085
3L	2440000	2460000	1	0.999989
2L	12780000	12800000	1	0.999987
2L	21460000	21480000	1	0.999984	FBgn0053731 FBgn0053732 FBgn0053733 FBgn0053734 FBgn0053824 FBgn0053891 FBgn0053892 FBgn0053893 FBgn0053894 FBgn0053895 FBgn0053825 FBgn0053826 FBgn0053827 FBgn0053828 FBgn0053829 FBgn0053819 FBgn0053820 FBgn0053821 FBgn0053822 FBgn0053823 FBgn0053896 FBgn0053897 FBgn0053898
3R	20154278	20174278	1	0.999982
3L	3060000	3080000	1	0.999981
2L	1680000	1700000	1	0.99998
2L	21480000	21500000	1	0.999975	FBgn0053736 FBgn0053735 FBgn0053737 FBgn0053738 FBgn0053841 FBgn0053883 FBgn0053884 FBgn0053885 FBgn0053886 FBgn0053887 FBgn0053888 FBgn0053889 FBgn0053890 FBgn0053831 FBgn0053832 FBgn0053833 FBgn0053834 FBgn0053835 FBgn0053836 FBgn0053837 FBgn0053838 FBgn0053839 FBgn0053840
2R	5572495	5592495	1	0.999972
3R	25834278	25854278	1	0.999965	FBgn0039379 FBgn0040602 FBgn0267213 FBgn0267214 FBgn0267215 FBgn0267217 FBgn0267216
2L	15680000	15700000	1	0.999963	FBgn0051780 FBgn0264989
2L	13000000	13020000	1	0.99996	FBgn0021796 FBgn0032467 FBgn0265262
3R	25714278	25734278	1	0.999951
2L	15660000	15680000	1	0.999931	FBgn0028864 FBgn0264544 FBgn0028517
3L	5100000	5126900	1	0.99993
2L	11540000	11560000	1	0.999927	FBgn0265687
2L	4660000	4680000	1	0.99992
2L	15440000	15460000	1	0.999917	FBgn0266156
2R	6372495	6392495	1	0.999916
3L	8486900	8506900	1	0.999913
3R	15894278	15914278	1	0.999913	FBgn0038381 FBgn0027657 FBgn0051292
3R	20254278	20274278	1	0.999912
3R	28234278	28254278	1	0.999906	FBgn0266401
2L	1880000	1900000	1	0.999905	FBgn0031373
2L	10940000	10960000	1	0.999902	FBgn0265686 FBgn0265685
3L	24426900	24446900	1	0.999886
2L	13100000	13120000	1	0.999886	FBgn0265087 FBgn0032470 FBgn0267017
2L	14800000	14820000	1	0.999884	FBgn0250834 FBgn0053309
2L	12200000	12220000	1	0.999882	FBgn0051759
3L	24406900	24426900	1	0.999881
2L	21440000	21460000	1	0.999876	FBgn0053729 FBgn0053730 FBgn0053812 FBgn0053813 FBgn0053814 FBgn0053815 FBgn0053816 FBgn0053817 FBgn0053818 FBgn0053899 FBgn0053900 FBgn0053901 FBgn0053902
2L	15120000	15140000	1	0.999872	FBgn0028889 FBgn0265917 FBgn0264436
3R	17494278	17514278	1	0.999871
3R	27854278	27874278	1	0.999867	FBgn0039552
2L	2560000	2580000	1	0.999865	FBgn0031435 FBgn0041337 FBgn0026778 FBgn0085343 FBgn0031432 FBgn0031434
3R	16754278	16774278	1	0.999864
2L	13080000	13100000	1	0.999863	FBgn0267003 FBgn0265086
3L	24486900	24506900	1	0.999856
2R	21732495	21752495	1	0.99985
2L	16040000	16060000	1	0.999817	FBgn0266459 FBgn0000182
3R	28174278	28194278	1	0.999811
2L	11700000	11720000	1	0.999809
2L	980000	1000000	1	0.999807	FBgn0266036
2L	14720000	14740000	1	0.999807	FBgn0051835 FBgn0028537 FBgn0266151 FBgn0261571
2L	1800000	1820000	1	0.99978
3R	27514278	27534278	1	0.999778	FBgn0039522 FBgn0039523
2L	17060000	17080000	1	0.999777
2L	15700000	15720000	1	0.999774	FBgn0264545 FBgn0051827
2L	16660000	16680000	1	0.999773	FBgn0262191 FBgn0001185 FBgn0032593
2L	2300000	2320000	1	0.999772	FBgn0031412 FBgn0051949
2L	13840000	13860000	1	0.999756	FBgn0028532 FBgn0028920 FBgn0028534 FBgn0053306 FBgn0028533
2L	10580000	10600000	1	0.999751	FBgn0085190
2L	2340000	2360000	1	0.999746
2L	21500000	21520000	1	0.999742	FBgn0053742 FBgn0053741 FBgn0053739 FBgn0053740 FBgn0053847 FBgn0053848 FBgn0053849 FBgn0053850 FBgn0053851 FBgn0053852 FBgn0053877 FBgn0053878 FBgn0053879 FBgn0053880 FBgn0053881 FBgn0053882 FBgn0053853 FBgn0053876 FBgn0053843 FBgn0053844 FBgn0053845 FBgn0053846
2L	12720000	12740000	1	0.999739
3R	26214278	26234278	1	0.99972
2L	13020000	13040000	1	0.999707
3L	19726900	19746900	1	0.999675	FBgn0260434
3R	27134278	27154278	1	0.999673
2L	16500000	16520000	1	0.999663
3L	4440000	4460000	1	0.999662	FBgn0035545 FBgn0035546 FBgn0267303
3L	7906900	7926900	1	0.999661	FBgn0052368 FBgn0035824 FBgn0035825
2L	3760000	3780000	1	0.999658	FBgn0262392 FBgn0263842 FBgn0263843
2L	23067268	23087268	1	0.999645	FBgn0262887
3L	6406900	6426900	1	0.999628
2R	19732495	19752495	1	0.999627	FBgn0053398 FBgn0053399 FBgn0053401 FBgn0053429 FBgn0053405 FBgn0053402 FBgn0053400 FBgn0053414 FBgn0053409 FBgn0053410 FBgn0053411 FBgn0053412 FBgn0053419 FBgn0053418 FBgn0053421 FBgn0053422 FBgn0053423 FBgn0053424 FBgn0053425 FBgn0053426 FBgn0053394 FBgn0053395 FBgn0053396 FBgn0053397 FBgn0053391 FBgn0053392 FBgn0053393 FBgn0053432 FBgn0053408 FBgn0053403 FBgn0053404 FBgn0053406 FBgn0053407 FBg…
3R	23834278	23854278	1	0.999622
2L	10640000	10660000	1	0.999622	FBgn0032276 FBgn0265791 FBgn0265264 FBgn0043825 FBgn0267256 FBgn0267254
2L	11980000	12000000	1	0.99962	FBgn0032387 FBgn0032390 FBgn0051864 FBgn0261266 FBgn0032388 FBgn0032391 FBgn0085192 FBgn0051866 FBgn0042125 FBgn0042127 FBgn0051865
3R	13234278	13254278	1	0.999617
3R	27874278	27894278	1	0.999613
3R	27334278	27354278	1	0.999594
2L	15580000	15600000	1	0.999587
3R	28054278	28074278	1	0.999582
2R	9472495	9492495	1	0.999542
2L	22607268	22627268	1	0.999541
2L	23047268	23067268	1	0.999516
2L	5160000	5180000	1	0.999514
3L	5446900	5466900	1	0.999514
3L	7786900	7806900	1	0.999492
2L	8720000	8740000	1	0.999489
3R	15594278	15614278	1	0.99948
2L	17040000	17060000	1	0.999428	FBgn0264346 FBgn0032625
3R	15614278	15634278	1	0.999404
2L	12940000	12960000	1	0.999384
2L	16120000	16140000	1	0.999382	FBgn0028884 FBgn0085197 FBgn0266165
2L	8580000	8600000	1	0.999359	FBgn0264437
2L	22867268	22887268	1	0.999331
2L	16060000	16080000	1	0.999319	FBgn0266164
2L	15820000	15840000	1	0.999312	FBgn0028900 FBgn0051822 FBgn0266908 FBgn0265812
2L	2220000	2240000	1	0.99931	FBgn0052463 FBgn0267378 FBgn0031401 FBgn0264946 FBgn0262126 FBgn0264945 FBgn0031403 FBgn0051679
2R	6392495	6412495	1	0.99931
3R	31074278	31094278	1	0.999293
3R	19434278	19454278	1	0.999284
3L	19746900	19766900	1	0.999256	FBgn0036905
3R	19694278	19714278	1	0.999252
2R	6352495	6372495	1	0.999244
3L	10046900	10066900	1	0.999233	FBgn0267538
2L	11560000	11580000	1	0.999199	FBgn0265688
2L	22887268	22907268	1	0.999129
2L	5820000	5840000	1	0.999048
3L	9926900	9946900	1	0.999042
2L	17080000	17100000	1	0.999021	FBgn0032626 FBgn0264367
2L	13660000	13680000	1	0.998989	FBgn0028527
2L	9960000	9980000	1	0.99896	FBgn0015664 FBgn0011272 FBgn0263766
3R	13214278	13234278	1	0.998959	FBgn0038127
2L	14740000	14760000	1	0.99895	FBgn0260955 FBgn0260954 FBgn0085195 FBgn0261567 FBgn0267015 FBgn0267014 FBgn0267016
2L	13060000	13080000	1	0.998906
2L	14000000	14020000	1	0.998868	FBgn0028909 FBgn0027348 FBgn0261582
2R	12852495	12872495	1	0.998859	FBgn0000181 FBgn0266633
2L	2360000	2380000	1	0.998797	FBgn0031417 FBgn0266317 FBgn0031418 FBgn0031419 FBgn0261647
2L	9480000	9500000	1	0.998773	FBgn0004868
2R	18592495	18612495	1	0.998764
3R	17574278	17594278	1	0.998756
2L	13300000	13320000	1	0.998724	FBgn0264301 FBgn0032503
3R	21134278	21154278	1	0.998707	FBgn0250820
2L	17020000	17040000	1	0.998695
2R	10172495	10192495	1	0.998692
2L	2200000	2220000	1	0.998664	FBgn0031397 FBgn0085203 FBgn0031398 FBgn0053124 FBgn0051668 FBgn0040715 FBgn0259717 FBgn0010288
2L	14660000	14680000	1	0.998639
3R	12474278	12494278	1	0.998613	FBgn0052865
2L	9220000	9240000	1	0.998597	FBgn0051885
2L	10140000	10160000	1	0.998585	FBgn0032187
2R	15012495	15032495	1	0.99855	FBgn0043530 FBgn0262547 FBgn0266791
3L	24126900	24146900	1	0.998526
2L	3740000	3760000	1	0.998517
2L	11720000	11740000	1	0.998496	FBgn0264992 FBgn0264994
2L	12480000	12500000	1	0.998481	FBgn0051858
2L	1820000	1840000	1	0.998476	FBgn0262275 FBgn0051933 FBgn0051664 FBgn0264882 FBgn0031367
2L	1700000	1720000	1	0.99847	FBgn0266311 FBgn0011570 FBgn0031357 FBgn0086698 FBgn0031356
3R	30374278	30394278	1	0.998411	FBgn0015221 FBgn0015222
2L	9880000	9900000	1	0.998391	FBgn0063391 FBgn0032153 FBgn0063449 FBgn0063392 FBgn0085212 FBgn0025881 FBgn0063389 FBgn0265912 FBgn0029174 FBgn0032154 FBgn0010520 FBgn0004867
3R	11054278	11074278	1	0.998385
2L	12440000	12460000	1	0.998355	FBgn0032437 FBgn0032435 FBgn0032434 FBgn0032433 FBgn0032436
2L	15140000	15160000	1	0.99833
2L	12800000	12820000	1	0.998278	FBgn0264366
2L	9900000	9920000	1	0.998231	FBgn0025700 FBgn0024285 FBgn0032157 FBgn0040064 FBgn0032156
2L	10860000	10880000	1	0.998217	FBgn0032311 FBgn0264351 FBgn0267009 FBgn0267010
3L	16946900	16966900	1	0.998198
3R	26094278	26114278	1	0.998192
2L	12860000	12880000	1	0.998145
3R	11834278	11854278	1	0.998136
3R	15094278	15114278	1	0.998075
2L	19640000	19660000	1	0.998024	FBgn0266314
3L	23826900	23846900	1	0.998007
2L	14040000	14060000	1	0.998	FBgn0260011
2L	12220000	12240000	1	0.997957
2L	20180000	20200000	1	0.997947
2L	15240000	15260000	1	0.997899	FBgn0027559 FBgn0259982 FBgn0028862
2L	14880000	14900000	1	0.997886	FBgn0013301 FBgn0266840
2L	1000000	1020000	1	0.997883
3L	18706900	18726900	1	0.997837	FBgn0264717 FBgn0036809 FBgn0265885
2L	1220000	1240000	1	0.99782
2L	14320000	14340000	1	0.99776	FBgn0261529
2L	3640000	3660000	1	0.997692
2L	14020000	14040000	1	0.99766	FBgn0028872 FBgn0028519 FBgn0266822 FBgn0051840 FBgn0266892
2L	15360000	15380000	1	0.997622	FBgn0032563
2R	17232495	17252495	1	0.997612	FBgn0046294 FBgn0034206 FBgn0267955
2R	11112495	11132495	1	0.997603	FBgn0053503 FBgn0050489
3R	13374278	13394278	1	0.997589	FBgn0264987 FBgn0038145 FBgn0038144 FBgn0038146 FBgn0044511
2L	16020000	16040000	1	0.997571
3R	18734278	18754278	1	0.997543	FBgn0260399 FBgn0038649
2L	21520000	21540000	1	0.997507	FBgn0053743 FBgn0053744 FBgn0053745 FBgn0053746 FBgn0053873 FBgn0053869 FBgn0053860 FBgn0053871 FBgn0053854 FBgn0053855 FBgn0053856 FBgn0053857 FBgn0053858 FBgn0053859 FBgn0053861 FBgn0053862 FBgn0053863 FBgn0053864 FBgn0053865 FBgn0053868 FBgn0053870 FBgn0053872 FBgn0053874
2L	13120000	13140000	1	0.997473	FBgn0032471
3L	2920000	2940000	1	0.99747
3L	4900000	4920000	1	0.997463
2L	13980000	14000000	1	0.997439	FBgn0028939
3R	9294278	9314278	1	0.99743
2L	14280000	14300000	1	0.997422	FBgn0263648 FBgn0263649
3L	19706900	19726900	1	0.997389	FBgn0262516
2R	18572495	18592495	1	0.997283
3R	13194278	13214278	1	0.997275
2L	9000000	9020000	1	0.997179	FBgn0032087 FBgn0032088 FBgn0032089
3L	1300000	1320000	1	0.997095	FBgn0010333 FBgn0035206 FBgn0035203 FBgn0035205 FBgn0035207 FBgn0035204
3L	2260000	2280000	1	0.997067	FBgn0052303 FBgn0267479 FBgn0035328 FBgn0041709 FBgn0035323 FBgn0035325 FBgn0000543 FBgn0052302 FBgn0052304
2L	21420000	21440000	1	0.997064	FBgn0053728 FBgn0051613 FBgn0053727 FBgn0053806 FBgn0053807 FBgn0053808 FBgn0053809 FBgn0053810 FBgn0053811 FBgn0053904 FBgn0053905 FBgn0053906 FBgn0053907 FBgn0053803 FBgn0051617 FBgn0051618 FBgn0053804 FBgn0053805 FBgn0053908 FBgn0051611 FBgn0061209
2L	3780000	3800000	1	0.996986	FBgn0051960 FBgn0051958
2L	16080000	16100000	1	0.996986	FBgn0028520
2L	14340000	14360000	1	0.996975	FBgn0266144 FBgn0262354 FBgn0015791 FBgn0266145 FBgn0261535 FBgn0261534 FBgn0028530 FBgn0264253
2L	14080000	14100000	1	0.996865
2L	12460000	12480000	1	0.996771	FBgn0262203
2L	22400000	22420000	1	0.996762
3R	19594278	19614278	1	0.996664	FBgn0038718 FBgn0038715 FBgn0038716 FBgn0038717 FBgn0038714
2L	16760000	16780000	1	0.99666
2L	14820000	14840000	1	0.996632
3R	13154278	13174278	1	0.996608
3L	23126900	23146900	1	0.99658	FBgn0084017
3L	1500000	1520000	1	0.996564	FBgn0011204
2L	14520000	14540000	1	0.99656	FBgn0011866 FBgn0011865 FBgn0053648 FBgn0266146
3R	30554278	30574278	1	0.996555	FBgn0083991
3R	13314278	13334278	1	0.99652	FBgn0038139 FBgn0266455
2L	16520000	16540000	1	0.996371	FBgn0263555 FBgn0086038 FBgn0266895 FBgn0266894
3R	14174278	14194278	1	0.996345
2L	14980000	15000000	1	0.996305
3R	26494278	26514278	1	0.996291	FBgn0267752
2L	4060000	4080000	1	0.995981	FBgn0266319
2L	2260000	2280000	1	0.99586	FBgn0054049 FBgn0031407 FBgn0264084 FBgn0250841
2L	15160000	15180000	1	0.995829	FBgn0265995
3L	5040000	5060000	1	0.995819	FBgn0264476
3R	30314278	30334278	1	0.995766
2L	7340000	7360000	1	0.995634
2L	12560000	12580000	1	0.995433	FBgn0265808 FBgn0265809
2L	12540000	12560000	1	0.995421	FBgn0261709
2L	12500000	12520000	1	0.995415	FBgn0263458 FBgn0262353
3L	9266900	9286900	1	0.995379
2L	14620000	14640000	1	0.995364
2L	2460000	2480000	1	0.995183	FBgn0012016 FBgn0266824
2L	2380000	2400000	1	0.995068	FBgn0031423 FBgn0031422 FBgn0264672 FBgn0264081
2L	15260000	15280000	1	0.995037	FBgn0261268 FBgn0263765 FBgn0086691
2L	15180000	15200000	1	0.995024
2L	11680000	11700000	1	0.995011	FBgn0032372
2R	15332495	15352495	1	0.994997
2L	13760000	13780000	1	0.994961	FBgn0263206 FBgn0051845
3R	23034278	23054278	1	0.99486	FBgn0039042 FBgn0041225 FBgn0039044 FBgn0265157 FBgn0039041 FBgn0039043
2L	14460000	14480000	1	0.99484
2L	22847268	22867268	1	0.994684
3L	15926900	15946900	1	0.994468
3L	13806900	13826900	1	0.994462
2R	20372495	20392495	1	0.994453
2L	14220000	14240000	1	0.994446	FBgn0265940 FBgn0265941
2L	2420000	2440000	1	0.99435	FBgn0266217 FBgn0031428 FBgn0264988
2L	1780000	1800000	1	0.99433	FBgn0045498 FBgn0045501 FBgn0045500 FBgn0045497 FBgn0265138
3R	12914278	12934278	1	0.994282	FBgn0265167
2L	7880000	7900000	1	0.994218	FBgn0051902 FBgn0083968 FBgn0053121 FBgn0261790 FBgn0031961
2L	8440000	8460000	1	0.994189	FBgn0051897 FBgn0027780
2L	2540000	2560000	1	0.994012	FBgn0264944 FBgn0031431
2L	15100000	15120000	1	0.993782	FBgn0001978 FBgn0028878
2L	10660000	10680000	1	0.993674	FBgn0051871 FBgn0040496
3L	18886900	18906900	1	0.993633	FBgn0036825 FBgn0036822 FBgn0086661 FBgn0036827 FBgn0027057 FBgn0036826 FBgn0036824
2L	13780000	13800000	1	0.993593	FBgn0024846 FBgn0028539 FBgn0028931 FBgn0028538 FBgn0266141 FBgn0028932
2L	2680000	2700000	1	0.993574	FBgn0031446
2L	2400000	2420000	1	0.993517	FBgn0051948 FBgn0031426 FBgn0085477
2L	10880000	10900000	1	0.993456	FBgn0265683 FBgn0265684 FBgn0032312
3L	2940000	2960000	1	0.993416	FBgn0052846
2L	4120000	4140000	1	0.993403	FBgn0020376 FBgn0014033
3R	26274278	26294278	1	0.993321
3R	26994278	27014278	1	0.993288	FBgn0039471 FBgn0039470 FBgn0039469 FBgn0051077
2L	4600000	4620000	1	0.993211
3L	5286900	5306900	1	0.993015
3L	5020000	5040000	1	0.992965
2L	15200000	15220000	1	0.992924	FBgn0259965 FBgn0265085 FBgn0262875 FBgn0263089
3L	11606900	11626900	1	0.992853	FBgn0262021 FBgn0036183 FBgn0086254 FBgn0036181
2R	19232495	19252495	1	0.992849	FBgn0053454 FBgn0004003
2L	9460000	9480000	1	0.992846	FBgn0264269
3R	18034278	18054278	1	0.992842	FBgn0010389
2L	13140000	13160000	1	0.992697	FBgn0265088 FBgn0040972 FBgn0032472
3L	23506900	23526900	1	0.992625
2L	8600000	8620000	1	0.992513
2L	7860000	7880000	1	0.992392	FBgn0011861 FBgn0045038 FBgn0031959 FBgn0266904
2L	3400000	3420000	1	0.992208	FBgn0051952 FBgn0031531
2L	13580000	13600000	1	0.992123	FBgn0028513 FBgn0266308
3R	10694278	10714278	1	0.991999	FBgn0037824 FBgn0037826 FBgn0051373 FBgn0051278 FBgn0037822 FBgn0051467 FBgn0020385 FBgn0051391
3L	8786900	8806900	1	0.991969	FBgn0052023 FBgn0085455 FBgn0035926 FBgn0035929 FBgn0035928 FBgn0085456
3L	16186900	16206900	1	0.991949	FBgn0053689 FBgn0053688 FBgn0053690 FBgn0053687 FBgn0266986
3R	17854278	17874278	1	0.991777
3L	2240000	2260000	1	0.991755	FBgn0052305 FBgn0052301 FBgn0015359 FBgn0035321
2L	16640000	16660000	1	0.991751
3R	13454278	13474278	1	0.991736	FBgn0262323 FBgn0267574 FBgn0040554
2L	15380000	15400000	1	0.991679	FBgn0266153 FBgn0266154 FBgn0266913
2R	9352495	9372495	1	0.991679	FBgn0040775
2L	13960000	13980000	1	0.991659	FBgn0028430 FBgn0027929 FBgn0028936 FBgn0259896 FBgn0028542 FBgn0054003 FBgn0028543 FBgn0028940
2L	12060000	12080000	1	0.991612	FBgn0032406 FBgn0032405
3R	20234278	20254278	1	0.991522	FBgn0267710
3L	920000	940000	1	0.991509
2L	4540000	4560000	1	0.991358
2R	5552495	5572495	1	0.99133
3R	22294278	22314278	1	0.991321	FBgn0263834 FBgn0263835 FBgn0038938
2L	9320000	9340000	1	0.991202	FBgn0032109 FBgn0010314 FBgn0267012 FBgn0267013
2L	19840000	19860000	1	0.991146
2L	14100000	14120000	1	0.991055	FBgn0028904 FBgn0051769 FBgn0028526
3L	14826900	14846900	1	0.991009
3L	17086900	17106900	1	0.990993
2L	3720000	3740000	1	0.990979
3R	20374278	20394278	1	0.990924
2L	14540000	14560000	1	0.990895	FBgn0266148 FBgn0266147 FBgn0250844
2L	13040000	13060000	1	0.990889
2R	16632495	16652495	1	0.990888	FBgn0024232
2L	12980000	13000000	1	0.990874
2R	22512495	22532495	1	0.99047
2L	8660000	8680000	1	0.99035	FBgn0051889 FBgn0001114 FBgn0032057
3L	1040000	1060000	1	0.990324
2L	13740000	13760000	1	0.990255	FBgn0262332 FBgn0262272 FBgn0267573 FBgn0266140
2L	1520000	1540000	1	0.990244	FBgn0026398 FBgn0026397 FBgn0264881
2L	14580000	14600000	1	0.990192	FBgn0028911 FBgn0028912 FBgn0028910 FBgn0261566
2R	18012495	18032495	1	0.990113	FBgn0034289 FBgn0034288
2R	19212495	19232495	1	0.990097	FBgn0034422
2L	8820000	8840000	1	0.989932	FBgn0029123
2L	13260000	13280000	1	0.989887	FBgn0051848
2L	14900000	14920000	1	0.989587
3R	30674278	30694278	1	0.989578	FBgn0039795
3L	9066900	9086900	1	0.989565	FBgn0035960 FBgn0035959
2L	1540000	1560000	1	0.989504
2L	1660000	1680000	1	0.989459
2L	2740000	2760000	1	0.989446	FBgn0031453 FBgn0265997 FBgn0031455 FBgn0031454 FBgn0250906 FBgn0031451 FBgn0031452
2L	3380000	3400000	1	0.989436	FBgn0259949 FBgn0085204 FBgn0266026 FBgn0266027 FBgn0259950 FBgn0266839
2L	1560000	1580000	1	0.9894
2L	14360000	14380000	1	0.989328	FBgn0015546
2L	3700000	3720000	1	0.989259	FBgn0031564 FBgn0259955 FBgn0259956 FBgn0031566 FBgn0015376 FBgn0051777 FBgn0040104 FBgn0265370 FBgn0259957 FBgn0262621 FBgn0051778 FBgn0051955
2L	12900000	12920000	1	0.989175	FBgn0040508
3L	9526900	9546900	1	0.989145	FBgn0036009 FBgn0036010
3L	18526900	18546900	1	0.989119	FBgn0052198
2L	15800000	15820000	1	0.989041	FBgn0262150 FBgn0265813
2L	10700000	10720000	1	0.988979	FBgn0024740 FBgn0265580 FBgn0032287
3R	11034278	11054278	1	0.988938
2L	14060000	14080000	1	0.988926
3R	10674278	10694278	1	0.988912	FBgn0265161 FBgn0037819 FBgn0037818
2L	3820000	3840000	1	0.988907	FBgn0003430 FBgn0004567
2R	21652495	21672495	1	0.98887	FBgn0034645 FBgn0259725 FBgn0259708 FBgn0259710 FBgn0265961 FBgn0259711 FBgn0034650 FBgn0034649 FBgn0259727 FBgn0259726 FBgn0034646 FBgn0264327 FBgn0034647 FBgn0259709
3L	2420000	2440000	1	0.988782
2L	14240000	14260000	1	0.988718	FBgn0265147
2L	8800000	8820000	1	0.988715
2L	9200000	9220000	1	0.988683
2R	17992495	18012495	1	0.988675	FBgn0265592
2L	12660000	12680000	1	0.988622	FBgn0032442
2L	16680000	16700000	1	0.988293	FBgn0262413 FBgn0262452 FBgn0262430 FBgn0262386 FBgn0267347 FBgn0261278 FBgn0053552 FBgn0266310 FBgn0051807
3R	30394278	30414278	1	0.988227	FBgn0267130
2L	16240000	16260000	1	0.98822	FBgn0262000 FBgn0024734 FBgn0028515
2L	15320000	15340000	1	0.988089	FBgn0001981
3L	10686900	10706900	1	0.988062	FBgn0047038 FBgn0053493 FBgn0036099 FBgn0036101
2L	3360000	3380000	1	0.987909	FBgn0016698 FBgn0031529 FBgn0031528
2L	12640000	12660000	1	0.987822
2R	21812495	21832495	1	0.987727	FBgn0034662
3R	20174278	20194278	1	0.987618
2L	15980000	16000000	1	0.987618	FBgn0263331
2R	19192495	19212495	1	0.98759
3R	26354278	26374278	1	0.987481
2L	18880000	18900000	1	0.987256	FBgn0265950
2L	14860000	14880000	1	0.987173	FBgn0032553 FBgn0032554 FBgn0267291
2L	16560000	16580000	1	0.987146
2L	4080000	4100000	1	0.986898	FBgn0086032
2L	16740000	16760000	1	0.986891	FBgn0032601 FBgn0032600 FBgn0261068
2L	13280000	13300000	1	0.986878	FBgn0028406 FBgn0266307 FBgn0040973 FBgn0264892 FBgn0032499
2L	13180000	13200000	1	0.986728	FBgn0032478 FBgn0032480 FBgn0032479 FBgn0051849
2L	11800000	11820000	1	0.986641	FBgn0032378
2L	14400000	14420000	1	0.98651	FBgn0264810 FBgn0265946
2L	3220000	3240000	1	0.986487
2L	15840000	15860000	1	0.986292	FBgn0264263 FBgn0028903 FBgn0028902 FBgn0267258
2L	1060000	1080000	1	0.986124
2L	10560000	10580000	1	0.986037	FBgn0032268 FBgn0032269
2L	4160000	4180000	1	0.985954	FBgn0026394
2L	2900000	2920000	1	0.985863
2L	16700000	16720000	1	0.98579	FBgn0086907 FBgn0062978 FBgn0263745
3R	13294278	13314278	1	0.985742	FBgn0038135 FBgn0038136 FBgn0262844 FBgn0052473 FBgn0264991
2R	21632495	21652495	1	0.985656	FBgn0034643 FBgn0050284
2L	2440000	2460000	1	0.985512
2L	9240000	9260000	1	0.98523	FBgn0040097 FBgn0032104 FBgn0032105 FBgn0263985
2L	14300000	14320000	1	0.985128
2R	18672495	18692495	1	0.985064	FBgn0265625 FBgn0265626 FBgn0265627 FBgn0262102
2L	14700000	14720000	1	0.985016	FBgn0028855 FBgn0085194
2L	16220000	16240000	1	0.984918
3R	22234278	22254278	1	0.984707
2L	5560000	5580000	1	0.984324	FBgn0041719 FBgn0266029
2L	4180000	4200000	1	0.984278	FBgn0264866 FBgn0267441 FBgn0031589 FBgn0040102 FBgn0051961
2R	13712495	13732495	1	0.984252
2R	11192495	11212495	1	0.984214
2L	16200000	16220000	1	0.98421	FBgn0265949 FBgn0264392 FBgn0028893
2L	10720000	10740000	1	0.984035	FBgn0032289 FBgn0032294 FBgn0027868 FBgn0032292 FBgn0032293 FBgn0032290 FBgn0032291
3R	25734278	25754278	1	0.984032	FBgn0267771
3R	23014278	23034278	1	0.983959	FBgn0039039
2L	6140000	6160000	1	0.983885	FBgn0040950 FBgn0051639
3L	1140000	1160000	1	0.983665
3R	28154278	28174278	1	0.983522
2L	4000000	4020000	1	0.983462	FBgn0264296 FBgn0264295 FBgn0031579 FBgn0085205 FBgn0031580 FBgn0264341 FBgn0266883
2L	13220000	13240000	1	0.983379	FBgn0027586 FBgn0032493 FBgn0032491 FBgn0032492 FBgn0032488 FBgn0032490 FBgn0032489 FBgn0032487
3L	17166900	17186900	1	0.983331
3R	28034278	28054278	1	0.983328
2L	15940000	15960000	1	0.983229	FBgn0028857 FBgn0028856
2L	12420000	12440000	1	0.983102	FBgn0263469 FBgn0032428 FBgn0263468 FBgn0032429 FBgn0265298 FBgn0032430 FBgn0032431
3R	13254278	13274278	1	0.9828	FBgn0003598 FBgn0040551 FBgn0038129 FBgn0038128
2L	6060000	6080000	1	0.982793	FBgn0266449 FBgn0031771 FBgn0031777 FBgn0031775 FBgn0085209 FBgn0031772 FBgn0031774 FBgn0031773 FBgn0031776 FBgn0031778 FBgn0264345
2L	15340000	15360000	1	0.982755
3R	20094278	20114278	1	0.98261	FBgn0051206
2L	13440000	13460000	1	0.982487	FBgn0032525 FBgn0032524 FBgn0267244 FBgn0261991
2R	20112495	20132495	1	0.982199
2L	9300000	9320000	1	0.98214	FBgn0262033
2L	2880000	2900000	1	0.982064	FBgn0024947
3R	13114278	13134278	1	0.981717
2L	17320000	17340000	1	0.981608	FBgn0267255
2L	2500000	2520000	1	0.981493	FBgn0265818 FBgn0031430 FBgn0267738
3R	13434278	13454278	1	0.981377	FBgn0261814 FBgn0267239
3L	24006900	24026900	1	0.981307	FBgn0058053
2L	16960000	16980000	1	0.981257	FBgn0266823
2L	4840000	4860000	1	0.981236	FBgn0031640 FBgn0031638 FBgn0031639 FBgn0031637
2L	2180000	2200000	1	0.981206	FBgn0051946 FBgn0265017 FBgn0085201 FBgn0264874 FBgn0264875 FBgn0031395 FBgn0266828
2L	6440000	6460000	1	0.981174	FBgn0031815 FBgn0031814
3R	19614278	19634278	1	0.981154	FBgn0038720
2L	7700000	7720000	1	0.981128	FBgn0012018 FBgn0266325 FBgn0041181 FBgn0053296 FBgn0031935 FBgn0267326
2L	13320000	13340000	1	0.981124
2L	19580000	19600000	1	0.981062	FBgn0032814 FBgn0032813 FBgn0032812
2L	17360000	17380000	1	0.981005	FBgn0051804 FBgn0265446
2L	4800000	4820000	1	0.980901	FBgn0031631 FBgn0263577 FBgn0031630 FBgn0266835
2L	16580000	16600000	1	0.980887
3L	2460000	2480000	1	0.98077	FBgn0035344 FBgn0035343
3R	29874278	29894278	1	0.980767
3R	17214278	17234278	1	0.98052	FBgn0051262
2L	15560000	15580000	1	0.980411
2L	15960000	15980000	1	0.980397	FBgn0264347
2L	16800000	16820000	1	0.9803	FBgn0086673
2L	16260000	16280000	1	0.980135	FBgn0028897
2R	4652495	4672495	1	0.98
2L	4260000	4280000	1	0.979913
2L	2860000	2880000	1	0.979906	FBgn0031476 FBgn0051694 FBgn0031479 FBgn0051950 FBgn0031478
3R	17314278	17334278	1	0.979903
2L	3980000	4000000	1	0.979626
3R	27714278	27734278	1	0.979534
2L	14560000	14580000	1	0.979523	FBgn0266149 FBgn0266150 FBgn0028913
3L	3600000	3620000	1	0.979357	FBgn0035453 FBgn0035452
2L	14260000	14280000	1	0.979171	FBgn0052971 FBgn0265942
2L	16000000	16020000	1	0.979141	FBgn0085196 FBgn0266138 FBgn0051820 FBgn0264373 FBgn0045827 FBgn0264364 FBgn0264374
2L	1860000	1880000	1	0.97914	FBgn0031372 FBgn0264884
2L	9020000	9040000	1	0.978752	FBgn0265452 FBgn0032090
3R	30534278	30554278	1	0.978729
2L	5580000	5600000	1	0.978588	FBgn0031724 FBgn0031723
2L	17420000	17440000	1	0.978462	FBgn0032636 FBgn0053928 FBgn0265582
2L	3180000	3200000	1	0.978392
2L	2780000	2800000	1	0.977987	FBgn0264369
3R	12574278	12594278	1	0.97775
3L	10166900	10186900	1	0.977701
2R	17252495	17272495	1	0.977656	FBgn0263708 FBgn0267659 FBgn0262961 FBgn0262568
2R	16612495	16632495	1	0.977637
2L	14440000	14460000	1	0.977555	FBgn0028844 FBgn0265943 FBgn0267290
2L	11100000	11120000	1	0.977307	FBgn0032341 FBgn0041246 FBgn0032343 FBgn0261983
2L	22380000	22400000	1	0.977186
3R	23054278	23074278	1	0.976849	FBgn0039048 FBgn0027526 FBgn0053193 FBgn0039045
3R	19954278	19974278	1	0.976756
2L	15500000	15520000	1	0.976519	FBgn0266158
3R	17874278	17894278	1	0.976394
2L	1940000	1960000	1	0.976237	FBgn0040719 FBgn0053673
3R	17514278	17534278	1	0.976012	FBgn0265449
3R	17334278	17354278	1	0.975898
2R	18332495	18352495	1	0.975656
3L	15406900	15426900	1	0.975537	FBgn0036495
2L	10160000	10180000	1	0.975266	FBgn0032188
2L	3320000	3340000	1	0.974888	FBgn0053281 FBgn0053282 FBgn0031523 FBgn0031520 FBgn0031522
3R	26234278	26254278	1	0.974883	FBgn0267730 FBgn0267731
2L	15880000	15900000	1	0.97476	FBgn0051735 FBgn0041183 FBgn0265668 FBgn0051824
2L	8280000	8300000	1	0.974621	FBgn0011902 FBgn0264083
2R	18652495	18672495	1	0.974598	FBgn0053136 FBgn0034372 FBgn0259202
2L	13240000	13260000	1	0.974516	FBgn0041720 FBgn0003935 FBgn0051728 FBgn0051730 FBgn0032495 FBgn0051851 FBgn0266869
3L	13266900	13286900	1	0.974363	FBgn0052123 FBgn0267316 FBgn0262622 FBgn0264514
2L	4820000	4840000	1	0.974145	FBgn0263575 FBgn0031633 FBgn0031635 FBgn0031634 FBgn0031632
3R	21594278	21614278	1	0.974036
2R	11172495	11192495	1	0.974028
3R	20494278	20514278	1	0.974006	FBgn0038798 FBgn0038799 FBgn0038797 FBgn0002869
2R	22572495	22592495	1	0.973874
2L	16420000	16440000	1	0.973825
2L	2480000	2500000	1	0.973808	FBgn0011818 FBgn0264978
3L	11266900	11286900	1	0.973618	FBgn0265931 FBgn0266953
2R	17932495	17952495	1	0.97354
2L	11440000	11460000	1	0.973387
3R	13694278	13714278	1	0.973198	FBgn0038173 FBgn0051469 FBgn0054044 FBgn0002937 FBgn0040076 FBgn0040077 FBgn0038172 FBgn0028487
2L	13720000	13740000	1	0.972997	FBgn0051813 FBgn0028847
2L	14160000	14180000	1	0.97295	FBgn0263037
2L	3340000	3360000	1	0.972843	FBgn0031526
2L	8700000	8720000	1	0.972824	FBgn0032061 FBgn0266327
3R	17054278	17074278	1	0.972749	FBgn0038474 FBgn0038473
2L	5840000	5860000	1	0.972739
2L	10840000	10860000	1	0.972236	FBgn0004363 FBgn0263560 FBgn0024227 FBgn0260453 FBgn0260454 FBgn0262599 FBgn0027453 FBgn0069354
2L	12840000	12860000	1	0.972213	FBgn0266305 FBgn0266306
2R	12792495	12812495	1	0.971958	FBgn0040755
2L	15300000	15320000	1	0.971744	FBgn0041103
2L	3960000	3980000	1	0.971469
3R	18914278	18934278	1	0.970961	FBgn0038662 FBgn0261113
2L	11780000	11800000	1	0.970635	FBgn0032376 FBgn0086036 FBgn0032374 FBgn0032377 FBgn0032375
2L	11880000	11900000	1	0.970343
2R	19292495	19312495	1	0.970314	FBgn0086358 FBgn0034433 FBgn0034432
3R	17234278	17254278	1	0.970289	FBgn0265199
3L	7986900	8006900	1	0.970256
3R	12554278	12574278	1	0.970237
3L	7046900	7066900	1	0.970108
3R	15714278	15734278	1	0.970056	FBgn0085303 FBgn0051294
2L	5720000	5740000	1	0.969846	FBgn0031733 FBgn0024191
3L	13306900	13326900	1	0.969731	FBgn0265751
2L	9360000	9380000	1	0.969543	FBgn0264447 FBgn0085210 FBgn0263323
3R	12814278	12834278	1	0.969285	FBgn0267937
3R	20334278	20354278	1	0.96921	FBgn0038789
3R	17394278	17414278	1	0.968538	FBgn0262005 FBgn0261932 FBgn0038505 FBgn0085308 FBgn0085309 FBgn0038504 FBgn0038506 FBgn0038507 FBgn0262006 FBgn0262003
2L	1080000	1100000	1	0.968139	FBgn0031298
3R	17414278	17434278	1	0.967871	FBgn0267701 FBgn0267719 FBgn0267720 FBgn0053333 FBgn0038509 FBgn0262024 FBgn0038508 FBgn0262023
2L	15460000	15480000	1	0.967592	FBgn0266157 FBgn0003448 FBgn0266893
2L	15280000	15300000	1	0.967178	FBgn0028850 FBgn0028852 FBgn0264264 FBgn0011239 FBgn0028853 FBgn0266888
2L	8740000	8760000	1	0.967149	FBgn0032065 FBgn0266845
2L	4680000	4700000	1	0.967053	FBgn0000227 FBgn0031620 FBgn0031621 FBgn0031622
2R	17912495	17932495	1	0.966988
3R	26554278	26574278	1	0.966899
3R	20394278	20414278	1	0.966857	FBgn0038795 FBgn0038796
3R	13394278	13414278	1	0.966857	FBgn0038149 FBgn0038148 FBgn0038151 FBgn0038150 FBgn0053977 FBgn0040553
3L	17506900	17526900	1	0.966712	FBgn0036733 FBgn0036734
2L	8780000	8800000	1	0.966598	FBgn0261627
2L	14120000	14140000	1	0.966461
3L	16206900	16226900	1	0.966393	FBgn0052153 FBgn0036577 FBgn0264483
3L	9206900	9226900	1	0.966329	FBgn0035969 FBgn0266957
2L	15220000	15240000	1	0.966267
2L	5920000	5940000	1	0.96611	FBgn0015381 FBgn0031751 FBgn0264547
2R	13292495	13312495	1	0.966102	FBgn0033826 FBgn0033827
2R	16652495	16672495	1	0.965589	FBgn0024319 FBgn0024315 FBgn0085486
2L	14780000	14800000	1	0.96524	FBgn0028867 FBgn0028866 FBgn0032551
3R	15674278	15694278	1	0.965086	FBgn0051446
2R	16532495	16552495	1	0.965029	FBgn0259795
2L	16880000	16900000	1	0.964997	FBgn0265542 FBgn0260758 FBgn0040985
2L	5520000	5540000	1	0.964932	FBgn0031711 FBgn0031715 FBgn0266028 FBgn0051648 FBgn0051915 FBgn0051989 FBgn0031710 FBgn0031716 FBgn0031713 FBgn0000318
2L	16860000	16880000	1	0.964866	FBgn0052832 FBgn0264440 FBgn0032615 FBgn0051781
2L	6160000	6180000	1	0.964856	FBgn0031786
2L	5540000	5560000	1	0.964799	FBgn0031718 FBgn0004620 FBgn0031721 FBgn0031717 FBgn0031719 FBgn0031720 FBgn0002525
2L	2120000	2140000	1	0.964755	FBgn0004507 FBgn0031389
2L	17340000	17360000	1	0.964619	FBgn0265445 FBgn0265270
2L	14480000	14500000	1	0.964608	FBgn0028882 FBgn0265944 FBgn0005771 FBgn0266841
2R	18772495	18792495	1	0.964589	FBgn0034390 FBgn0264679
2L	10960000	10980000	1	0.96457	FBgn0032321 FBgn0010612 FBgn0032322 FBgn0000018 FBgn0053129
2R	19592495	19612495	1	0.96451	FBgn0034459 FBgn0265666 FBgn0265667
2L	13540000	13560000	1	0.964466	FBgn0032530 FBgn0028942 FBgn0028941
3L	16346900	16366900	1	0.964415	FBgn0052357 FBgn0266417 FBgn0267554 FBgn0036617 FBgn0036618 FBgn0036615 FBgn0011693 FBgn0036614 FBgn0260460
3R	13994278	14014278	1	0.964313
2L	3040000	3060000	1	0.964288	FBgn0003934 FBgn0042627 FBgn0031501 FBgn0263847
3R	11154278	11174278	1	0.963911	FBgn0040253 FBgn0026315 FBgn0026314 FBgn0040257 FBgn0040259 FBgn0027584 FBgn0040255
3R	12774278	12794278	1	0.963664
3R	12834278	12854278	1	0.963577	FBgn0265165 FBgn0038087 FBgn0267147
2L	3940000	3960000	1	0.963547
2L	15420000	15440000	1	0.963448	FBgn0266155 FBgn0001983 FBgn0028892
2R	12692495	12712495	1	0.963418	FBgn0033770
3R	20454278	20474278	1	0.963372
2L	3620000	3640000	1	0.962994	FBgn0263523 FBgn0031554
2L	17440000	17460000	1	0.962957	FBgn0032638 FBgn0267923 FBgn0032637 FBgn0032639
2R	12152495	12172495	1	0.962405	FBgn0262300 FBgn0262423 FBgn0262394 FBgn0267913 FBgn0033687 FBgn0033688 FBgn0023167 FBgn0040759 FBgn0085261 FBgn0263485
3L	2280000	2300000	1	0.962178
2L	1500000	1520000	1	0.962004	FBgn0264873 FBgn0001174 FBgn0031345 FBgn0031344
2L	2840000	2860000	1	0.961953	FBgn0031468 FBgn0031469 FBgn0015521 FBgn0031473 FBgn0031471 FBgn0031470 FBgn0031472 FBgn0266881
3R	25814278	25834278	1	0.96195	FBgn0039376 FBgn0266254 FBgn0011668 FBgn0011669 FBgn0261061 FBgn0011670
2L	16600000	16620000	1	0.961658	FBgn0032590 FBgn0051815
3L	6086900	6106900	1	0.961368	FBgn0035678 FBgn0267663 FBgn0061492 FBgn0035679
2L	12700000	12720000	1	0.961212	FBgn0032453 FBgn0032451 FBgn0032454 FBgn0032452 FBgn0032450
3R	19534278	19554278	1	0.961121
2R	20132495	20152495	1	0.96107	FBgn0265846 FBgn0265847 FBgn0034481 FBgn0265845 FBgn0266764
3L	10286900	10306900	1	0.960824
2L	7540000	7560000	1	0.960797
3L	11086900	11106900	1	0.960603	FBgn0052071 FBgn0261112 FBgn0052072 FBgn0036128 FBgn0036126 FBgn0083068 FBgn0036125
2R	17172495	17192495	1	0.960546	FBgn0265537 FBgn0265539 FBgn0265538 FBgn0266862
2L	16720000	16740000	1	0.960391	FBgn0262438 FBgn0032596 FBgn0051812 FBgn0032597 FBgn0015391 FBgn0027779 FBgn0263746 FBgn0032595
3R	12594278	12614278	1	0.960297
3L	10126900	10146900	1	0.959977	FBgn0267539
2L	8000000	8020000	1	0.959885	FBgn0054010 FBgn0031974 FBgn0031973
2L	17600000	17620000	1	0.95978	FBgn0265585
3R	12634278	12654278	1	0.959263	FBgn0038071 FBgn0038068 FBgn0038069 FBgn0038070 FBgn0038067
2L	4040000	4060000	1	0.959257
3R	10654278	10674278	1	0.959199
2L	14420000	14440000	1	0.95919	FBgn0028871 FBgn0265945
3L	16266900	16286900	1	0.958655	FBgn0040797 FBgn0036590 FBgn0040796 FBgn0036593 FBgn0036594 FBgn0036591 FBgn0036592 FBgn0036588 FBgn0085277 FBgn0036589
2L	3900000	3920000	1	0.958653	FBgn0051773
2L	13860000	13880000	1	0.958612	FBgn0266142
2R	18972495	18992495	1	0.958556	FBgn0267351 FBgn0034411
2L	3800000	3820000	1	0.958008	FBgn0031573 FBgn0021800 FBgn0264885 FBgn0264886
2L	10600000	10620000	1	0.957756
2L	14920000	14940000	1	0.957665	FBgn0028887
2L	12620000	12640000	1	0.957618
3L	16366900	16386900	1	0.957615	FBgn0042137 FBgn0036620 FBgn0036622 FBgn0036623 FBgn0036621
2L	5700000	5720000	1	0.957595	FBgn0031731 FBgn0266065 FBgn0031730 FBgn0054011
2L	16620000	16640000	1	0.957348	FBgn0265000
2L	8640000	8660000	1	0.957125
3R	12794278	12814278	1	0.95703
3L	2760000	2780000	1	0.95677	FBgn0035370 FBgn0035372 FBgn0035371
2L	4140000	4160000	1	0.956431	FBgn0031585
3L	23566900	23586900	1	0.956054
2L	14380000	14400000	1	0.955997
2L	15520000	15540000	1	0.955673	FBgn0264261
3R	19514278	19534278	1	0.955511
3L	16246900	16266900	1	0.955351	FBgn0036586 FBgn0036583 FBgn0040799 FBgn0040801 FBgn0036584 FBgn0040798 FBgn0036585 FBgn0085276
2R	16432495	16452495	1	0.95485	FBgn0034129 FBgn0034127 FBgn0034128
2L	16840000	16860000	1	0.954715	FBgn0032614 FBgn0051809 FBgn0051810
3R	17794278	17814278	1	0.953871	FBgn0038552 FBgn0038547 FBgn0038551 FBgn0038546 FBgn0038545 FBgn0038550 FBgn0038548 FBgn0038549
2R	19272495	19292495	1	0.953796	FBgn0034427 FBgn0034426 FBgn0034428 FBgn0013954 FBgn0034430 FBgn0034425 FBgn0034429
2R	13392495	13412495	1	0.95374	FBgn0041579 FBgn0033836 FBgn0033834 FBgn0033835 FBgn0267026
2R	6572495	6592495	1	0.953578
3R	15034278	15054278	1	0.953469	FBgn0038281 FBgn0266249
3R	23074278	23094278	1	0.953378
3R	27014278	27034278	1	0.953172	FBgn0039473 FBgn0039476 FBgn0039475 FBgn0039474 FBgn0039472
2R	17152495	17172495	1	0.952973	FBgn0050457 FBgn0034202 FBgn0050458 FBgn0034204 FBgn0034201
3R	22094278	22114278	1	0.952886	FBgn0038931
3R	17194278	17214278	1	0.952845
2L	16160000	16180000	1	0.952818	FBgn0264350
2L	2040000	2060000	1	0.952516	FBgn0026396 FBgn0028952 FBgn0266836
2R	15532495	15552495	1	0.952475	FBgn0267589 FBgn0050467 FBgn0022097 FBgn0034029 FBgn0034030 FBgn0034027 FBgn0050471
2R	18072495	18092495	1	0.952423	FBgn0266380
3R	25314278	25334278	1	0.952266	FBgn0039324 FBgn0039323 FBgn0045761 FBgn0039328 FBgn0039326 FBgn0039325
3L	6886900	6906900	1	0.952136
2R	19252495	19272495	1	0.952044	FBgn0034423 FBgn0053453 FBgn0265614
2L	11480000	11500000	1	0.951927	FBgn0003313 FBgn0263087 FBgn0032361
3R	20714278	20734278	1	0.95191	FBgn0051205
3L	23486900	23506900	1	0.951558
3R	14634278	14654278	1	0.951447
3R	19574278	19594278	1	0.951327	FBgn0065080
3L	16686900	16706900	1	0.951145	FBgn0267557 FBgn0036654 FBgn0266689
2L	6360000	6380000	1	0.951024	FBgn0266004 FBgn0031805 FBgn0043854
2L	1980000	2000000	1	0.950922	FBgn0262148 FBgn0031378 FBgn0001125 FBgn0031379 FBgn0031381 FBgn0043539
2L	13940000	13960000	1	0.950506	FBgn0028544
3R	15734278	15754278	1	0.950465	FBgn0038355
2L	10480000	10500000	1	0.950373	FBgn0032260 FBgn0026431 FBgn0032259 FBgn0032258
2R	12232495	12252495	1	0.950369	FBgn0263021 FBgn0265374 FBgn0033703 FBgn0263020 FBgn0262889 FBgn0265372
2L	13520000	13540000	1	0.950268	FBgn0053645 FBgn0028943 FBgn0053640 FBgn0053643 FBgn0053644 FBgn0053641 FBgn0053642
2L	15780000	15800000	1	0.949371	FBgn0028901
3L	18386900	18406900	1	0.949341	FBgn0011706
2L	11760000	11780000	1	0.949338
3R	17134278	17154278	1	0.949224	FBgn0264291 FBgn0038484 FBgn0038490 FBgn0038485 FBgn0038486 FBgn0038491 FBgn0038488 FBgn0038487
2L	18180000	18200000	1	0.949203	FBgn0267486 FBgn0266205
2L	9380000	9400000	1	0.949167	FBgn0012036 FBgn0032115
2L	4240000	4260000	1	0.948989	FBgn0265269 FBgn0264867 FBgn0264868 FBgn0266834 FBgn0266833 FBgn0266832 FBgn0267284
2R	12212495	12232495	1	0.948616	FBgn0033702 FBgn0033701
2L	1960000	1980000	1	0.948457	FBgn0267972 FBgn0051942
2R	20352495	20372495	1	0.948187	FBgn0034507
3R	9274278	9294278	1	0.948064
2R	23532477	23552477	1	0.947936	FBgn0041234 FBgn0041233 FBgn0050181 FBgn0034877 FBgn0050185 FBgn0034876
3R	21754278	21774278	1	0.947632	FBgn0259237 FBgn0038901 FBgn0051198
2L	10680000	10700000	1	0.947158	FBgn0265070 FBgn0032285 FBgn0032281 FBgn0032284 FBgn0032283 FBgn0032282 FBgn0265069 FBgn0032280 FBgn0032286
3R	26294278	26314278	1	0.946878
3L	11826900	11846900	1	0.946494	FBgn0036214 FBgn0262366
2L	10780000	10800000	1	0.945978	FBgn0051870 FBgn0265793
2L	2660000	2680000	1	0.945885	FBgn0041248 FBgn0031444
3R	11954278	11974278	1	0.945879	FBgn0000147 FBgn0260743 FBgn0037970 FBgn0013276 FBgn0260742 FBgn0260741
3R	21114278	21134278	1	0.945868	FBgn0038859 FBgn0267841 FBgn0010770 FBgn0038860 FBgn0038861 FBgn0038858 FBgn0038857
2L	6120000	6140000	1	0.945801	FBgn0031784 FBgn0266071 FBgn0261683 FBgn0031781 FBgn0261697 FBgn0267283 FBgn0031782
2L	3260000	3280000	1	0.945682	FBgn0265677 FBgn0031513 FBgn0266877 FBgn0266876 FBgn0267270
3R	20314278	20334278	1	0.945588	FBgn0267450 FBgn0038788 FBgn0038787
3R	14874278	14894278	1	0.94557	FBgn0038271 FBgn0038272 FBgn0038268 FBgn0067628 FBgn0067629 FBgn0004597 FBgn0038269
2L	14180000	14200000	1	0.945477
2L	13380000	13400000	1	0.945379	FBgn0032519 FBgn0265810 FBgn0032515 FBgn0032517 FBgn0265811 FBgn0032520 FBgn0032516 FBgn0032518
2L	10760000	10780000	1	0.94522	FBgn0015320 FBgn0027550 FBgn0032299 FBgn0032298
3R	10854278	10874278	1	0.944634	FBgn0267376 FBgn0037843 FBgn0037844 FBgn0037848 FBgn0037845 FBgn0011768 FBgn0037846
2L	10220000	10240000	1	0.944542	FBgn0032197 FBgn0051720 FBgn0250843 FBgn0032195 FBgn0032198 FBgn0032196
2L	3660000	3680000	1	0.944475	FBgn0259952 FBgn0259953 FBgn0261054 FBgn0259951
2L	15860000	15880000	1	0.944395	FBgn0261925 FBgn0261924
2L	11040000	11060000	1	0.944383
3R	22994278	23014278	1	0.944242	FBgn0263408 FBgn0085404 FBgn0265156
2L	15900000	15920000	1	0.944155	FBgn0032577 FBgn0266161 FBgn0266162 FBgn0051821
3R	14014278	14034278	1	0.943969	FBgn0038194
3L	18206900	18226900	1	0.943676
2L	18900000	18920000	1	0.943605	FBgn0265951
3R	13514278	13534278	1	0.943312	FBgn0038157 FBgn0261846
2R	16452495	16472495	1	0.943003	FBgn0261292 FBgn0261293
2L	7900000	7920000	1	0.942531
3R	14894278	14914278	1	0.942227	FBgn0267918 FBgn0038273 FBgn0038277 FBgn0262514 FBgn0028662 FBgn0038275 FBgn0038274
2L	4920000	4940000	1	0.94196	FBgn0031649
2L	17000000	17020000	1	0.941889	FBgn0267018 FBgn0032624
3R	17934278	17954278	1	0.941657
3R	13494278	13514278	1	0.941441
3R	21274278	21294278	1	0.941358	FBgn0038880 FBgn0038879
2L	20440000	20460000	1	0.941165	FBgn0051687 FBgn0042175 FBgn0051683
3L	8226900	8246900	1	0.94065	FBgn0265089 FBgn0035861 FBgn0264604
2L	9140000	9160000	1	0.940635
3R	17594278	17614278	1	0.940509	FBgn0038525 FBgn0040565 FBgn0004554 FBgn0003375 FBgn0038523 FBgn0038524 FBgn0085310
2R	15752495	15772495	1	0.940497
3R	17434278	17454278	1	0.940381	FBgn0038510 FBgn0000564
3L	11866900	11886900	1	0.940076	FBgn0036217 FBgn0036218 FBgn0036219
3R	27434278	27454278	1	0.93952	FBgn0263401 FBgn0265317
2L	16280000	16300000	1	0.93911	FBgn0040079 FBgn0028896 FBgn0001992 FBgn0028375 FBgn0266204 FBgn0032582
2L	4760000	4780000	1	0.938546	FBgn0260428
3L	15286900	15306900	1	0.937936	FBgn0036492 FBgn0036491
2L	13340000	13360000	1	0.937715	FBgn0032506 FBgn0032505
3R	26434278	26454278	1	0.937637	FBgn0263118 FBgn0042710 FBgn0042711
2L	16900000	16920000	1	0.93759	FBgn0026150 FBgn0032620
3L	10146900	10166900	1	0.937248	FBgn0086076 FBgn0036070
3R	11894278	11914278	1	0.936916	FBgn0085336
2L	4200000	4220000	1	0.936792
2R	23392477	23412477	1	0.936731	FBgn0034859
3L	7486900	7506900	1	0.93669	FBgn0035790 FBgn0035792 FBgn0035791 FBgn0015033
3R	23974278	23994278	1	0.936241	FBgn0039135 FBgn0039137 FBgn0051451 FBgn0039136
2L	5740000	5760000	1	0.936169	FBgn0031735
3R	14934278	14954278	1	0.936118
2L	4340000	4360000	1	0.93592	FBgn0262375 FBgn0265908 FBgn0265909 FBgn0265910 FBgn0265911 FBgn0031596
2L	7780000	7800000	1	0.935874	FBgn0031948 FBgn0031946 FBgn0025687 FBgn0031947 FBgn0266072 FBgn0003961
2R	14472495	14492495	1	0.935836	FBgn0265655
3L	14806900	14826900	1	0.935668
3R	11174278	11194278	1	0.935356	FBgn0040252
2R	17952495	17972495	1	0.935192	FBgn0265591 FBgn0003140
2L	6100000	6120000	1	0.935122
2L	18160000	18180000	1	0.935009
3L	1220000	1240000	1	0.934991	FBgn0004430 FBgn0053966 FBgn0035193 FBgn0053965 FBgn0267311
2L	12320000	12340000	1	0.934898	FBgn0051862
2L	3420000	3440000	1	0.934879
3R	22074278	22094278	1	0.934801	FBgn0038930 FBgn0040582 FBgn0038929
2L	16780000	16800000	1	0.934248	FBgn0040261 FBgn0000406 FBgn0032603 FBgn0040262
2L	13460000	13480000	1	0.9342
2L	10740000	10760000	1	0.93395	FBgn0263528 FBgn0032296 FBgn0032297
3L	9946900	9966900	1	0.932998
3L	10266900	10286900	1	0.932929	FBgn0036080 FBgn0266777
2R	17972495	17992495	1	0.932628
2L	14140000	14160000	1	0.932348
3R	20854278	20874278	1	0.932151	FBgn0044812 FBgn0038837 FBgn0028396
3R	14974278	14994278	1	0.931649
2L	680000	700000	1	0.931592
2L	15080000	15100000	1	0.931592
3R	22174278	22194278	1	0.93132
3R	17894278	17914278	1	0.931193	FBgn0038558 FBgn0263399
3R	18654278	18674278	1	0.931183	FBgn0051231 FBgn0051230 FBgn0027841 FBgn0266388 FBgn0044871 FBgn0051229 FBgn0261065
2L	20200000	20220000	1	0.93067
2L	17120000	17140000	1	0.930656	FBgn0051784
2R	21712495	21732495	1	0.930638	FBgn0034657 FBgn0265963 FBgn0050404 FBgn0050398
3L	11246900	11266900	1	0.930447	FBgn0265924 FBgn0265928 FBgn0265927 FBgn0265926 FBgn0041094
3R	22114278	22134278	1	0.930342	FBgn0259736 FBgn0051423 FBgn0051424
3R	13774278	13794278	1	0.930079	FBgn0260464 FBgn0038183 FBgn0259721 FBgn0000454 FBgn0267150
3L	14146900	14166900	1	0.929967
2L	11460000	11480000	1	0.929797
3L	8006900	8026900	1	0.929792
3L	18226900	18246900	1	0.929766	FBgn0267597 FBgn0267598 FBgn0267599
2L	3560000	3580000	1	0.929474	FBgn0265960 FBgn0264370 FBgn0264363 FBgn0265368
3L	6106900	6126900	1	0.929422
2L	18760000	18780000	1	0.929408	FBgn0264348
3R	23854278	23874278	1	0.92923	FBgn0004185
3R	17034278	17054278	1	0.929225	FBgn0266053 FBgn0038471 FBgn0038472 FBgn0038470
2L	3920000	3940000	1	0.929214
2R	19312495	19332495	1	0.928903
2L	13560000	13580000	1	0.928684
2L	2580000	2600000	1	0.928608	FBgn0031437 FBgn0250835 FBgn0026479 FBgn0266025
3L	10106900	10126900	1	0.928555
3L	17666900	17686900	1	0.928447	FBgn0065088 FBgn0085280
2L	8940000	8960000	1	0.928033	FBgn0032079 FBgn0032077 FBgn0032078
3R	17174278	17194278	1	0.927734
3R	13414278	13434278	1	0.927689	FBgn0038153 FBgn0267151 FBgn0000046
2L	16400000	16420000	1	0.927539	FBgn0086037
2L	4280000	4300000	1	0.927498
2L	11020000	11040000	1	0.927174	FBgn0040967
2L	7600000	7620000	1	0.927134	FBgn0031925 FBgn0031926 FBgn0266910
3R	30294278	30314278	1	0.927061	FBgn0085329
2L	9700000	9720000	1	0.926894	FBgn0011207 FBgn0032138 FBgn0051710
2L	8840000	8860000	1	0.926883	FBgn0266905
2R	16472495	16492495	1	0.926836	FBgn0053458 FBgn0053459 FBgn0034131
3L	7026900	7046900	1	0.926769	FBgn0267482
2L	7280000	7300000	1	0.926624
3L	10666900	10686900	1	0.926149
2L	12520000	12540000	1	0.925173
3L	1420000	1440000	1	0.924573	FBgn0043865 FBgn0035218
2L	17380000	17400000	1	0.924407
2R	9712495	9732495	1	0.924292
2R	15712495	15732495	1	0.924253
2L	5340000	5360000	1	0.924243
2L	2160000	2180000	1	0.924128
3L	9286900	9306900	1	0.924028
3L	18186900	18206900	1	0.923979	FBgn0036782 FBgn0266769
3R	27454278	27474278	1	0.92386	FBgn0039518
3R	13754278	13774278	1	0.923775	FBgn0038180 FBgn0038179
2L	2700000	2720000	1	0.923702
3R	13534278	13554278	1	0.923682	FBgn0051337
2L	8560000	8580000	1	0.922359	FBgn0051895
3R	30794278	30814278	1	0.922225	FBgn0039802
2L	1380000	1400000	1	0.922089	FBgn0266203 FBgn0266202
3L	11846900	11866900	1	0.922017	FBgn0040816
2L	2020000	2040000	1	0.921905	FBgn0011860 FBgn0259192 FBgn0259230
2L	9160000	9180000	1	0.921524	FBgn0032100 FBgn0032101
2R	20772495	20792495	1	0.921422	FBgn0263743 FBgn0034548 FBgn0263742 FBgn0263741 FBgn0265877 FBgn0263848 FBgn0263760 FBgn0263850 FBgn0263849
2L	9080000	9100000	1	0.920813	FBgn0032095 FBgn0265675 FBgn0051609
3L	4460000	4480000	1	0.920763	FBgn0052249 FBgn0035550 FBgn0052248 FBgn0052241 FBgn0040699 FBgn0035548
3R	14254278	14274278	1	0.920097	FBgn0267684 FBgn0038217 FBgn0038218 FBgn0262808 FBgn0038219
3L	16426900	16446900	1	0.919889
2R	12412495	12432495	1	0.919774	FBgn0033732 FBgn0033731 FBgn0033733 FBgn0267691 FBgn0262840 FBgn0033736 FBgn0033734 FBgn0033735 FBgn0033737 FBgn0261853
3R	26574278	26594278	1	0.919771
3L	16226900	16246900	1	0.919078	FBgn0263606 FBgn0036579 FBgn0036581 FBgn0263607 FBgn0263608 FBgn0036580
2L	9180000	9200000	1	0.918452
3R	27354278	27374278	1	0.918356	FBgn0263453
2L	18840000	18860000	1	0.91832	FBgn0032720 FBgn0053120 FBgn0032719 FBgn0032721
3R	14094278	14114278	1	0.918234	FBgn0038203 FBgn0038201 FBgn0038204 FBgn0038200 FBgn0038202 FBgn0265168
3R	14034278	14054278	1	0.918199	FBgn0011971 FBgn0038196
3L	7126900	7146900	1	0.917421	FBgn0250836 FBgn0010387 FBgn0023001 FBgn0035742 FBgn0035743
2L	3060000	3080000	1	0.917104
3R	27954278	27974278	1	0.916644	FBgn0039564 FBgn0259990 FBgn0039565 FBgn0051054 FBgn0051253 FBgn0039566 FBgn0051131 FBgn0267108
3R	17774278	17794278	1	0.916461
3R	22154278	22174278	1	0.916267
3L	2300000	2320000	1	0.916222	FBgn0266975 FBgn0266976
2L	16820000	16840000	1	0.915935	FBgn0032613 FBgn0051739 FBgn0032612 FBgn0022213
2L	5900000	5920000	1	0.915921	FBgn0031749 FBgn0264352 FBgn0031747
3R	17834278	17854278	1	0.915818
2L	11420000	11440000	1	0.915578
2R	12392495	12412495	1	0.915534	FBgn0053627 FBgn0053626 FBgn0033727 FBgn0050048 FBgn0033728 FBgn0033730 FBgn0050050 FBgn0033729
3R	20014278	20034278	1	0.915491	FBgn0038763 FBgn0038766 FBgn0038767 FBgn0243511 FBgn0038765
3R	20434278	20454278	1	0.915187
3R	25854278	25874278	1	0.915146	FBgn0039380
3L	6826900	6846900	1	0.914987
2R	16592495	16612495	1	0.914155	FBgn0034143 FBgn0034144
2L	8180000	8200000	1	0.913984	FBgn0083970 FBgn0031995 FBgn0031996 FBgn0264947
2R	23372477	23392477	1	0.913968	FBgn0041712 FBgn0034856 FBgn0266011 FBgn0040660 FBgn0034858 FBgn0050414 FBgn0250838
2L	4740000	4760000	1	0.913906
3R	27494278	27514278	1	0.913764	FBgn0267755 FBgn0039521 FBgn0262613
3L	13326900	13346900	1	0.913274	FBgn0265752 FBgn0040814
2R	8012495	8032495	1	0.912925	FBgn0263572 FBgn0266805 FBgn0263970
2L	5960000	5980000	1	0.91287	FBgn0263442 FBgn0031757 FBgn0031758 FBgn0031756 FBgn0086265
2R	12252495	12272495	1	0.912663	FBgn0264501 FBgn0033705 FBgn0033706
3L	12126900	12146900	1	0.912541	FBgn0011455 FBgn0267552 FBgn0017424 FBgn0002565 FBgn0036255 FBgn0036258 FBgn0036254 FBgn0250825 FBgn0046296 FBgn0036257
3R	26034278	26054278	1	0.912299	FBgn0002633 FBgn0266668 FBgn0000591 FBgn0001139 FBgn0039402
2L	8300000	8320000	1	0.912072	FBgn0032015 FBgn0032016 FBgn0032013 FBgn0261020 FBgn0032014 FBgn0032018 FBgn0262598 FBgn0032017
3R	22134278	22154278	1	0.912039
2L	9800000	9820000	1	0.911995
2R	18752495	18772495	1	0.911805	FBgn0259682 FBgn0050229 FBgn0034387
3R	27534278	27554278	1	0.911604	FBgn0046887 FBgn0046886 FBgn0046885 FBgn0265315 FBgn0265316
3L	12926900	12946900	1	0.911358
2R	12312495	12332495	1	0.911298	FBgn0033713 FBgn0050046 FBgn0033712 FBgn0265375
2L	17400000	17420000	1	0.911064	FBgn0051803 FBgn0032635 FBgn0032634
3R	17374278	17394278	1	0.910937	FBgn0028992 FBgn0262871 FBgn0265043 FBgn0262825 FBgn0038499
3R	30934278	30954278	1	0.910875	FBgn0039810 FBgn0039811
3R	26314278	26334278	1	0.910695	FBgn0261833
2L	2320000	2340000	1	0.910669
2R	17292495	17312495	1	0.910502	FBgn0263709
3L	5666900	5686900	1	0.910444
2L	3200000	3220000	1	0.909481	FBgn0266875
3R	21314278	21334278	1	0.909388	FBgn0263537
2L	1200000	1220000	1	0.909291	FBgn0262944 FBgn0263081 FBgn0040723 FBgn0031324 FBgn0266885
3R	20694278	20714278	1	0.908914
2L	6340000	6360000	1	0.908784	FBgn0031802 FBgn0031803 FBgn0031801 FBgn0031800 FBgn0266003 FBgn0031804
3R	17294278	17314278	1	0.908713
2L	3580000	3600000	1	0.908694	FBgn0264371
3L	4960000	4980000	1	0.908635
3R	25974278	25994278	1	0.90859
2L	11380000	11400000	1	0.908324	FBgn0263764
3R	28254278	28274278	1	0.908313	FBgn0262588 FBgn0262587
3R	15534278	15554278	1	0.908295	FBgn0038348 FBgn0038350 FBgn0038349
2L	6540000	6560000	1	0.908209	FBgn0031830 FBgn0031829 FBgn0266002
3R	20634278	20654278	1	0.907997	FBgn0028422 FBgn0038816 FBgn0051201
2R	19332495	19352495	1	0.907576	FBgn0034435
3L	18066900	18086900	1	0.907375	FBgn0262898 FBgn0264746 FBgn0264747 FBgn0264748 FBgn0266941 FBgn0266940
3R	27774278	27794278	1	0.907363
3L	10346900	10366900	1	0.90733	FBgn0266076
2L	5400000	5420000	1	0.907024	FBgn0016660
2R	12972495	12992495	1	0.906996	FBgn0265427
3L	16046900	16066900	1	0.906885	FBgn0264602
2L	4100000	4120000	1	0.906185
3L	10586900	10606900	1	0.9061	FBgn0267932
3L	14246900	14266900	1	0.905554
3R	18054278	18074278	1	0.905427
3R	12354278	12374278	1	0.90532	FBgn0038018 FBgn0267679 FBgn0065094 FBgn0038017 FBgn0001149 FBgn0038020 FBgn0042206 FBgn0010038 FBgn0010039
3L	10186900	10206900	1	0.905272	FBgn0000451 FBgn0265731
3L	10646900	10666900	1	0.905164	FBgn0052068 FBgn0036096
3R	14954278	14974278	1	0.904953
3R	15974278	15994278	1	0.904836	FBgn0264982
2L	4320000	4340000	1	0.904637	FBgn0028482
3R	18574278	18594278	1	0.904498
2L	15920000	15940000	1	0.904271	FBgn0028514
2R	16732495	16752495	1	0.904215	FBgn0262564 FBgn0053530 FBgn0015584 FBgn0034153 FBgn0034152 FBgn0034151 FBgn0259967 FBgn0265657
2R	20052495	20072495	1	0.904096	FBgn0265842
2L	9120000	9140000	1	0.904029	FBgn0265826 FBgn0265827
3L	4320000	4340000	1	0.903926	FBgn0035532
2L	5980000	6000000	1	0.903818	FBgn0001941 FBgn0001942 FBgn0031759
2L	6560000	6580000	1	0.903803	FBgn0263916 FBgn0031834
3L	14466900	14486900	1	0.903618
3L	11326900	11346900	1	0.903484	FBgn0266785
2L	11640000	11660000	1	0.902887	FBgn0032369 FBgn0262786 FBgn0032371 FBgn0032370
3R	20414278	20434278	1	0.90224
2L	9680000	9700000	1	0.902153	FBgn0000273
2R	12172495	12192495	1	0.902093	FBgn0033693 FBgn0053964 FBgn0033696 FBgn0033697 FBgn0010621 FBgn0033692 FBgn0025454 FBgn0000426 FBgn0033691 FBgn0033690 FBgn0266802
3R	22874278	22894278	1	0.902074
2R	12472495	12492495	1	0.901798	FBgn0085263 FBgn0033744
2L	18800000	18820000	1	0.901673	FBgn0260228 FBgn0040992 FBgn0040993 FBgn0264365 FBgn0264362 FBgn0259201
3R	12334278	12354278	1	0.90152	FBgn0038014 FBgn0038013 FBgn0266261 FBgn0266246
3L	860000	880000	1	0.901257	FBgn0035171
3R	20474278	20494278	1	0.901213	FBgn0265550 FBgn0265551
2L	1580000	1600000	1	0.900848	FBgn0031347
2L	9840000	9860000	1	0.900797	FBgn0264266
2R	15732495	15752495	1	0.900749
3L	11466900	11486900	1	0.900657	FBgn0267716 FBgn0028667 FBgn0028668
3R	24034278	24054278	1	0.900611	FBgn0005649 FBgn0043455 FBgn0039140 FBgn0026576 FBgn0264325 FBgn0039141
3R	12854278	12874278	1	0.900493	FBgn0038088
2L	9340000	9360000	1	0.900085	FBgn0032110 FBgn0263082 FBgn0266037 FBgn0032111
3R	16854278	16874278	1	0.899985	FBgn0262290 FBgn0262462
3R	19414278	19434278	1	0.8998	FBgn0038706
3L	7106900	7126900	1	0.899773	FBgn0002775
3R	12754278	12774278	1	0.899718	FBgn0265163 FBgn0265164
2L	5880000	5900000	1	0.899299	FBgn0002855 FBgn0002856 FBgn0259959 FBgn0265785 FBgn0262814 FBgn0031746 FBgn0265789 FBgn0265788
2R	11212495	11232495	1	0.898965	FBgn0033584 FBgn0037084 FBgn0033582
2L	10120000	10140000	1	0.897373	FBgn0032184
3R	18934278	18954278	1	0.897246
2L	17620000	17640000	1	0.897157	FBgn0265586 FBgn0262356 FBgn0032654
3L	400000	420000	1	0.897088
2L	8980000	9000000	1	0.896797	FBgn0040963 FBgn0040964 FBgn0013746 FBgn0011705 FBgn0015316 FBgn0032085 FBgn0032086
2L	17500000	17520000	1	0.8966
3R	28694278	28714278	1	0.895999
2L	9780000	9800000	1	0.89585	FBgn0042174 FBgn0032150 FBgn0032149 FBgn0032147
3R	14854278	14874278	1	0.895797
3R	24634278	24654278	1	0.895543	FBgn0000139 FBgn0262858 FBgn0039214
3R	17814278	17834278	1	0.895438
3R	27794278	27814278	1	0.895119
2L	8920000	8940000	1	0.894982	FBgn0032075 FBgn0032074 FBgn0267740
2R	18852495	18872495	1	0.894461	FBgn0262569 FBgn0262479 FBgn0034407 FBgn0262481 FBgn0034406 FBgn0010053 FBgn0004240 FBgn0262480 FBgn0034405
2L	22827268	22847268	1	0.894182
2R	13272495	13292495	1	0.893702
3R	16214278	16234278	1	0.892992	FBgn0267201 FBgn0267203
2L	2080000	2100000	1	0.892547	FBgn0266043 FBgn0264864
2L	20160000	20180000	1	0.892392
2L	4020000	4040000	1	0.892335
2L	5180000	5200000	1	0.891335	FBgn0065083 FBgn0082990 FBgn0065107
2L	7740000	7760000	1	0.891296	FBgn0031941 FBgn0031940 FBgn0014454 FBgn0031942 FBgn0267282
2L	12360000	12380000	1	0.891244
2R	14572495	14592495	1	0.891204
3R	13654278	13674278	1	0.891169	FBgn0004587 FBgn0004237 FBgn0010258
2R	8772495	8792495	1	0.890892
2L	11400000	11420000	1	0.890714
2L	6980000	7000000	1	0.89067	FBgn0265414
2L	5760000	5780000	1	0.890613	FBgn0051912 FBgn0031737
2R	17112495	17132495	1	0.890417	FBgn0034197 FBgn0034195 FBgn0034196 FBgn0266810 FBgn0000078 FBgn0266811 FBgn0000079
3L	7766900	7786900	1	0.890408	FBgn0052371
3R	20514278	20534278	1	0.890186
2L	11120000	11140000	1	0.890183	FBgn0040211 FBgn0262647 FBgn0032348 FBgn0028700 FBgn0032346 FBgn0032345
2R	13032495	13052495	1	0.889713	FBgn0033789 FBgn0033788
3R	17274278	17294278	1	0.888895	FBgn0051418 FBgn0263501 FBgn0263500 FBgn0051419
3R	14554278	14574278	1	0.888878	FBgn0038239 FBgn0038238 FBgn0051313 FBgn0038240 FBgn0264904 FBgn0038242 FBgn0004629 FBgn0038243 FBgn0038241
3R	30974278	30994278	1	0.888789	FBgn0267785 FBgn0267786 FBgn0051008 FBgn0051007
2L	12180000	12200000	1	0.888753
3R	18594278	18614278	1	0.888641	FBgn0038630
2L	5460000	5480000	1	0.888563	FBgn0261963
3L	2060000	2080000	1	0.888253
2L	9100000	9120000	1	0.888249	FBgn0032096
2R	13412495	13432495	1	0.888193	FBgn0265272 FBgn0011883 FBgn0011909 FBgn0011881 FBgn0011882 FBgn0011884 FBgn0011885 FBgn0260475
3R	23554278	23574278	1	0.888135	FBgn0039088
2L	10440000	10460000	1	0.887963	FBgn0032253 FBgn0032252 FBgn0266915 FBgn0065110
3L	9126900	9146900	1	0.887698	FBgn0263556 FBgn0035965 FBgn0035964 FBgn0263456
2R	13132495	13152495	1	0.887673	FBgn0259876
2R	20072495	20092495	1	0.887324	FBgn0265843 FBgn0265844
3R	13714278	13734278	1	0.887083	FBgn0267383
3L	18986900	19006900	1	0.88705	FBgn0036838 FBgn0085285 FBgn0036839 FBgn0036837
2R	11232495	11252495	1	0.886928	FBgn0033592 FBgn0033588 FBgn0033589 FBgn0026386 FBgn0262572 FBgn0085256 FBgn0085252 FBgn0033593 FBgn0033591 FBgn0085253 FBgn0033590 FBgn0033587 FBgn0033594 FBgn0085254 FBgn0050029
2R	14872495	14892495	1	0.886588	FBgn0033978 FBgn0033980 FBgn0033979 FBgn0013772 FBgn0033981 FBgn0013771 FBgn0015714
2L	1100000	1120000	1	0.885487	FBgn0031301 FBgn0031302 FBgn0261938
2R	19972495	19992495	1	0.885481	FBgn0034479
3R	12614278	12634278	1	0.885444	FBgn0267681 FBgn0038065 FBgn0260444 FBgn0005671 FBgn0266247
2L	6080000	6100000	1	0.88543	FBgn0266450 FBgn0266445 FBgn0031779
2L	5940000	5960000	1	0.885419	FBgn0040949 FBgn0003980 FBgn0266321 FBgn0086266 FBgn0031753 FBgn0031752 FBgn0001128 FBgn0266826 FBgn0266827 FBgn0261055
2L	12580000	12600000	1	0.884552	FBgn0265807 FBgn0265806
3R	30774278	30794278	1	0.884494	FBgn0262444 FBgn0266699
3R	17154278	17174278	1	0.884268
2L	3080000	3100000	1	0.884063
2R	24352477	24372477	1	0.883653
2L	7520000	7540000	1	0.883351
3R	26814278	26834278	1	0.882992
3L	10726900	10746900	1	0.882815
3R	29934278	29954278	1	0.882041	FBgn0039726 FBgn0039727
3R	26834278	26854278	1	0.881589	FBgn0267742
2L	7040000	7060000	1	0.881414
3L	11566900	11586900	1	0.881296	FBgn0053269 FBgn0053490 FBgn0263247 FBgn0053270 FBgn0263248 FBgn0053271 FBgn0053489 FBgn0052086
3L	2120000	2140000	1	0.881114
3R	31274278	31294278	1	0.881069
2L	5260000	5280000	1	0.880629	FBgn0031693 FBgn0031694 FBgn0031695 FBgn0000228
2L	1900000	1920000	1	0.880193
3L	2860000	2880000	1	0.88016
3L	10706900	10726900	1	0.880024
3R	24574278	24594278	1	0.879691	FBgn0039210
3L	15786900	15806900	1	0.879388
3R	24914278	24934278	1	0.879283	FBgn0039250 FBgn0051382 FBgn0051416 FBgn0265189 FBgn0267766 FBgn0039249 FBgn0039251
3L	2220000	2240000	1	0.879037	FBgn0035317 FBgn0035318
2R	20032495	20052495	1	0.878649
2L	12280000	12300000	1	0.878214
2L	1740000	1760000	1	0.877711	FBgn0041249 FBgn0031365 FBgn0027597 FBgn0031364
2L	12380000	12400000	1	0.877183
2L	6280000	6300000	1	0.877076
2L	1400000	1420000	1	0.876715
2L	1460000	1480000	1	0.87656
3L	12906900	12926900	1	0.876062	FBgn0052115
3R	30574278	30594278	1	0.875796	FBgn0039787 FBgn0039788 FBgn0039789
3L	18966900	18986900	1	0.875487	FBgn0036835 FBgn0267249
3R	19494278	19514278	1	0.875056
2L	4780000	4800000	1	0.874305	FBgn0031628
3R	14714278	14734278	1	0.873957	FBgn0038256
2R	15472495	15492495	1	0.873891
2L	19080000	19100000	1	0.87376
2R	22952477	22972477	1	0.873514	FBgn0266007
3R	15814278	15834278	1	0.873317	FBgn0263023 FBgn0003227 FBgn0038366
2R	16872495	16892495	1	0.873093	FBgn0046999 FBgn0034165 FBgn0034166
2L	5480000	5500000	1	0.873033	FBgn0266825
3L	5746900	5766900	1	0.872603	FBgn0065058 FBgn0083044 FBgn0082994 FBgn0082995 FBgn0263488 FBgn0016756 FBgn0086660 FBgn0263106 FBgn0035630
3R	10954278	10974278	1	0.869929	FBgn0267121
3L	13286900	13306900	1	0.869827	FBgn0003034 FBgn0265748 FBgn0265750 FBgn0262623 FBgn0259971 FBgn0264513 FBgn0264512 FBgn0259970 FBgn0266788 FBgn0266789 FBgn0266790
3R	22854278	22874278	1	0.869804
2R	16172495	16192495	1	0.869701	FBgn0015754 FBgn0034086
3L	5426900	5446900	1	0.869523
3R	19554278	19574278	1	0.869267
3L	11546900	11566900	1	0.868938	FBgn0263569 FBgn0036173
2L	13920000	13940000	1	0.868771	FBgn0261628 FBgn0032538 FBgn0028938
3L	17206900	17226900	1	0.868318
2R	17032495	17052495	1	0.868133	FBgn0034182 FBgn0034183 FBgn0263114 FBgn0266637 FBgn0266638
2L	5600000	5620000	1	0.867993	FBgn0266030 FBgn0031725
3R	29374278	29394278	1	0.867871
2R	18712495	18732495	1	0.867655	FBgn0263522 FBgn0034381
2R	12992495	13012495	1	0.867307	FBgn0053798 FBgn0265623
3R	13734278	13754278	1	0.867143
3R	27114278	27134278	1	0.866841	FBgn0039490 FBgn0039491 FBgn0039489 FBgn0039488
2L	1240000	1260000	1	0.866794	FBgn0031327
3R	13834278	13854278	1	0.866697	FBgn0051495
3R	9134278	9154278	1	0.866588
2L	7940000	7960000	1	0.866438
2L	3880000	3900000	1	0.866074
3R	30054278	30074278	1	0.866064	FBgn0260468 FBgn0039744 FBgn0085346 FBgn0003479
3R	30474278	30494278	1	0.865833	FBgn0260440 FBgn0039778 FBgn0039779 FBgn0039777
3R	25774278	25794278	1	0.865723	FBgn0039370 FBgn0051093 FBgn0039369 FBgn0263623 FBgn0263622 FBgn0039371 FBgn0039368 FBgn0051380
2R	12492495	12512495	1	0.865452	FBgn0050044 FBgn0033748
3L	18646900	18666900	1	0.864349
2L	5500000	5520000	1	0.864313	FBgn0031708 FBgn0031707
3L	2840000	2860000	1	0.864259
3R	14114278	14134278	1	0.864176	FBgn0020510 FBgn0262955 FBgn0038207 FBgn0038206 FBgn0010340
2L	10400000	10420000	1	0.863976	FBgn0003942 FBgn0025366 FBgn0032243 FBgn0032242 FBgn0067622 FBgn0032240 FBgn0051718
2L	6300000	6320000	1	0.862923	FBgn0260452 FBgn0264543
3R	17914278	17934278	1	0.862595
2L	1420000	1440000	1	0.862416	FBgn0003926 FBgn0263320
3L	7086900	7106900	1	0.862404	FBgn0035737 FBgn0035736
2R	14392495	14412495	1	0.86225	FBgn0265500 FBgn0033934
3R	14614278	14634278	1	0.862018	FBgn0013981 FBgn0003169
3R	13474278	13494278	1	0.861821	FBgn0267149
3R	14074278	14094278	1	0.861475	FBgn0038198
3L	9546900	9566900	1	0.860779
2L	11820000	11840000	1	0.860235	FBgn0259963 FBgn0264565 FBgn0000588 FBgn0266363 FBgn0266364 FBgn0266365 FBgn0266366 FBgn0265349
3L	8466900	8486900	1	0.859892
2L	8080000	8100000	1	0.859845	FBgn0266795
3R	27394278	27414278	1	0.859284	FBgn0267653
2R	21792495	21812495	1	0.859225	FBgn0085233 FBgn0034661 FBgn0042098 FBgn0046297
2R	11632495	11652495	1	0.85864	FBgn0050254 FBgn0085257 FBgn0033639
2R	20672495	20692495	1	0.858569	FBgn0041240 FBgn0265870
2R	14592495	14612495	1	0.858562	FBgn0019938 FBgn0050077 FBgn0003742 FBgn0053468 FBgn0053469 FBgn0033945 FBgn0263487
3R	13854278	13874278	1	0.858394	FBgn0267959 FBgn0038186
2L	2820000	2840000	1	0.858366	FBgn0031467 FBgn0031465 FBgn0031466
2L	3440000	3460000	1	0.85779	FBgn0031535 FBgn0031533 FBgn0031534 FBgn0031536
3R	20354278	20374278	1	0.857566	FBgn0266381 FBgn0038790
3L	14406900	14426900	1	0.857527	FBgn0267695 FBgn0267696 FBgn0036423 FBgn0266768
3R	10714278	10734278	1	0.857258	FBgn0037827
2R	12712495	12732495	1	0.857202
2L	11360000	11380000	1	0.856988
2R	18052495	18072495	1	0.856739	FBgn0034296 FBgn0034295 FBgn0266852 FBgn0266853
2L	16480000	16500000	1	0.856688	FBgn0266329 FBgn0032585
2L	9860000	9880000	1	0.856684
3R	17694278	17714278	1	0.856499	FBgn0267703 FBgn0267702
2R	12192495	12212495	1	0.856427	FBgn0083988 FBgn0083989 FBgn0020377 FBgn0033699 FBgn0266814
2R	10932495	10952495	1	0.856256	FBgn0266763 FBgn0033574
3R	22374278	22394278	1	0.855506	FBgn0263047 FBgn0038958 FBgn0083985 FBgn0263048 FBgn0038953 FBgn0038957 FBgn0038956
3L	16486900	16506900	1	0.855493	FBgn0260388 FBgn0003515
2L	7060000	7080000	1	0.854831	FBgn0266666 FBgn0031887 FBgn0265822 FBgn0031886
3L	15486900	15506900	1	0.854771	FBgn0026738 FBgn0040805 FBgn0036499 FBgn0036498 FBgn0036500 FBgn0036501
2R	19352495	19372495	1	0.85474	FBgn0034437 FBgn0034436
3R	8454278	8474278	1	0.85441	FBgn0267800
2R	20092495	20112495	1	0.854381
3L	17946900	17966900	1	0.85421	FBgn0266942
2R	18252495	18272495	1	0.854167	FBgn0265594
3R	15154278	15174278	1	0.854153
3L	6486900	6506900	1	0.854119	FBgn0267641 FBgn0035704 FBgn0035703
2L	1480000	1500000	1	0.854044	FBgn0051926 FBgn0051928 FBgn0053128 FBgn0051661
3R	28074278	28094278	1	0.853958
3L	14606900	14626900	1	0.853499	FBgn0003388
2L	17680000	17700000	1	0.853005
2L	16340000	16360000	1	0.852993	FBgn0028506 FBgn0265578 FBgn0087041 FBgn0000307 FBgn0025678
2R	13312495	13332495	1	0.852348	FBgn0262391
3R	17474278	17494278	1	0.852014
3L	18686900	18706900	1	0.851633	FBgn0036807 FBgn0036808 FBgn0264719
2L	2000000	2020000	1	0.851484	FBgn0051669 FBgn0051939 FBgn0051943 FBgn0051940 FBgn0051944 FBgn0040718 FBgn0263441 FBgn0267276 FBgn0040717
3R	18014278	18034278	1	0.851239	FBgn0038565 FBgn0038564 FBgn0000477
2R	15132495	15152495	1	0.850994	FBgn0033994 FBgn0262954 FBgn0033993
2R	23912477	23932477	1	0.850283	FBgn0034931
3R	12894278	12914278	1	0.849813	FBgn0038090
3L	16506900	16526900	1	0.849696
2L	9820000	9840000	1	0.849691
2R	13112495	13132495	1	0.849659	FBgn0033794 FBgn0033793
3L	18166900	18186900	1	0.848794	FBgn0003997
2R	18952495	18972495	1	0.848596	FBgn0014269
3R	12294278	12314278	1	0.84855	FBgn0038011
3R	24554278	24574278	1	0.848073	FBgn0004189 FBgn0004190 FBgn0004188 FBgn0011845
3R	25134278	25154278	1	0.847946	FBgn0267767 FBgn0039283
3R	19294278	19314278	1	0.847929	FBgn0265063
2L	11920000	11940000	1	0.84759	FBgn0026392 FBgn0026390 FBgn0026391
3L	3820000	3840000	1	0.847564	FBgn0064227
3L	23666900	23686900	1	0.847278
3R	13974278	13994278	1	0.847111
2L	12400000	12420000	1	0.847079
3L	17186900	17206900	1	0.846711
2R	10372495	10392495	1	0.846628	FBgn0265141 FBgn0033515
2L	5800000	5820000	1	0.846482	FBgn0265786 FBgn0265787 FBgn0051644 FBgn0031741 FBgn0262999 FBgn0031740 FBgn0031739
2L	5420000	5440000	1	0.846031	FBgn0086033 FBgn0263866 FBgn0263867 FBgn0263868 FBgn0051647
2L	13620000	13640000	1	0.845998	FBgn0263329
3L	15846900	15866900	1	0.845673
2R	16712495	16732495	1	0.845008
2L	10460000	10480000	1	0.845	FBgn0051719
3R	17954278	17974278	1	0.844888
2L	7200000	7220000	1	0.844747
3L	15346900	15366900	1	0.844603
2L	5360000	5380000	1	0.844474
2R	15932495	15952495	1	0.844131	FBgn0263576 FBgn0034052 FBgn0050093 FBgn0034050 FBgn0034053 FBgn0034051
3R	20034278	20054278	1	0.843829	FBgn0260466 FBgn0064119
2R	16672495	16692495	1	0.843692
2R	16412495	16432495	1	0.843683	FBgn0029154 FBgn0029153
2L	6740000	6760000	1	0.84349	FBgn0031856 FBgn0086034 FBgn0031855 FBgn0265257 FBgn0051910
3R	12694278	12714278	1	0.843122	FBgn0038079 FBgn0002905 FBgn0016693 FBgn0038080
2R	11732495	11752495	1	0.843096
2L	10320000	10340000	1	0.842884	FBgn0032221 FBgn0032222 FBgn0011703 FBgn0032219 FBgn0032223
3R	20674278	20694278	1	0.84267	FBgn0263406 FBgn0266382 FBgn0038820
2L	5140000	5160000	1	0.842367
3L	10606900	10626900	1	0.842323	FBgn0260396 FBgn0262592
3R	19974278	19994278	1	0.842316
3L	10766900	10786900	1	0.842105	FBgn0265737 FBgn0262890
3L	7886900	7906900	1	0.841487	FBgn0035823
3L	7506900	7526900	1	0.841001	FBgn0267556 FBgn0035793
3R	20734278	20754278	1	0.84095	FBgn0262185 FBgn0051199 FBgn0004107 FBgn0051200 FBgn0261857 FBgn0038821 FBgn0265606
3R	12674278	12694278	1	0.839984	FBgn0038074 FBgn0263621 FBgn0011745 FBgn0001296 FBgn0038076 FBgn0051347 FBgn0005355 FBgn0026207
2L	5380000	5400000	1	0.839251	FBgn0265958
3R	27574278	27594278	1	0.838368	FBgn0040080
2R	16032495	16052495	1	0.838219
3L	1880000	1900000	1	0.836794	FBgn0262624 FBgn0000109
2L	18700000	18720000	1	0.836632	FBgn0032704 FBgn0032703 FBgn0032705 FBgn0032706 FBgn0025608 FBgn0032702
2R	20752495	20772495	1	0.83557	FBgn0085231 FBgn0265876
3R	26114278	26134278	1	0.835368	FBgn0267729 FBgn0039413
2L	5440000	5460000	1	0.83536
3R	14394278	14414278	1	0.835215	FBgn0262327
3L	10746900	10766900	1	0.835093
2R	13472495	13492495	1	0.834975	FBgn0262821 FBgn0040477 FBgn0033842
3L	14366900	14386900	1	0.834492	FBgn0262580 FBgn0036421
2R	23512477	23532477	1	0.834158	FBgn0261786 FBgn0015372
2R	15452495	15472495	1	0.83406
3R	27254278	27274278	1	0.833584	FBgn0264841 FBgn0039504 FBgn0002441 FBgn0039503 FBgn0010328
3L	10826900	10846900	1	0.833566
3L	17146900	17166900	1	0.833506
3R	11194278	11214278	1	0.8333	FBgn0261808 FBgn0037874 FBgn0037870 FBgn0037873
2L	17460000	17480000	1	0.8332	FBgn0027885 FBgn0032640
2L	10380000	10400000	1	0.832954	FBgn0267821 FBgn0004106 FBgn0267439 FBgn0032234 FBgn0032235 FBgn0032236 FBgn0262782
2L	10500000	10520000	1	0.832935	FBgn0267828 FBgn0010398 FBgn0265155 FBgn0032261 FBgn0032262
2L	1760000	1780000	1	0.832823
3R	19454278	19474278	1	0.832679	FBgn0038708
3R	28734278	28754278	1	0.832442	FBgn0039595 FBgn0039596
3L	15466900	15486900	1	0.832417	FBgn0036496 FBgn0036497
3R	17114278	17134278	1	0.832392	FBgn0266454 FBgn0038479 FBgn0051269 FBgn0051265 FBgn0038481 FBgn0051266 FBgn0038482 FBgn0085307 FBgn0265169 FBgn0261847
3L	16886900	16906900	1	0.83152
3R	12714278	12734278	1	0.831246	FBgn0265162
2L	10800000	10820000	1	0.831162	FBgn0265792
2R	13572495	13592495	1	0.830753	FBgn0265497 FBgn0265496 FBgn0261990
3L	9466900	9486900	1	0.830695	FBgn0011327 FBgn0036004
2L	7260000	7280000	1	0.830524
3L	10406900	10426900	1	0.8302	FBgn0265736 FBgn0036082 FBgn0264722
3L	5266900	5286900	1	0.829441
3R	19754278	19774278	1	0.82918	FBgn0038730
3R	23674278	23694278	1	0.828915	FBgn0040227 FBgn0039099 FBgn0039098 FBgn0042106 FBgn0039101 FBgn0039102
2L	17760000	17780000	1	0.82881
2L	13900000	13920000	1	0.828063	FBgn0012037 FBgn0032535 FBgn0025115
2R	19172495	19192495	1	0.828007
3L	4920000	4940000	1	0.827909	FBgn0263618
2L	16440000	16460000	1	0.827151	FBgn0020414 FBgn0020416 FBgn0020415
3R	16034278	16054278	1	0.826709	FBgn0038394 FBgn0038396 FBgn0024222 FBgn0038395 FBgn0266739
2L	12340000	12360000	1	0.826401	FBgn0032424 FBgn0264361
2R	19912495	19932495	1	0.826315	FBgn0265837
2R	13592495	13612495	1	0.826026	FBgn0033859 FBgn0262360 FBgn0033861 FBgn0033860 FBgn0085265
3R	30814278	30834278	1	0.825834
3R	18474278	18494278	1	0.825478
3L	8766900	8786900	1	0.825198
3L	5586900	5606900	1	0.825004	FBgn0035619 FBgn0035622 FBgn0035621 FBgn0003486 FBgn0035620
2L	16380000	16400000	1	0.824674
2R	14892495	14912495	1	0.824168	FBgn0033982
3R	11114278	11134278	1	0.824074	FBgn0037860 FBgn0040256
2R	16192495	16212495	1	0.823997	FBgn0050237 FBgn0262166 FBgn0265177 FBgn0265178 FBgn0262026 FBgn0015295
2L	4480000	4500000	1	0.823771
3R	19674278	19694278	1	0.823121
2L	11900000	11920000	1	0.823112
2R	21612495	21632495	1	0.82308	FBgn0034641 FBgn0016641 FBgn0000326 FBgn0042180
3L	3580000	3600000	1	0.822871	FBgn0053504
3R	27694278	27714278	1	0.8227	FBgn0263597 FBgn0263025 FBgn0263024 FBgn0045862 FBgn0039544 FBgn0039543 FBgn0086346
3R	17734278	17754278	1	0.821239	FBgn0038541
2R	20652495	20672495	1	0.82092	FBgn0034539 FBgn0050155 FBgn0050211 FBgn0034541 FBgn0000615 FBgn0034542 FBgn0034538
3R	16974278	16994278	1	0.820686	FBgn0038458 FBgn0015008 FBgn0043069 FBgn0038461 FBgn0038460 FBgn0015011 FBgn0266740 FBgn0266748 FBgn0267152
3R	28954278	28974278	1	0.819881	FBgn0267229
3R	23534278	23554278	1	0.819345	FBgn0039086 FBgn0039087
3R	13574278	13594278	1	0.819071	FBgn0038158 FBgn0264430 FBgn0038159
3R	9894278	9914278	1	0.818804
2R	14452495	14472495	1	0.818714
2L	7920000	7940000	1	0.818431
3R	18294278	18314278	1	0.818277	FBgn0038602 FBgn0024432 FBgn0038601
2L	17660000	17680000	1	0.817584
2R	10812495	10832495	1	0.817524	FBgn0086898 FBgn0029134 FBgn0033555 FBgn0033556 FBgn0033554 FBgn0033557 FBgn0033551
3L	10246900	10266900	1	0.817481	FBgn0265733
3R	19934278	19954278	1	0.817335	FBgn0267709 FBgn0038756
2L	10520000	10540000	1	0.817023	FBgn0032264 FBgn0032265 FBgn0032266
2R	13792495	13812495	1	0.816782	FBgn0033869
3L	7806900	7826900	1	0.81669
3L	17246900	17266900	1	0.816548	FBgn0264466 FBgn0036705 FBgn0036704
2L	8200000	8220000	1	0.815917	FBgn0264950 FBgn0031998 FBgn0032003 FBgn0015299 FBgn0032004 FBgn0031999 FBgn0264952 FBgn0264951 FBgn0032001 FBgn0032002 FBgn0032000 FBgn0003607
3L	9706900	9726900	1	0.815122	FBgn0036036 FBgn0065081 FBgn0045823 FBgn0036038 FBgn0261530 FBgn0040475 FBgn0036035
3L	11166900	11186900	1	0.814871	FBgn0036143 FBgn0036142
3R	21574278	21594278	1	0.814716
3L	5466900	5486900	1	0.814197	FBgn0035607
3L	7686900	7706900	1	0.813876
2L	14500000	14520000	1	0.813809	FBgn0011862 FBgn0011863 FBgn0011864 FBgn0267257
3L	10626900	10646900	1	0.81353	FBgn0036089 FBgn0000629 FBgn0260643 FBgn0260644 FBgn0001179 FBgn0054001 FBgn0036093 FBgn0036090 FBgn0036091 FBgn0036094
2R	15952495	15972495	1	0.812852	FBgn0034054
2R	11952495	11972495	1	0.812812	FBgn0033669
3R	29034278	29054278	1	0.812731	FBgn0039629 FBgn0039628 FBgn0027873 FBgn0003093 FBgn0039626 FBgn0039627
2L	7840000	7860000	1	0.812676	FBgn0031954 FBgn0031955
2L	6500000	6520000	1	0.812281	FBgn0266001
3R	23574278	23594278	1	0.811844	FBgn0053337 FBgn0039091
3L	10306900	10326900	1	0.811782	FBgn0262381
2R	20852495	20872495	1	0.810947	FBgn0067905 FBgn0034554 FBgn0040653
3R	13334278	13354278	1	0.810853	FBgn0038140
2L	17800000	17820000	1	0.810576	FBgn0262017
3L	11426900	11446900	1	0.810232	FBgn0265741 FBgn0265742 FBgn0036159 FBgn0036158
3L	1920000	1940000	1	0.810167	FBgn0052312 FBgn0267476 FBgn0261723 FBgn0035293
2R	18472495	18492495	1	0.809992
3L	2500000	2520000	1	0.809701	FBgn0266680 FBgn0266974
3L	15626900	15646900	1	0.809668	FBgn0267639
3R	23474278	23494278	1	0.809492	FBgn0051225 FBgn0039079 FBgn0039080 FBgn0265383
3R	24294278	24314278	1	0.807482
3R	28654278	28674278	1	0.806476	FBgn0039593 FBgn0053346
3R	25254278	25274278	1	0.806171	FBgn0039309 FBgn0266741 FBgn0039306 FBgn0039307 FBgn0267768 FBgn0039308 FBgn0039303 FBgn0039305 FBgn0027090 FBgn0039304 FBgn0263002
3R	31334278	31354278	1	0.806136	FBgn0267787
2L	11000000	11020000	1	0.805902	FBgn0267425 FBgn0040096 FBgn0021761 FBgn0032329 FBgn0015756 FBgn0250837 FBgn0023415 FBgn0032331
3L	12886900	12906900	1	0.805569	FBgn0036324 FBgn0264486 FBgn0052117 FBgn0036323 FBgn0267312
2R	12352495	12372495	1	0.805542	FBgn0053013 FBgn0050049 FBgn0050043 FBgn0053012
2R	15692495	15712495	1	0.805489	FBgn0053462 FBgn0261538 FBgn0050080 FBgn0053460 FBgn0053461
3L	14166900	14186900	1	0.805417	FBgn0000411
3R	19374278	19394278	1	0.805359	FBgn0051245 FBgn0051404 FBgn0085314 FBgn0038701 FBgn0038700
2L	11320000	11340000	1	0.804837	FBgn0265796 FBgn0265795
3R	12314278	12334278	1	0.804661	FBgn0051432 FBgn0038012 FBgn0267144 FBgn0267143
2L	9740000	9760000	1	0.804611	FBgn0015035
3L	1900000	1920000	1	0.804572
3R	18794278	18814278	1	0.804328
2L	4300000	4320000	1	0.804233
3R	30154278	30174278	1	0.803874	FBgn0051028 FBgn0051030
3L	4420000	4440000	1	0.803547	FBgn0000038 FBgn0035543 FBgn0035544
3R	30954278	30974278	1	0.803525	FBgn0039812 FBgn0062411
3L	19026900	19046900	1	0.803365	FBgn0267602
3L	10026900	10046900	1	0.803317	FBgn0266648
3R	24534278	24554278	1	0.803276	FBgn0039207
2R	21132495	21152495	1	0.803158	FBgn0034592 FBgn0034595 FBgn0026582 FBgn0021872
2R	10412495	10432495	1	0.80313	FBgn0033520 FBgn0033518 FBgn0033519 FBgn0053474 FBgn0033521
3L	11506900	11526900	1	0.802931	FBgn0053500 FBgn0053272 FBgn0003378 FBgn0003377 FBgn0036169 FBgn0036170 FBgn0036168 FBgn0003373
2L	5280000	5300000	1	0.802159	FBgn0267294 FBgn0265955 FBgn0265956
3R	19334278	19354278	1	0.801956
3L	10326900	10346900	1	0.8016
3R	17014278	17034278	1	0.801596	FBgn0004577 FBgn0038468 FBgn0051268 FBgn0038467
2L	11180000	11200000	1	0.801371
3R	29414278	29434278	1	0.801365
3R	18534278	18554278	1	0.80089
2L	9720000	9740000	1	0.800603	FBgn0032140 FBgn0032139
2R	23132477	23152477	1	0.800163	FBgn0050192 FBgn0034827 FBgn0034826
3R	30094278	30114278	1	0.799911	FBgn0267781
3R	13074278	13094278	1	0.799757	FBgn0266302 FBgn0085337 FBgn0262365
3R	27414278	27434278	1	0.799343
2L	12000000	12020000	1	0.798969	FBgn0032394 FBgn0014019 FBgn0265799
3R	15494278	15514278	1	0.798879	FBgn0264775 FBgn0264776 FBgn0038345
3L	14446900	14466900	1	0.798535
3L	18106900	18126900	1	0.798168	FBgn0262100 FBgn0002901 FBgn0052195 FBgn0036777 FBgn0036775
3L	16446900	16466900	1	0.798105
2L	12240000	12260000	1	0.797747
2L	740000	760000	1	0.797293
3R	10194278	10214278	1	0.796982	FBgn0025879
2L	18600000	18620000	1	0.796922	FBgn0032690 FBgn0032692 FBgn0032691 FBgn0051789
3R	13614278	13634278	1	0.796421	FBgn0038161 FBgn0267240 FBgn0267154
3R	28574278	28594278	1	0.796408	FBgn0262741 FBgn0000659
3R	30454278	30474278	1	0.796197	FBgn0039774 FBgn0039773
2R	17472495	17492495	1	0.796103	FBgn0034225 FBgn0262570 FBgn0034224
3R	12734278	12754278	1	0.795992	FBgn0038083 FBgn0267958 FBgn0038082
3R	26734278	26754278	1	0.795371	FBgn0039453 FBgn0039454
3R	9114278	9134278	1	0.79525
2L	4360000	4380000	1	0.794904	FBgn0266903
3L	8866900	8886900	1	0.794438
2R	13652495	13672495	1	0.794328	FBgn0033862 FBgn0033864 FBgn0033863 FBgn0266391
3L	5206900	5226900	1	0.794226
2R	18692495	18712495	1	0.794193	FBgn0034380 FBgn0034377 FBgn0034379 FBgn0062961
3R	24714278	24734278	1	0.794033	FBgn0039219 FBgn0086059 FBgn0039218
3L	1160000	1180000	1	0.793531
2R	21312495	21332495	1	0.793082	FBgn0082971 FBgn0082972 FBgn0082963 FBgn0082970 FBgn0083018 FBgn0082969 FBgn0083017 FBgn0082968 FBgn0083016 FBgn0086669 FBgn0086023 FBgn0086024 FBgn0086025 FBgn0050394 FBgn0250824
3L	4800000	4820000	1	0.792242	FBgn0035575 FBgn0265721 FBgn0042131
3L	12426900	12446900	1	0.792228
2R	18792495	18812495	1	0.792095	FBgn0010651 FBgn0265661 FBgn0034392
3R	18494278	18514278	1	0.791387
3L	2980000	3000000	1	0.791182	FBgn0035383 FBgn0035384
3R	13954278	13974278	1	0.791147	FBgn0016672 FBgn0038191 FBgn0015270
3L	5926900	5946900	1	0.791006	FBgn0002638
2R	18812495	18832495	1	0.790993	FBgn0267954 FBgn0010551 FBgn0034396 FBgn0263337
3R	18314278	18334278	1	0.790476	FBgn0051235
2L	3300000	3320000	1	0.790465	FBgn0031517 FBgn0031518 FBgn0031519
2L	3140000	3160000	1	0.790404	FBgn0031505 FBgn0011648
2R	20512495	20532495	1	0.790353	FBgn0034511 FBgn0265861 FBgn0050151 FBgn0034510
2L	17640000	17660000	1	0.790334	FBgn0267263
3L	18146900	18166900	1	0.789631	FBgn0036781 FBgn0036780
3R	30834278	30854278	1	0.789347
3R	30694278	30714278	1	0.788371	FBgn0267654 FBgn0267784 FBgn0051010 FBgn0000274
3L	17606900	17626900	1	0.788073	FBgn0036740
2L	5660000	5680000	1	0.787997	FBgn0031729 FBgn0031728 FBgn0266068
3L	18906900	18926900	1	0.787372	FBgn0036830 FBgn0036831 FBgn0036829 FBgn0262351 FBgn0036833 FBgn0036832
3R	18454278	18474278	1	0.787249
2L	12680000	12700000	1	0.786804	FBgn0032448 FBgn0032444 FBgn0032445 FBgn0032447 FBgn0032446
2R	20792495	20812495	1	0.786767	FBgn0034551
2R	19012495	19032495	1	0.786625	FBgn0263083
3L	5646900	5666900	1	0.785474	FBgn0035626 FBgn0035627
3R	26774278	26794278	1	0.785426	FBgn0261861 FBgn0261860
3L	5306900	5326900	1	0.785421	FBgn0267305
3L	7206900	7226900	1	0.784783	FBgn0266959
3R	19194278	19214278	1	0.78472
3R	14574278	14594278	1	0.784496	FBgn0264903
2R	17132495	17152495	1	0.784436	FBgn0065047 FBgn0050234 FBgn0050235 FBgn0065048 FBgn0034199 FBgn0034200 FBgn0083936 FBgn0034198 FBgn0265541 FBgn0265536 FBgn0262567 FBgn0262563
2R	8392495	8412495	1	0.78421	FBgn0033289
2L	2620000	2640000	1	0.784187	FBgn0263322 FBgn0267269
3L	10866900	10886900	1	0.782868	FBgn0036105 FBgn0027615 FBgn0036107 FBgn0036104 FBgn0036106
3L	4820000	4840000	1	0.782845	FBgn0035577 FBgn0027085
2R	18992495	19012495	1	0.782566	FBgn0263473
3L	2900000	2920000	1	0.78256	FBgn0035380
2L	4220000	4240000	1	0.782118	FBgn0031590 FBgn0265819 FBgn0003941
3R	15834278	15854278	1	0.782016	FBgn0263525 FBgn0017567 FBgn0038371 FBgn0003483 FBgn0038373 FBgn0265048 FBgn0038369
3L	13346900	13366900	1	0.781209	FBgn0036348 FBgn0040813
3R	14514278	14534278	1	0.780798	FBgn0267685 FBgn0267686 FBgn0085302 FBgn0038236
2R	21672495	21692495	1	0.780589	FBgn0050263 FBgn0003687 FBgn0034654 FBgn0260223 FBgn0027360 FBgn0050285 FBgn0034655
3R	23494278	23514278	1	0.780537	FBgn0085318
3R	22814278	22834278	1	0.780251	FBgn0265450 FBgn0039028
3R	20614278	20634278	1	0.78003	FBgn0038815 FBgn0001169
3R	16274278	16294278	1	0.77931
3R	23394278	23414278	1	0.778977	FBgn0039077 FBgn0259194 FBgn0259193 FBgn0265382
2R	21592495	21612495	1	0.778885	FBgn0262888 FBgn0034638 FBgn0266643
3R	12274278	12294278	1	0.778878	FBgn0267678
2L	3860000	3880000	1	0.778379	FBgn0051957 FBgn0264887 FBgn0031574 FBgn0031575
2L	18560000	18580000	1	0.778079
3R	14494278	14514278	1	0.777992	FBgn0265066 FBgn0038234 FBgn0038233 FBgn0038235
2R	11712495	11732495	1	0.777887
3L	8026900	8046900	1	0.777766	FBgn0052370
2R	19932495	19952495	1	0.777653	FBgn0261581 FBgn0262824 FBgn0261580 FBgn0265838 FBgn0034478 FBgn0050447 FBgn0263340
3L	4080000	4100000	1	0.777159	FBgn0035495 FBgn0035496
3R	15014278	15034278	1	0.777076	FBgn0038280
3R	14374278	14394278	1	0.775957	FBgn0038225 FBgn0266248
2L	2240000	2260000	1	0.775908	FBgn0031406 FBgn0262106 FBgn0042187 FBgn0264979 FBgn0042186 FBgn0266023 FBgn0266022 FBgn0011832
3L	4620000	4640000	1	0.775859	FBgn0035563 FBgn0052246 FBgn0015805 FBgn0266987
3R	25614278	25634278	1	0.77576	FBgn0039347 FBgn0039349
3R	19314278	19334278	1	0.775694	FBgn0262262 FBgn0265064 FBgn0262903
2L	12080000	12100000	1	0.775601	FBgn0003145 FBgn0265805 FBgn0032408 FBgn0265801 FBgn0265803 FBgn0265804 FBgn0032407 FBgn0028707
3L	5986900	6006900	1	0.775547
3R	19714278	19734278	1	0.775455	FBgn0085315
2L	4900000	4920000	1	0.775105	FBgn0031646
2R	21012495	21032495	1	0.77448	FBgn0034576 FBgn0034573 FBgn0050296 FBgn0266641
3L	10506900	10526900	1	0.774435
2L	1340000	1360000	1	0.774334	FBgn0031333 FBgn0053922 FBgn0053923 FBgn0051924 FBgn0266358 FBgn0266357 FBgn0031335 FBgn0026141 FBgn0031332 FBgn0051659
3R	26714278	26734278	1	0.774221	FBgn0039450 FBgn0040608 FBgn0039452 FBgn0039451 FBgn0039449 FBgn0040607
2L	7800000	7820000	1	0.774156	FBgn0031952 FBgn0031951
3R	10634278	10654278	1	0.774032	FBgn0264788
3L	1320000	1340000	1	0.77365	FBgn0011361 FBgn0035209 FBgn0010786 FBgn0035211 FBgn0035210 FBgn0035208 FBgn0266676
2L	9280000	9300000	1	0.773624
2L	10920000	10940000	1	0.773351	FBgn0032318
2L	1160000	1180000	1	0.773168	FBgn0031314 FBgn0031315 FBgn0031318 FBgn0031317 FBgn0031313 FBgn0051922 FBgn0024314
2R	14752495	14772495	1	0.773055	FBgn0033960 FBgn0259112 FBgn0033961 FBgn0050476 FBgn0020767 FBgn0266723 FBgn0033963
3L	6866900	6886900	1	0.772987	FBgn0266965
2L	6320000	6340000	1	0.772949	FBgn0265778 FBgn0031799
3R	29574278	29594278	1	0.772801	FBgn0039671 FBgn0039670 FBgn0051041
3L	7066900	7086900	1	0.772572	FBgn0054030 FBgn0035735 FBgn0052391
2L	14960000	14980000	1	0.772372	FBgn0266870
3R	21194278	21214278	1	0.772101
3R	25634278	25654278	1	0.772045	FBgn0262388 FBgn0262411 FBgn0267577 FBgn0039350
2L	11060000	11080000	1	0.771765	FBgn0275432 FBgn0032335 FBgn0263971 FBgn0267289
2L	4380000	4400000	1	0.771756	FBgn0027560 FBgn0031600 FBgn0261976 FBgn0031598 FBgn0031597
2L	13160000	13180000	1	0.771062	FBgn0032473 FBgn0267989 FBgn0032475 FBgn0024291 FBgn0032474 FBgn0264546 FBgn0032476
3R	26674278	26694278	1	0.770909	FBgn0039448
3L	14126900	14146900	1	0.770799	FBgn0267547
2L	7120000	7140000	1	0.770566
3L	16306900	16326900	1	0.770077	FBgn0036603 FBgn0042201 FBgn0036607 FBgn0036608 FBgn0261635 FBgn0036609 FBgn0036605 FBgn0036606 FBgn0052160 FBgn0036602 FBgn0267223 FBgn0267224
3L	17366900	17386900	1	0.769935	FBgn0036715 FBgn0036716
3R	22054278	22074278	1	0.769772
3L	1520000	1540000	1	0.769245	FBgn0053971 FBgn0035228 FBgn0035227
3R	23374278	23394278	1	0.769238	FBgn0051515 FBgn0263217 FBgn0039075
2R	13732495	13752495	1	0.768864
3R	27974278	27994278	1	0.768824	FBgn0039568
3R	24414278	24434278	1	0.768275
3R	16694278	16714278	1	0.768261
2R	21152495	21172495	1	0.768129	FBgn0050206 FBgn0050208 FBgn0011871 FBgn0261067 FBgn0034598 FBgn0034599
3L	9186900	9206900	1	0.768033
2L	5060000	5080000	1	0.767983	FBgn0262213 FBgn0028572 FBgn0264368 FBgn0261608 FBgn0266829 FBgn0266843
2L	6720000	6740000	1	0.767923	FBgn0031853 FBgn0046704
2R	15552495	15572495	1	0.76744	FBgn0034031 FBgn0013762 FBgn0034032 FBgn0024754
2R	22932477	22952477	1	0.767276	FBgn0034802 FBgn0034804 FBgn0261584 FBgn0034803
3R	19994278	20014278	1	0.766922	FBgn0038761 FBgn0038760
3R	15474278	15494278	1	0.766514	FBgn0019940 FBgn0038343 FBgn0038342 FBgn0038344
2L	10040000	10060000	1	0.766413	FBgn0266168 FBgn0266169 FBgn0053302 FBgn0053301
2R	16752495	16772495	1	0.765462	FBgn0034154 FBgn0259738 FBgn0085218 FBgn0034156
3L	16926900	16946900	1	0.76545	FBgn0036681 FBgn0036679 FBgn0036678
3R	25494278	25514278	1	0.764722	FBgn0039343 FBgn0263411 FBgn0263410 FBgn0266253 FBgn0267211 FBgn0039342
2L	8160000	8180000	1	0.764584	FBgn0031992
3R	24374278	24394278	1	0.764335	FBgn0086610 FBgn0039197 FBgn0039199 FBgn0039198 FBgn0039200
3R	25694278	25714278	1	0.764259
3R	16374278	16394278	1	0.763918
2L	19220000	19240000	1	0.76381
2R	13012495	13032495	1	0.76355
2L	11860000	11880000	1	0.763505
3L	9506900	9526900	1	0.763246	FBgn0053701 FBgn0053702 FBgn0053703 FBgn0267534 FBgn0086075 FBgn0053700 FBgn0010408
3R	13874278	13894278	1	0.763127
2R	17072495	17092495	1	0.76304	FBgn0010591
2R	22492495	22512495	1	0.763029
2L	760000	780000	1	0.762973	FBgn0265825 FBgn0031276 FBgn0031277 FBgn0040725
3L	1960000	1980000	1	0.762877	FBgn0267477 FBgn0267478 FBgn0035298 FBgn0035300 FBgn0035299 FBgn0027547
3R	28334278	28354278	1	0.762638	FBgn0267773 FBgn0267774 FBgn0039582 FBgn0039581 FBgn0039580
3R	25474278	25494278	1	0.762455	FBgn0039336 FBgn0039337 FBgn0039341 FBgn0259991 FBgn0040212 FBgn0039338 FBgn0265068 FBgn0039339
3R	17254278	17274278	1	0.76232	FBgn0265197 FBgn0265198
3R	19914278	19934278	1	0.762063	FBgn0267707 FBgn0038750 FBgn0262971 FBgn0038753 FBgn0038752 FBgn0038751 FBgn0260234 FBgn0038749
3L	8806900	8826900	1	0.761946	FBgn0035932 FBgn0035933 FBgn0052024
2L	9400000	9420000	1	0.761766
2L	7160000	7180000	1	0.761676	FBgn0267929 FBgn0265824 FBgn0265821
3L	5766900	5786900	1	0.761536	FBgn0040298 FBgn0267481 FBgn0035632 FBgn0044419 FBgn0260458 FBgn0035636 FBgn0266384 FBgn0052418 FBgn0260936
2L	9760000	9780000	1	0.761395	FBgn0065109 FBgn0065108 FBgn0265001 FBgn0032144 FBgn0032143 FBgn0011291 FBgn0025117
3R	25994278	26014278	1	0.761244	FBgn0002733 FBgn0002735 FBgn0002734 FBgn0262576 FBgn0266397 FBgn0266398 FBgn0266399 FBgn0002732
2L	3540000	3560000	1	0.761233
3R	20934278	20954278	1	0.761197
3L	5546900	5566900	1	0.761035	FBgn0040239 FBgn0029121 FBgn0010894 FBgn0029118
3L	19386900	19406900	1	0.76065	FBgn0036868 FBgn0264697
3R	28934278	28954278	1	0.759998
2L	8900000	8920000	1	0.759814
2L	5080000	5100000	1	0.759729	FBgn0031683 FBgn0031682
3R	30594278	30614278	1	0.759598	FBgn0051019 FBgn0051016 FBgn0051017 FBgn0051021
2L	3240000	3260000	1	0.759319
3L	16106900	16126900	1	0.759085	FBgn0010280 FBgn0036571
2L	8520000	8540000	1	0.758854	FBgn0016122 FBgn0085470 FBgn0250903
2R	21212495	21232495	1	0.758697	FBgn0034605 FBgn0027073
3R	14734278	14754278	1	0.758547	FBgn0038257
3L	8106900	8126900	1	0.758439	FBgn0262716 FBgn0262442 FBgn0028379 FBgn0027549 FBgn0035838 FBgn0042112 FBgn0035839 FBgn0026252
2R	21072495	21092495	1	0.757959	FBgn0034585 FBgn0003748
2L	16360000	16380000	1	0.757576	FBgn0028841
2R	15672495	15692495	1	0.756921	FBgn0050082 FBgn0266708 FBgn0053139 FBgn0050090 FBgn0050088 FBgn0262512 FBgn0034035 FBgn0050091 FBgn0263377 FBgn0266636
3L	2040000	2060000	1	0.75667
3R	30034278	30054278	1	0.756617	FBgn0003512 FBgn0003511 FBgn0003510 FBgn0039742 FBgn0041102 FBgn0039740 FBgn0264837 FBgn0001280 FBgn0001281 FBgn0039741 FBgn0264838 FBgn0002626
2L	9600000	9620000	1	0.75647	FBgn0040070 FBgn0019809
3R	20074278	20094278	1	0.7564	FBgn0003249
3R	23434278	23454278	1	0.756271
3L	16326900	16346900	1	0.755844	FBgn0267553 FBgn0040794 FBgn0036612 FBgn0053060 FBgn0040074 FBgn0040795 FBgn0036610 FBgn0053061
2R	22432495	22452495	1	0.755638
2L	3840000	3860000	1	0.755593	FBgn0266318 FBgn0267007 FBgn0267006 FBgn0267005
3R	14414278	14434278	1	0.755264	FBgn0265065 FBgn0085417
2L	3120000	3140000	1	0.755183	FBgn0031504
2L	8860000	8880000	1	0.754994	FBgn0052988 FBgn0052987 FBgn0052986 FBgn0052983 FBgn0265587 FBgn0032072 FBgn0266798
3L	4340000	4360000	1	0.753447	FBgn0266649
3R	18514278	18534278	1	0.753423
2L	12160000	12180000	1	0.752953	FBgn0263088 FBgn0051860 FBgn0032419 FBgn0032421 FBgn0051861 FBgn0032422 FBgn0032420
2R	16552495	16572495	1	0.752886	FBgn0034137 FBgn0034138 FBgn0034136
3R	22314278	22334278	1	0.752616	FBgn0053721 FBgn0038941 FBgn0038942 FBgn0038943 FBgn0267994
3R	31054278	31074278	1	0.752474
3L	6846900	6866900	1	0.751915	FBgn0266590
2R	14172495	14192495	1	0.751901	FBgn0000289 FBgn0033907
3R	30074278	30094278	1	0.75181
2L	7980000	8000000	1	0.751531	FBgn0031971 FBgn0266331 FBgn0031969 FBgn0031968 FBgn0031970
3R	11314278	11334278	1	0.751301
3L	2080000	2100000	1	0.750541	FBgn0262107
3L	11146900	11166900	1	0.750364	FBgn0052076 FBgn0036139 FBgn0264721
3L	2960000	2980000	1	0.750301	FBgn0265723 FBgn0035382
2L	11080000	11100000	1	0.750201	FBgn0032338 FBgn0032337 FBgn0032339
3R	14334278	14354278	1	0.74957
3R	17094278	17114278	1	0.74926
3R	29434278	29454278	1	0.749242
3R	23154278	23174278	1	0.74916	FBgn0039058 FBgn0039059
2L	7480000	7500000	1	0.748875	FBgn0011283
2L	10820000	10840000	1	0.748847	FBgn0032304
3R	14054278	14074278	1	0.74882
3R	30994278	31014278	1	0.748701
2R	17312495	17332495	1	0.748287
2R	21192495	21212495	1	0.747978	FBgn0265191 FBgn0034602
2R	18932495	18952495	1	0.747733
3L	13906900	13926900	1	0.747582
3L	7366900	7386900	1	0.747135	FBgn0016983 FBgn0082598 FBgn0052380
3R	18334278	18354278	1	0.7471
2R	22012495	22032495	1	0.746515
2R	14992495	15012495	1	0.746488	FBgn0264378
2L	10340000	10360000	1	0.746234	FBgn0032228 FBgn0032225 FBgn0032224 FBgn0032229 FBgn0051715 FBgn0085396
3L	1440000	1460000	1	0.74621
2R	19152495	19172495	1	0.745874
3L	11026900	11046900	1	0.74542	FBgn0265740 FBgn0052081
3L	12246900	12266900	1	0.744843
3R	14434278	14454278	1	0.744772
2R	22412495	22432495	1	0.744648	FBgn0034730 FBgn0034728 FBgn0034729 FBgn0034727 FBgn0022986 FBgn0022985 FBgn0266645
3L	15806900	15826900	1	0.744268	FBgn0036534 FBgn0036531 FBgn0036532 FBgn0015025 FBgn0261722
3R	19874278	19894278	1	0.744057	FBgn0038742 FBgn0014006 FBgn0002940 FBgn0038741
3R	21154278	21174278	1	0.743818	FBgn0038865 FBgn0038866 FBgn0260004
3R	24814278	24834278	1	0.743422	FBgn0262722 FBgn0262962 FBgn0027617 FBgn0267765 FBgn0039229 FBgn0051357 FBgn0045980 FBgn0051118
2L	15040000	15060000	1	0.743245	FBgn0053679 FBgn0000317
2R	19052495	19072495	1	0.743164	FBgn0034415 FBgn0034416
3L	4300000	4320000	1	0.7431	FBgn0052251
2L	18860000	18880000	1	0.742448	FBgn0263568
2L	18740000	18760000	1	0.742274	FBgn0032709
3R	20534278	20554278	1	0.741947	FBgn0053192 FBgn0016917
3R	26794278	26814278	1	0.741491	FBgn0086060
3R	15914278	15934278	1	0.741359	FBgn0038386 FBgn0038385 FBgn0267692 FBgn0085305
2L	7360000	7380000	1	0.741233	FBgn0264872 FBgn0031903
2L	9980000	10000000	1	0.741123	FBgn0040965 FBgn0000180
2L	8260000	8280000	1	0.740728
2L	7180000	7200000	1	0.739967	FBgn0031895 FBgn0031893 FBgn0031894
3L	7466900	7486900	1	0.739641	FBgn0262984 FBgn0035787 FBgn0035788
3R	15514278	15534278	1	0.739554	FBgn0051296
2R	14332495	14352495	1	0.739487
3L	18826900	18846900	1	0.739384	FBgn0052027 FBgn0036816
2L	9540000	9560000	1	0.739372	FBgn0032127 FBgn0032124 FBgn0032125 FBgn0032126
3L	9246900	9266900	1	0.739126	FBgn0035971
3R	29354278	29374278	1	0.73911	FBgn0267106 FBgn0267107
2L	7500000	7520000	1	0.738927
3R	25534278	25554278	1	0.73802
3L	14206900	14226900	1	0.737961	FBgn0036415
2L	4400000	4420000	1	0.737911	FBgn0051963 FBgn0053003 FBgn0262357 FBgn0031601
2R	17672495	17692495	1	0.73784	FBgn0034261 FBgn0016059 FBgn0260764 FBgn0260763
2R	11672495	11692495	1	0.737753	FBgn0010516 FBgn0033644 FBgn0040491 FBgn0033645
2L	7420000	7440000	1	0.737706	FBgn0031912 FBgn0262453 FBgn0262458 FBgn0264439 FBgn0031913
2R	10992495	11012495	1	0.737021
2L	4720000	4740000	1	0.736968	FBgn0031626
2L	3460000	3480000	1	0.736207	FBgn0263526 FBgn0031540 FBgn0051956 FBgn0021967 FBgn0005616 FBgn0031538 FBgn0261560 FBgn0051776 FBgn0266912 FBgn0264549
2R	14952495	14972495	1	0.73609
3R	17974278	17994278	1	0.735408
2R	11352495	11372495	1	0.735078	FBgn0033627 FBgn0011987 FBgn0010358 FBgn0015001 FBgn0050025 FBgn0001276 FBgn0024188 FBgn0041241 FBgn0033624 FBgn0033623 FBgn0021795
2L	13820000	13840000	1	0.735024	FBgn0000153 FBgn0004406 FBgn0015271 FBgn0064115 FBgn0004407 FBgn0026373 FBgn0260407 FBgn0001961
2L	18620000	18640000	1	0.734392
3L	10426900	10446900	1	0.734265	FBgn0036083 FBgn0052058
3R	24094278	24114278	1	0.734006	FBgn0053536 FBgn0039147 FBgn0039150 FBgn0013343 FBgn0039149
3R	28634278	28654278	1	0.733602	FBgn0039592 FBgn0267952 FBgn0039591 FBgn0051050
2R	13632495	13652495	1	0.733533
3R	27594278	27614278	1	0.733475	FBgn0039528
2L	7240000	7260000	1	0.733018	FBgn0031900 FBgn0051909
2R	18492495	18512495	1	0.732859	FBgn0034354
3R	10934278	10954278	1	0.732043	FBgn0037857
3R	9174278	9194278	1	0.73204	FBgn0037662
2R	16852495	16872495	1	0.7319	FBgn0263462 FBgn0025832 FBgn0034162 FBgn0014870 FBgn0026533 FBgn0028737
2R	13452495	13472495	1	0.731672
3R	11294278	11314278	1	0.731611	FBgn0266415
2L	8500000	8520000	1	0.730399	FBgn0032050 FBgn0032054 FBgn0032052 FBgn0032053 FBgn0032051
3L	11886900	11906900	1	0.730188	FBgn0263615 FBgn0036220
3L	11806900	11826900	1	0.730105	FBgn0083015 FBgn0036210 FBgn0052095 FBgn0036213 FBgn0036211 FBgn0036212
2R	15972495	15992495	1	0.729707	FBgn0034058 FBgn0034057 FBgn0266379
3R	16194278	16214278	1	0.729398	FBgn0010438 FBgn0038407 FBgn0051287 FBgn0267197 FBgn0267200 FBgn0267202 FBgn0267198 FBgn0267199
3R	16494278	16514278	1	0.729231	FBgn0038440 FBgn0028381
2L	4980000	5000000	1	0.72894	FBgn0083962
3R	21494278	21514278	1	0.728342	FBgn0264824 FBgn0004863
3L	9786900	9806900	1	0.728145	FBgn0044051 FBgn0044050 FBgn0036046 FBgn0044049 FBgn0036044
3L	10226900	10246900	1	0.727375	FBgn0265734 FBgn0036078 FBgn0265735 FBgn0266952
2R	21952495	21972495	1	0.727046	FBgn0085398 FBgn0034671 FBgn0263324 FBgn0054029
3L	12266900	12286900	1	0.726315	FBgn0267961 FBgn0036271 FBgn0036273 FBgn0036272 FBgn0052100
3R	25514278	25534278	1	0.726272
3R	24054278	24074278	1	0.726265	FBgn0040283 FBgn0039145 FBgn0001230 FBgn0264906
3L	17706900	17726900	1	0.726255	FBgn0261294
3L	8886900	8906900	1	0.726135	FBgn0267531 FBgn0262788 FBgn0052034 FBgn0020633 FBgn0035934
3R	23654278	23674278	1	0.726084
2L	11840000	11860000	1	0.726016	FBgn0032381 FBgn0051704 FBgn0040968 FBgn0032382 FBgn0264564 FBgn0259989 FBgn0261805 FBgn0264750
2L	1360000	1380000	1	0.725849	FBgn0031337
3R	16294278	16314278	1	0.725558	FBgn0038412
2R	20452495	20472495	1	0.724752
3L	10786900	10806900	1	0.724637	FBgn0265738 FBgn0265739 FBgn0267950 FBgn0267951 FBgn0036102 FBgn0265447
3L	1480000	1500000	1	0.724457	FBgn0267462 FBgn0086670 FBgn0263839 FBgn0043458 FBgn0263471
3L	940000	960000	1	0.723563
2L	15000000	15020000	1	0.723492	FBgn0028926 FBgn0001974 FBgn0040228 FBgn0261882 FBgn0264438 FBgn0261881
2R	10392495	10412495	1	0.723421	FBgn0053477 FBgn0053475 FBgn0262806 FBgn0033516 FBgn0053476
3R	11074278	11094278	1	0.723339	FBgn0263403 FBgn0266245
2L	19820000	19840000	1	0.723285
2L	8320000	8340000	1	0.722923	FBgn0032020 FBgn0032022 FBgn0032021
3L	16286900	16306900	1	0.722282	FBgn0036597 FBgn0267550 FBgn0036595 FBgn0036600 FBgn0036599 FBgn0036598 FBgn0036596 FBgn0262894
2R	16832495	16852495	1	0.722245	FBgn0265659 FBgn0265660 FBgn0026754
3R	13794278	13814278	1	0.72218	FBgn0051588 FBgn0051331
3L	16766900	16786900	1	0.722175	FBgn0036661 FBgn0036662 FBgn0036660
2L	5220000	5240000	1	0.721987
3L	17626900	17646900	1	0.72141	FBgn0265759 FBgn0265760 FBgn0261454 FBgn0262531 FBgn0036742 FBgn0004401
3L	11706900	11726900	1	0.721124	FBgn0261353 FBgn0261381 FBgn0040817 FBgn0036198
3R	28414278	28434278	1	0.72004	FBgn0267775
2L	2940000	2960000	1	0.719971
2R	18272495	18292495	1	0.719847	FBgn0053198 FBgn0266420
2R	18412495	18432495	1	0.7192	FBgn0034345 FBgn0034346
3R	17074278	17094278	1	0.718578	FBgn0266465 FBgn0038476 FBgn0038478
2L	800000	820000	1	0.718559	FBgn0031283 FBgn0086130 FBgn0051658 FBgn0031282 FBgn0031284 FBgn0031281
2R	17752495	17772495	1	0.718433	FBgn0263629 FBgn0034278 FBgn0034276 FBgn0022740 FBgn0027572 FBgn0034277 FBgn0265589 FBgn0034279
2R	21452495	21472495	1	0.718306
2R	12372495	12392495	1	0.718285	FBgn0033723 FBgn0050042 FBgn0033724 FBgn0033721 FBgn0050045 FBgn0033726 FBgn0033725
2L	6860000	6880000	1	0.718276	FBgn0031865 FBgn0266220 FBgn0266219
3R	10974278	10994278	1	0.717986
3R	12254278	12274278	1	0.717793	FBgn0267677 FBgn0267922 FBgn0259975 FBgn0038009 FBgn0264829 FBgn0264830 FBgn0264831
2L	7080000	7100000	1	0.717654	FBgn0267915
3L	1060000	1080000	1	0.716318
3R	18874278	18894278	1	0.716124	FBgn0038654
3L	6646900	6666900	1	0.716092	FBgn0035709 FBgn0266683
3R	21974278	21994278	1	0.716023
3L	2380000	2400000	1	0.716012	FBgn0052298 FBgn0261858 FBgn0052299
3R	17714278	17734278	1	0.715357	FBgn0038539 FBgn0261987 FBgn0016650
3R	22894278	22914278	1	0.71524
3R	18894278	18914278	1	0.714961	FBgn0038658 FBgn0038659 FBgn0038655 FBgn0003248 FBgn0085313 FBgn0038656 FBgn0038660
3R	18154278	18174278	1	0.714588	FBgn0266564 FBgn0266565 FBgn0038569 FBgn0038568 FBgn0022943 FBgn0038571 FBgn0038570
3L	7226900	7246900	1	0.714485	FBgn0016036 FBgn0035750 FBgn0261111 FBgn0024542 FBgn0028648 FBgn0035753 FBgn0035751
3L	14226900	14246900	1	0.714337	FBgn0265754 FBgn0036417 FBgn0085273 FBgn0036416 FBgn0266948
3L	18126900	18146900	1	0.713622	FBgn0020300 FBgn0036778 FBgn0265880
3R	21954278	21974278	1	0.713585
2R	20532495	20552495	1	0.713461	FBgn0050145 FBgn0043536 FBgn0034518 FBgn0034519 FBgn0034513 FBgn0034515 FBgn0034517 FBgn0050148 FBgn0034514 FBgn0265863 FBgn0050154 FBgn0034512
2R	20712495	20732495	1	0.712837	FBgn0265871 FBgn0034546
3L	14566900	14586900	1	0.712789	FBgn0261816
3R	10594278	10614278	1	0.71216
3R	23334278	23354278	1	0.712026
3L	12226900	12246900	1	0.711677	FBgn0264723
3L	9006900	9026900	1	0.711665	FBgn0035955 FBgn0035956
2R	17792495	17812495	1	0.711651	FBgn0028743 FBgn0266808
3R	23274278	23294278	1	0.71139	FBgn0025781 FBgn0039071 FBgn0039069 FBgn0039070
2R	11752495	11772495	1	0.710922	FBgn0033650
3L	5826900	5846900	1	0.710707
3R	29394278	29414278	1	0.710692
3R	27934278	27954278	1	0.71021	FBgn0039560 FBgn0039563 FBgn0039562 FBgn0039561
3R	28314278	28334278	1	0.709784
2R	11092495	11112495	1	0.709503
2L	17700000	17720000	1	0.709459	FBgn0262876
2R	16152495	16172495	1	0.709361	FBgn0267656 FBgn0267655 FBgn0034084 FBgn0034082
2L	8620000	8640000	1	0.70929	FBgn0051602
3R	26014278	26034278	1	0.709256	FBgn0002631 FBgn0002592 FBgn0002632 FBgn0263652 FBgn0263653 FBgn0266400 FBgn0002578 FBgn0002609 FBgn0002629
3L	18246900	18266900	1	0.708966	FBgn0036783
2L	8460000	8480000	1	0.708922	FBgn0053194 FBgn0029173
3R	20954278	20974278	1	0.7084
3L	4100000	4120000	1	0.708343	FBgn0035498 FBgn0028484 FBgn0267230
3L	15266900	15286900	1	0.708296
2R	14712495	14732495	1	0.708172
3R	14674278	14694278	1	0.707511
3L	5686900	5706900	1	0.707393
3R	12074278	12094278	1	0.707309
3R	12214278	12234278	1	0.707181	FBgn0038002 FBgn0038000 FBgn0267676 FBgn0263454 FBgn0038001 FBgn0011270 FBgn0037997 FBgn0038003 FBgn0037999
2L	1440000	1460000	1	0.706792	FBgn0263321
2R	21172495	21192495	1	0.706566	FBgn0011872 FBgn0053539 FBgn0050209 FBgn0034601 FBgn0003162
2L	9500000	9520000	1	0.705955
3R	27194278	27214278	1	0.705492
2L	1140000	1160000	1	0.705353	FBgn0031307 FBgn0261458 FBgn0264267 FBgn0031308 FBgn0031309 FBgn0031310 FBgn0267281
2R	15512495	15532495	1	0.704978	FBgn0019968
2L	2960000	2980000	1	0.70485	FBgn0260639 FBgn0031483 FBgn0004584 FBgn0024920 FBgn0031485 FBgn0031484
2L	6200000	6220000	1	0.704387
2R	11132495	11152495	1	0.704373	FBgn0033580 FBgn0033578 FBgn0033581
2R	20552495	20572495	1	0.7043	FBgn0034520 FBgn0265864 FBgn0034521 FBgn0263000
3R	28614278	28634278	1	0.704003
3L	14946900	14966900	1	0.703417	FBgn0267640
3L	14386900	14406900	1	0.703311	FBgn0036422
2L	6000000	6020000	1	0.703285	FBgn0031762 FBgn0264448 FBgn0031760 FBgn0001089 FBgn0001170
3L	10846900	10866900	1	0.703083	FBgn0266679
3R	26754278	26774278	1	0.702828	FBgn0267123 FBgn0267122
3R	27614278	27634278	1	0.702478	FBgn0039529
2L	8880000	8900000	1	0.702056	FBgn0265588 FBgn0261630
3L	17226900	17246900	1	0.701535	FBgn0036703 FBgn0036702
3L	2740000	2760000	1	0.701345
2L	11340000	11360000	1	0.700506	FBgn0265797 FBgn0032360
3R	28974278	28994278	1	0.699671
2R	19032495	19052495	1	0.699289	FBgn0034413
2L	9560000	9580000	1	0.698973	FBgn0028479 FBgn0264998 FBgn0051709 FBgn0032130
3L	4120000	4140000	1	0.698954	FBgn0004574 FBgn0260985 FBgn0264693
3L	11406900	11426900	1	0.698741	FBgn0036157
2L	3600000	3620000	1	0.698116	FBgn0265369 FBgn0002985
2R	13552495	13572495	1	0.698108	FBgn0083006 FBgn0263459 FBgn0014877 FBgn0263472 FBgn0033855 FBgn0033856
3L	14726900	14746900	1	0.698065	FBgn0036442 FBgn0036443
2R	16692495	16712495	1	0.697242
3L	10886900	10906900	1	0.697107	FBgn0036111 FBgn0036110 FBgn0036108 FBgn0036109 FBgn0266681
3R	20654278	20674278	1	0.697043	FBgn0038819
3R	28294278	28314278	1	0.697018	FBgn0267772 FBgn0039577 FBgn0265160
3L	17286900	17306900	1	0.69696
3R	26254278	26274278	1	0.696856	FBgn0265380
3R	25114278	25134278	1	0.696779	FBgn0051510 FBgn0259152 FBgn0046214 FBgn0260229 FBgn0039280
3R	9854278	9874278	1	0.696687
3L	7006900	7026900	1	0.696333	FBgn0035730
2L	11740000	11760000	1	0.696233	FBgn0259962 FBgn0259961 FBgn0259960 FBgn0264993
3R	21894278	21914278	1	0.696095	FBgn0038918
3L	15766900	15786900	1	0.695854
3R	14294278	14314278	1	0.695011	FBgn0003567 FBgn0038221 FBgn0004855
3R	13554278	13574278	1	0.69498
3R	14534278	14554278	1	0.694971	FBgn0267687
3L	9146900	9166900	1	0.694459
2R	9032495	9052495	1	0.694126	FBgn0033366 FBgn0033367
2R	13372495	13392495	1	0.693796	FBgn0033830
2R	20492495	20512495	1	0.693534	FBgn0043535 FBgn0034509 FBgn0043534 FBgn0265856 FBgn0265857 FBgn0265858 FBgn0265859 FBgn0265860 FBgn0265855
2L	8140000	8160000	1	0.693053	FBgn0263561 FBgn0263256 FBgn0051606 FBgn0261831 FBgn0261830
3R	15994278	16014278	1	0.693023	FBgn0262028
3R	23174278	23194278	1	0.692588
2L	14200000	14220000	1	0.692518
2L	4860000	4880000	1	0.692508
2R	20012495	20032495	1	0.692091	FBgn0265840 FBgn0265841
3L	9046900	9066900	1	0.692056	FBgn0035957 FBgn0000116
2L	18940000	18960000	1	0.691891	FBgn0262095 FBgn0032724 FBgn0265953 FBgn0265954 FBgn0032726 FBgn0032725 FBgn0032727
3L	4600000	4620000	1	0.691885
2L	12140000	12160000	1	0.69183
2R	17052495	17072495	1	0.691752	FBgn0026721 FBgn0034186 FBgn0034187 FBgn0086350
2L	520000	540000	1	0.691254
3R	20554278	20574278	1	0.69101	FBgn0038804 FBgn0038803 FBgn0043457 FBgn0040575
3L	15866900	15886900	1	0.690826	FBgn0264842 FBgn0264843
2L	6520000	6540000	1	0.690579
3R	28114278	28134278	1	0.690541
2L	17520000	17540000	1	0.690446	FBgn0032649 FBgn0032647 FBgn0032648
3R	23094278	23114278	1	0.690163	FBgn0039051 FBgn0039052 FBgn0039053
3R	13274278	13294278	1	0.690093	FBgn0038134 FBgn0038130 FBgn0038133 FBgn0038132 FBgn0038131
2R	14732495	14752495	1	0.690041	FBgn0010388 FBgn0041581 FBgn0012042 FBgn0033958 FBgn0263376
2L	9940000	9960000	1	0.689655	FBgn0262428 FBgn0032171 FBgn0267611 FBgn0032169 FBgn0032168 FBgn0032167
2R	19832495	19852495	1	0.689422	FBgn0265762
2L	5320000	5340000	1	0.689115	FBgn0031701 FBgn0031702 FBgn0031700 FBgn0015031 FBgn0266320
2L	7220000	7240000	1	0.689009	FBgn0266324 FBgn0264343 FBgn0264344 FBgn0263133
2L	4940000	4960000	1	0.688837	FBgn0031650 FBgn0015000 FBgn0031651 FBgn0031655 FBgn0031653 FBgn0031652 FBgn0020906 FBgn0031654
2L	9660000	9680000	1	0.688689	FBgn0267927 FBgn0264999
2L	7580000	7600000	1	0.688672	FBgn0083141
3R	14814278	14834278	1	0.688562
2L	16980000	17000000	1	0.688438	FBgn0265581 FBgn0265579 FBgn0051806 FBgn0266896 FBgn0266897
2R	16932495	16952495	1	0.688385	FBgn0264330 FBgn0034168 FBgn0264329 FBgn0262513 FBgn0085219
3L	6906900	6926900	1	0.688132	FBgn0041194
2R	12292495	12312495	1	0.688105	FBgn0033710 FBgn0061197 FBgn0033708 FBgn0266809
3R	26694278	26714278	1	0.687993	FBgn0023179
2L	6180000	6200000	1	0.686785
3R	23914278	23934278	1	0.686428	FBgn0264741 FBgn0051141 FBgn0039129 FBgn0039126 FBgn0039128 FBgn0039125 FBgn0047114 FBgn0264740 FBgn0015282
3L	10366900	10386900	1	0.686283
2L	12120000	12140000	1	0.685753	FBgn0032415
2L	1620000	1640000	1	0.685254
3R	22014278	22034278	1	0.685008	FBgn0038921 FBgn0019960 FBgn0019957 FBgn0038926 FBgn0038925 FBgn0038924 FBgn0038923 FBgn0038922
3R	15454278	15474278	1	0.684972
2L	10080000	10100000	1	0.684854	FBgn0032181
2L	7960000	7980000	1	0.684567
2R	21292495	21312495	1	0.684262	FBgn0034614 FBgn0016726 FBgn0261554 FBgn0034617 FBgn0265937 FBgn0266642
2L	8100000	8120000	1	0.684186
2L	18640000	18660000	1	0.684184	FBgn0032693
3L	15026900	15046900	1	0.684044	FBgn0025776 FBgn0036465
3R	11574278	11594278	1	0.683799	FBgn0037916 FBgn0037915 FBgn0037917 FBgn0037918
3R	25654278	25674278	1	0.683546	FBgn0267770 FBgn0261986 FBgn0266735
3L	4640000	4660000	1	0.683057	FBgn0267480 FBgn0052238
2R	13232495	13252495	1	0.6826	FBgn0033817 FBgn0033815 FBgn0033816 FBgn0002789 FBgn0266816 FBgn0033818
3L	14186900	14206900	1	0.681721	FBgn0052141
2R	21372495	21392495	1	0.681294	FBgn0034628 FBgn0034627 FBgn0034626 FBgn0034629
3L	6006900	6026900	1	0.68101	FBgn0035657
3R	23414278	23434278	1	0.680953	FBgn0263777
2R	20872495	20892495	1	0.680949	FBgn0034558
2R	21092495	21112495	1	0.680573	FBgn0011824
2R	19852495	19872495	1	0.680545	FBgn0265764 FBgn0265763 FBgn0043532 FBgn0265653
3R	31194278	31214278	1	0.680475	FBgn0267435 FBgn0039827 FBgn0061476
3R	26854278	26874278	1	0.679927	FBgn0262379 FBgn0027889 FBgn0039459 FBgn0026562 FBgn0001197
3R	18174278	18194278	1	0.67989	FBgn0261532 FBgn0038575 FBgn0038579 FBgn0038576 FBgn0038578 FBgn0038577
2L	1120000	1140000	1	0.679588	FBgn0031304 FBgn0031305
3R	17454278	17474278	1	0.679442	FBgn0038512
2L	12300000	12320000	1	0.679069	FBgn0266820 FBgn0266821
2R	19112495	19132495	1	0.678791	FBgn0034417
2L	2640000	2660000	1	0.67874	FBgn0264434 FBgn0264433 FBgn0031442 FBgn0026395 FBgn0031443 FBgn0031441 FBgn0053125
3R	25234278	25254278	1	0.678225	FBgn0039301 FBgn0039300 FBgn0039297 FBgn0039298 FBgn0039299 FBgn0000158
3R	23214278	23234278	1	0.678161
3L	12846900	12866900	1	0.678037	FBgn0036319 FBgn0052107 FBgn0036318 FBgn0036320
3L	3880000	3900000	1	0.67753	FBgn0083987 FBgn0026592 FBgn0035469 FBgn0035470 FBgn0035468 FBgn0264518 FBgn0266971
3L	3680000	3700000	1	0.676715	FBgn0263495 FBgn0263496
3R	9914278	9934278	1	0.676505
3L	16026900	16046900	1	0.676456	FBgn0263570 FBgn0267549 FBgn0036560 FBgn0260646 FBgn0261634 FBgn0261633
2R	13992495	14012495	1	0.676236	FBgn0263539
3L	2000000	2020000	1	0.675539	FBgn0265728 FBgn0262030
3L	2320000	2340000	1	0.675487
3R	16334278	16354278	1	0.675467	FBgn0038418 FBgn0038419 FBgn0027095 FBgn0040284
3L	13006900	13026900	1	0.674825	FBgn0266709 FBgn0086078 FBgn0086079 FBgn0036337 FBgn0036331 FBgn0036335 FBgn0036333 FBgn0036332 FBgn0036334 FBgn0036336 FBgn0260441 FBgn0266994
3R	29014278	29034278	1	0.674787	FBgn0039621 FBgn0039622 FBgn0266404 FBgn0039625 FBgn0039623 FBgn0041780 FBgn0265204 FBgn0267127
3R	30734278	30754278	1	0.674451	FBgn0039801 FBgn0039800 FBgn0039799 FBgn0262883
2L	880000	900000	1	0.673497	FBgn0266887
2L	860000	880000	1	0.673083	FBgn0031289 FBgn0086031 FBgn0053526 FBgn0002936 FBgn0020305 FBgn0029095
3L	5506900	5526900	1	0.673035
3L	10926900	10946900	1	0.672982
3R	21614278	21634278	1	0.672807	FBgn0262434 FBgn0262405 FBgn0267722 FBgn0264826
2L	10020000	10040000	1	0.672746	FBgn0032176 FBgn0027600
3L	1400000	1420000	1	0.672452	FBgn0035216 FBgn0035217 FBgn0011854 FBgn0011855
3R	30254278	30274278	1	0.672349	FBgn0267782
3L	7246900	7266900	1	0.672309	FBgn0263447 FBgn0035755 FBgn0035754
3L	14106900	14126900	1	0.672306
2R	16972495	16992495	1	0.672229
3R	28674278	28694278	1	0.671972
3R	22034278	22054278	1	0.671872	FBgn0038928 FBgn0261455 FBgn0266581
2R	17892495	17912495	1	0.671679	FBgn0034284 FBgn0034283
3R	21914278	21934278	1	0.671012
3R	25554278	25574278	1	0.670733
3L	1360000	1380000	1	0.670722
2R	16212495	16232495	1	0.670425	FBgn0050238 FBgn0050239 FBgn0050240 FBgn0264496 FBgn0034092 FBgn0034094 FBgn0034093
3L	12106900	12126900	1	0.670393	FBgn0011335 FBgn0036248 FBgn0036249 FBgn0022959
3R	24114278	24134278	1	0.66995	FBgn0039153
3L	9986900	10006900	1	0.669618	FBgn0267536 FBgn0267537
3R	14654278	14674278	1	0.669345	FBgn0038252 FBgn0038251 FBgn0025808 FBgn0038250
3R	24514278	24534278	1	0.669333	FBgn0039203 FBgn0039205 FBgn0039201 FBgn0003134 FBgn0039204 FBgn0039202 FBgn0264791
2L	12600000	12620000	1	0.668377
2L	11200000	11220000	1	0.667527	FBgn0264441
3L	5566900	5586900	1	0.667207	FBgn0065097 FBgn0015766
3R	17754278	17774278	1	0.66687
3R	13594278	13614278	1	0.666572	FBgn0003060 FBgn0038160
3L	12346900	12366900	1	0.666326
3R	16114278	16134278	1	0.666164
3R	18774278	18794278	1	0.666137
2R	13052495	13072495	1	0.665811
3R	27074278	27094278	1	0.664845	FBgn0039480 FBgn0039479 FBgn0039481 FBgn0039482
3R	11254278	11274278	1	0.6641
3R	14794278	14814278	1	0.663754	FBgn0038260 FBgn0038261 FBgn0038262
3L	13246900	13266900	1	0.663476	FBgn0011844
3L	7146900	7166900	1	0.66296	FBgn0040837
2R	16892495	16912495	1	0.662919	FBgn0262307 FBgn0004784
3L	8906900	8926900	1	0.662306	FBgn0264701
3R	18954278	18974278	1	0.662029
2L	4420000	4440000	1	0.661656	FBgn0085206 FBgn0085207 FBgn0262358
2R	21912495	21932495	1	0.661572
2L	8340000	8360000	1	0.661376	FBgn0051901 FBgn0032024 FBgn0266911 FBgn0032025
3L	7286900	7306900	1	0.661145
3R	26194278	26214278	1	0.661058
3R	18854278	18874278	1	0.660874
2L	5240000	5260000	1	0.660554	FBgn0051914 FBgn0051971 FBgn0265957 FBgn0046776
3R	28914278	28934278	1	0.659777	FBgn0039616
3R	18434278	18454278	1	0.659494
2R	15772495	15792495	1	0.659456
2R	15612495	15632495	1	0.659115
3R	21374278	21394278	1	0.658486	FBgn0004110 FBgn0004862
3L	16726900	16746900	1	0.658176	FBgn0004556 FBgn0036659 FBgn0043578
3L	2520000	2540000	1	0.657855	FBgn0260480
2R	23012477	23032477	1	0.657502
2R	12332495	12352495	1	0.656914	FBgn0050249 FBgn0050250 FBgn0050251 FBgn0266111 FBgn0011878 FBgn0011877 FBgn0033715 FBgn0054021 FBgn0033716 FBgn0033717
3L	13926900	13946900	1	0.656507	FBgn0001108
3R	19074278	19094278	1	0.656196
2L	540000	560000	1	0.656138	FBgn0031260 FBgn0010602 FBgn0031261 FBgn0005660
3R	19034278	19054278	1	0.65538
3L	15046900	15066900	1	0.654939	FBgn0263763 FBgn0263761 FBgn0263767 FBgn0036468 FBgn0036466 FBgn0263762 FBgn0036470 FBgn0036471 FBgn0036469 FBgn0036467
2L	13500000	13520000	1	0.654711
2L	10420000	10440000	1	0.6543	FBgn0032248 FBgn0267330 FBgn0032246 FBgn0032247 FBgn0004915 FBgn0032250 FBgn0027052 FBgn0032249 FBgn0262601 FBgn0005683
2R	18912495	18932495	1	0.6539
2R	11532495	11552495	1	0.653843
2R	22132495	22152495	1	0.653771	FBgn0029084 FBgn0034700
3L	10566900	10586900	1	0.653665
3R	27274278	27294278	1	0.653428	FBgn0046247 FBgn0039508 FBgn0015737 FBgn0040609 FBgn0039509 FBgn0039507
3R	25574278	25594278	1	0.653193	FBgn0262319 FBgn0267570 FBgn0039344
3L	6986900	7006900	1	0.652771	FBgn0045759
2L	7100000	7120000	1	0.652763
3R	16014278	16034278	1	0.652647
3R	28354278	28374278	1	0.652421
2R	19952495	19972495	1	0.65218	FBgn0265833 FBgn0265834
3L	6126900	6146900	1	0.65178	FBgn0020637 FBgn0052404 FBgn0020642 FBgn0052405 FBgn0020640 FBgn0020639 FBgn0020638 FBgn0086611 FBgn0020641 FBgn0042119
3R	24314278	24334278	1	0.651633	FBgn0267762 FBgn0028471 FBgn0011785 FBgn0039182
2R	16392495	16412495	1	0.651161
3R	23354278	23374278	1	0.651036	FBgn0016119 FBgn0024509 FBgn0265381 FBgn0262009 FBgn0262010 FBgn0039073 FBgn0002622
3R	21994278	22014278	1	0.650304
3L	17106900	17126900	1	0.649988
2R	19372495	19392495	1	0.649546	FBgn0034439 FBgn0034441 FBgn0034442 FBgn0034440
2R	21992495	22012495	1	0.649406
3L	1940000	1960000	1	0.649253	FBgn0002872 FBgn0035294 FBgn0035295
3R	10534278	10554278	1	0.649062
3L	12566900	12586900	1	0.648843
2R	23292477	23312477	1	0.648704	FBgn0034842
3R	29314278	29334278	1	0.64855	FBgn0015622
3L	3340000	3360000	1	0.647997
3R	16994278	17014278	1	0.647969	FBgn0266917 FBgn0038463 FBgn0038465 FBgn0038466 FBgn0038462
2R	10252495	10272495	1	0.647609	FBgn0033502 FBgn0033501 FBgn0050009
3L	780000	800000	1	0.647403
3R	18714278	18734278	1	0.646449	FBgn0275433 FBgn0038647 FBgn0038646 FBgn0038645 FBgn0085312
2L	13420000	13440000	1	0.646329	FBgn0026760
2R	17212495	17232495	1	0.646244
3R	18754278	18774278	1	0.645975
3R	22654278	22674278	1	0.645836
2L	18720000	18740000	1	0.645713	FBgn0265993 FBgn0265994
2R	21412495	21432495	1	0.645196
3R	17354278	17374278	1	0.645032	FBgn0265196
3L	4880000	4900000	1	0.644815	FBgn0035582
2R	8172495	8192495	1	0.644701
3R	23194278	23214278	1	0.644679	FBgn0011596
2R	18292495	18312495	1	0.64464	FBgn0034324 FBgn0034326 FBgn0040737 FBgn0034325 FBgn0034327 FBgn0034322 FBgn0034323
3L	9626900	9646900	1	0.644268	FBgn0036019 FBgn0036022 FBgn0036020 FBgn0036023 FBgn0036024
2L	6760000	6780000	1	0.643897	FBgn0031858
2L	18680000	18700000	1	0.643851	FBgn0032698 FBgn0032700 FBgn0032699 FBgn0005617
3L	11346900	11366900	1	0.643762	FBgn0036155 FBgn0266396 FBgn0266786
3L	10386900	10406900	1	0.643295
3R	11554278	11574278	1	0.642875	FBgn0037911 FBgn0037913 FBgn0037912
3R	31014278	31034278	1	0.642008
2R	11612495	11632495	1	0.641935	FBgn0264508 FBgn0086712
3L	1980000	2000000	1	0.640806
3L	16786900	16806900	1	0.640675
3L	5126900	5146900	1	0.640615	FBgn0035594 FBgn0035590 FBgn0267647 FBgn0035592 FBgn0035587 FBgn0040843 FBgn0266653 FBgn0040842 FBgn0035593 FBgn0035591 FBgn0035589 FBgn0035586 FBgn0035588
2R	14192495	14212495	1	0.640531	FBgn0005613 FBgn0033911
3R	25014278	25034278	1	0.640483	FBgn0039258 FBgn0015240 FBgn0039260 FBgn0039259
2R	15192495	15212495	1	0.640364	FBgn0259966 FBgn0259737 FBgn0050081 FBgn0033997 FBgn0033996 FBgn0033995 FBgn0264377
3L	12406900	12426900	1	0.6401	FBgn0020655
2L	9620000	9640000	1	0.640099	FBgn0051882
3R	15414278	15434278	1	0.639726	FBgn0262367 FBgn0262397 FBgn0262429 FBgn0267571
2R	17332495	17352495	1	0.639683
3L	18506900	18526900	1	0.639315
2L	6040000	6060000	1	0.639057	FBgn0262317 FBgn0029161 FBgn0031768 FBgn0085208 FBgn0000052 FBgn0031769
2L	10620000	10640000	1	0.638996	FBgn0032271 FBgn0266891
3R	21394278	21414278	1	0.638949	FBgn0267713 FBgn0038887 FBgn0038886 FBgn0038888 FBgn0051438
2L	9060000	9080000	1	0.638896	FBgn0032094 FBgn0265676
3R	13894278	13914278	1	0.638672	FBgn0000576
3L	5186900	5206900	1	0.638229
3R	12934278	12954278	1	0.638194
3R	30754278	30774278	1	0.638037
3L	6306900	6326900	1	0.637947	FBgn0041625
3R	25194278	25214278	1	0.637758	FBgn0039288 FBgn0039290 FBgn0022800
3L	14926900	14946900	1	0.636996	FBgn0040809 FBgn0040487
3L	1560000	1580000	1	0.636944	FBgn0035234 FBgn0035236
3L	14586900	14606900	1	0.636528
3R	19274278	19294278	1	0.636363	FBgn0263405 FBgn0265062
3L	9386900	9406900	1	0.635967	FBgn0035985 FBgn0015218
2R	17732495	17752495	1	0.63549	FBgn0034270 FBgn0085224 FBgn0034271 FBgn0034274 FBgn0003545 FBgn0034269 FBgn0034272
3L	520000	540000	1	0.634933	FBgn0266593 FBgn0266592 FBgn0085298
3L	16406900	16426900	1	0.633448	FBgn0028399 FBgn0027080 FBgn0036629
2R	16792495	16812495	1	0.633272	FBgn0265658 FBgn0040743 FBgn0034159
3L	3860000	3880000	1	0.633263	FBgn0266928
2L	9580000	9600000	1	0.632487	FBgn0263612 FBgn0032131
3R	11274278	11294278	1	0.632421
2R	16952495	16972495	1	0.632273	FBgn0011867 FBgn0265174 FBgn0265526 FBgn0265527 FBgn0034172 FBgn0034173
3R	15434278	15454278	1	0.632226	FBgn0000047
2L	22787268	22807268	1	0.632066	FBgn0058439
2L	7140000	7160000	1	0.63194	FBgn0265823
2R	21572495	21592495	1	0.631395	FBgn0050222 FBgn0053225
3R	12234278	12254278	1	0.630891	FBgn0038006 FBgn0038007 FBgn0264828 FBgn0267142
3R	21414278	21434278	1	0.630759
2R	11692495	11712495	1	0.630715	FBgn0053471 FBgn0033648 FBgn0266926
3L	11186900	11206900	1	0.630692	FBgn0036145 FBgn0036146 FBgn0036147
3R	24274278	24294278	1	0.630657	FBgn0085319 FBgn0039177 FBgn0019952 FBgn0039178 FBgn0263398 FBgn0267222
2L	6800000	6820000	1	0.630492	FBgn0031860 FBgn0031859 FBgn0264890 FBgn0031861
2L	7820000	7840000	1	0.630487	FBgn0027515 FBgn0266360 FBgn0004177 FBgn0020618
3L	3660000	3680000	1	0.630286
3L	13886900	13906900	1	0.62986
2L	9260000	9280000	1	0.62985	FBgn0266800
3L	9766900	9786900	1	0.629838
3L	6026900	6046900	1	0.629661	FBgn0264603 FBgn0040060 FBgn0035663 FBgn0250815 FBgn0035661
3L	9686900	9706900	1	0.62949	FBgn0015321 FBgn0267454 FBgn0036031 FBgn0266596
2L	18820000	18840000	1	0.629465	FBgn0027070 FBgn0032717 FBgn0032713 FBgn0015808 FBgn0032715
3L	9906900	9926900	1	0.628918
2R	10512495	10532495	1	0.628918
3L	9586900	9606900	1	0.628892	FBgn0036016 FBgn0267966 FBgn0036014 FBgn0036015
3L	13226900	13246900	1	0.628745
2R	14672495	14692495	1	0.628337	FBgn0050479 FBgn0050480
3R	19134278	19154278	1	0.628297	FBgn0038681 FBgn0264916 FBgn0038682 FBgn0261285
2L	16940000	16960000	1	0.62781	FBgn0265543 FBgn0262355
3R	23314278	23334278	1	0.627775	FBgn0267759
3L	4060000	4080000	1	0.626979	FBgn0052259 FBgn0016013 FBgn0000449 FBgn0024179
2L	5620000	5640000	1	0.626502	FBgn0031726 FBgn0266069
3L	4020000	4040000	1	0.625484	FBgn0035483 FBgn0035484 FBgn0045479 FBgn0045478 FBgn0045477 FBgn0052255 FBgn0266402 FBgn0045476 FBgn0035486
2R	18832495	18852495	1	0.624897	FBgn0034399 FBgn0034402 FBgn0034401 FBgn0034398 FBgn0034400
2L	6640000	6660000	1	0.624625	FBgn0031842 FBgn0051633 FBgn0051636
3R	22634278	22654278	1	0.624582
3L	10806900	10826900	1	0.624573	FBgn0262020 FBgn0266782 FBgn0266781
2R	15492495	15512495	1	0.623724	FBgn0050468 FBgn0050469 FBgn0034023 FBgn0050464
2R	22152495	22172495	1	0.623365	FBgn0085235
2R	20632495	20652495	1	0.623351	FBgn0034532 FBgn0250850 FBgn0034534 FBgn0034537 FBgn0061362 FBgn0034535 FBgn0061361
2L	18200000	18220000	1	0.623173	FBgn0051802 FBgn0263332
2R	9372495	9392495	1	0.623149
3L	13206900	13226900	1	0.622298	FBgn0052126 FBgn0052127 FBgn0052128 FBgn0052129 FBgn0266535 FBgn0266537 FBgn0266536 FBgn0264515
3R	28594278	28614278	1	0.621858	FBgn0082974 FBgn0082975 FBgn0082957 FBgn0082960 FBgn0082976 FBgn0082959 FBgn0082958 FBgn0001215 FBgn0039589 FBgn0026400
3R	21814278	21834278	1	0.621597	FBgn0041229 FBgn0267192
2L	4460000	4480000	1	0.62135	FBgn0031610 FBgn0031611 FBgn0011603 FBgn0031609
3R	25334278	25354278	1	0.620834	FBgn0027376 FBgn0028647 FBgn0261575
3R	10894278	10914278	1	0.620782	FBgn0267138 FBgn0267137
2L	7660000	7680000	1	0.62055
3R	20574278	20594278	1	0.620217	FBgn0083039 FBgn0023212 FBgn0267711 FBgn0038811 FBgn0054008 FBgn0038806 FBgn0038808 FBgn0038810 FBgn0014029 FBgn0038805 FBgn0038809
3L	12366900	12386900	1	0.619934	FBgn0267474
3R	15754278	15774278	1	0.619561	FBgn0038356 FBgn0038357
2L	7400000	7420000	1	0.619139	FBgn0267924 FBgn0031907 FBgn0031908 FBgn0031910 FBgn0031909
3L	14286900	14306900	1	0.619079
2R	12872495	12892495	1	0.618035	FBgn0002069 FBgn0263446 FBgn0263445 FBgn0025692 FBgn0033778 FBgn0013305 FBgn0266634
3R	23634278	23654278	1	0.617703
3R	11934278	11954278	1	0.617208	FBgn0051211
2R	17772495	17792495	1	0.617017	FBgn0250851 FBgn0262416 FBgn0026316 FBgn0026309 FBgn0028744 FBgn0028741
3L	2820000	2840000	1	0.616985
2R	15252495	15272495	1	0.616598	FBgn0034005
3R	21014278	21034278	1	0.616472	FBgn0038846 FBgn0026056 FBgn0046763
3R	20914278	20934278	1	0.61633	FBgn0038842
3R	25594278	25614278	1	0.615659
3R	31174278	31194278	1	0.615645
3L	6606900	6626900	1	0.615522	FBgn0266967 FBgn0035708
3R	12114278	12134278	1	0.614811	FBgn0011905 FBgn0037992
3R	24734278	24754278	1	0.614794	FBgn0003719
3L	12306900	12326900	1	0.614432	FBgn0265455
2R	22452495	22472495	1	0.61438
2L	18380000	18400000	1	0.614166
2L	18920000	18940000	1	0.61404
2L	7440000	7460000	1	0.614035	FBgn0025697 FBgn0041247
3R	29454278	29474278	1	0.613626	FBgn0264792
2L	6780000	6800000	1	0.613411	FBgn0051631 FBgn0263585 FBgn0015777
2R	19072495	19092495	1	0.613272
2R	11412495	11432495	1	0.613104	FBgn0040503
2R	20992495	21012495	1	0.612849	FBgn0261394 FBgn0034570 FBgn0050291 FBgn0001133
3R	29634278	29654278	1	0.612568
2R	22392495	22412495	1	0.612523	FBgn0265981 FBgn0053200 FBgn0034725 FBgn0022984 FBgn0034724
3L	12206900	12226900	1	0.61169
3R	11134278	11154278	1	0.61125	FBgn0261291 FBgn0037862 FBgn0040251
3R	13914278	13934278	1	0.611023
2R	21552495	21572495	1	0.610818
3L	6586900	6606900	1	0.610667	FBgn0002926 FBgn0024177
3R	30194278	30214278	1	0.610578	FBgn0000280 FBgn0083047 FBgn0083048 FBgn0083049 FBgn0083050 FBgn0082983 FBgn0000281 FBgn0086664 FBgn0086665 FBgn0039755 FBgn0000276 FBgn0000277 FBgn0000278 FBgn0039757 FBgn0039756 FBgn0000094
3R	10874278	10894278	1	0.610478	FBgn0037853 FBgn0022359 FBgn0037855 FBgn0037850 FBgn0266705 FBgn0037852 FBgn0042094
3R	21354278	21374278	1	0.610387	FBgn0267651 FBgn0267652 FBgn0267648 FBgn0267649 FBgn0267650 FBgn0266178 FBgn0261839 FBgn0266170 FBgn0266171 FBgn0266172 FBgn0266173 FBgn0266174 FBgn0266175 FBgn0266176 FBgn0266177 FBgn0261838 FBgn0261837 FBgn0261841 FBgn0261842 FBgn0261840 FBgn0261843 FBgn0261844 FBgn0261845
3L	4680000	4700000	1	0.610326	FBgn0035568 FBgn0035567 FBgn0042199 FBgn0035569
3R	25154278	25174278	1	0.610299
2L	5680000	5700000	1	0.610019	FBgn0266066 FBgn0266067
3L	8706900	8726900	1	0.609994	FBgn0011509 FBgn0035923 FBgn0264696 FBgn0052022
3R	12014278	12034278	1	0.609872	FBgn0260231 FBgn0260230 FBgn0037980 FBgn0037981 FBgn0051358
3R	20274278	20294278	1	0.609807
3L	3300000	3320000	1	0.609348	FBgn0052279 FBgn0052283 FBgn0052282 FBgn0035434 FBgn0035435 FBgn0035432
3R	14834278	14854278	1	0.609336	FBgn0038266 FBgn0267688
3R	30854278	30874278	1	0.609148	FBgn0039805 FBgn0039806
3L	9806900	9826900	1	0.608376	FBgn0044048
3R	29734278	29754278	1	0.608338	FBgn0039689 FBgn0020235 FBgn0267778 FBgn0039690 FBgn0039691 FBgn0027518 FBgn0027583
2R	18192495	18212495	1	0.608258	FBgn0050114 FBgn0266640
2R	21532495	21552495	1	0.608094	FBgn0069056 FBgn0260477 FBgn0050287 FBgn0050286
2R	21872495	21892495	1	0.608065	FBgn0025573
3R	16134278	16154278	1	0.60675	FBgn0038400 FBgn0038401 FBgn0038402
3R	17654278	17674278	1	0.606696	FBgn0051575 FBgn0051576 FBgn0051577 FBgn0000063 FBgn0266405 FBgn0038533
2R	13072495	13092495	1	0.606648
2L	10100000	10120000	1	0.605975
3R	27634278	27654278	1	0.60596	FBgn0262286 FBgn0027494 FBgn0039531 FBgn0039532
2L	2520000	2540000	1	0.605012	FBgn0264943
2R	21232495	21252495	1	0.604694
2R	15572495	15592495	1	0.604621	FBgn0034033
3R	23954278	23974278	1	0.603985	FBgn0267761 FBgn0039132
3L	6686900	6706900	1	0.603646	FBgn0035710
3L	8966900	8986900	1	0.603522	FBgn0035948 FBgn0035949 FBgn0035947 FBgn0035945 FBgn0263199 FBgn0086706
2L	10360000	10380000	1	0.603369	FBgn0003087 FBgn0032230 FBgn0032231 FBgn0053303 FBgn0041723 FBgn0032233
2R	20152495	20172495	1	0.60315
3R	21934278	21954278	1	0.602929
3L	6326900	6346900	1	0.602315	FBgn0041623
2R	18232495	18252495	1	0.602252	FBgn0265593 FBgn0000658
3R	25174278	25194278	1	0.601739	FBgn0039286
3L	12706900	12726900	1	0.601683
3R	12194278	12214278	1	0.601311	FBgn0051356 FBgn0263404 FBgn0037995 FBgn0037996
3L	3040000	3060000	1	0.601286	FBgn0052485 FBgn0040308 FBgn0052484 FBgn0035392 FBgn0035390 FBgn0035393
3R	24794278	24814278	1	0.60124	FBgn0039228 FBgn0027539 FBgn0039227 FBgn0039226
2R	17812495	17832495	1	0.601212
[truncated: 448 more rows]

## Sheet: Soft Sweep
2L	20820000	20840000	2	0.999995	FBgn0051674 FBgn0032888 FBgn0051673 FBgn0028986 FBgn0032891 FBgn0032889
2L	21880000	21900000	2	0.999993	FBgn0264262 FBgn0032965 FBgn0266902
2L	18280000	18300000	2	0.999993	FBgn0263094 FBgn0263090 FBgn0265904 FBgn0265907 FBgn0032677 FBgn0051787 FBgn0261057
2L	20800000	20820000	2	0.999993	FBgn0067311 FBgn0053322 FBgn0067312
2L	22060000	22080000	2	0.99999	FBgn0051700 FBgn0260996 FBgn0051702
2R	25192477	25212477	2	0.999989
2L	20900000	20920000	2	0.999987	FBgn0053317
2L	20640000	20660000	2	0.999985	FBgn0032869 FBgn0082938 FBgn0082937 FBgn0082936 FBgn0259936 FBgn0051680 FBgn0261787 FBgn0016054 FBgn0261058 FBgn0032870 FBgn0042133 FBgn0032871 FBgn0032873
2L	18300000	18320000	2	0.999984	FBgn0263085 FBgn0265682 FBgn0265905 FBgn0265906 FBgn0263086 FBgn0267285
2L	20560000	20580000	2	0.999979	FBgn0263533 FBgn0266886
2L	22180000	22200000	2	0.999979
2L	20540000	20560000	2	0.999979
2L	19920000	19940000	2	0.999977	FBgn0266693 FBgn0264375
2L	22040000	22060000	2	0.999974	FBgn0267921 FBgn0085202 FBgn0051601
2L	20880000	20900000	2	0.999973
2L	18460000	18480000	2	0.999972	FBgn0262456 FBgn0262406 FBgn0262463
2L	18320000	18340000	2	0.999972
3L	19286900	19306900	2	0.999971	FBgn0267715 FBgn0028380
2L	18480000	18500000	2	0.999971	FBgn0032682
2L	17960000	17980000	2	0.999969	FBgn0032656
2R	25212477	25232477	2	0.999964	FBgn0001325
3L	18326900	18346900	2	0.99996
2L	21900000	21920000	2	0.999959	FBgn0032967 FBgn0051600 FBgn0032966
2L	20860000	20880000	2	0.999958	FBgn0032898 FBgn0032899 FBgn0051675 FBgn0032900 FBgn0266316
2L	19880000	19900000	2	0.999955	FBgn0032827
2L	22080000	22100000	2	0.999954
2L	19280000	19300000	2	0.999946	FBgn0032768
2L	20580000	20600000	2	0.999942
2L	18340000	18360000	2	0.999937	FBgn0011559
2L	20920000	20940000	2	0.999935	FBgn0032908 FBgn0053319 FBgn0053318 FBgn0032907 FBgn0032906
3L	17846900	17866900	2	0.999923	FBgn0036763 FBgn0036764 FBgn0054002 FBgn0036762
2L	20840000	20860000	2	0.999919	FBgn0032896 FBgn0265366 FBgn0051676 FBgn0032894 FBgn0032895
2L	19140000	19160000	2	0.999916	FBgn0266312
2L	22240000	22260000	2	0.9999	FBgn0032988 FBgn0032987
2R	4792495	4812495	2	0.999898
2L	19260000	19280000	2	0.999896	FBgn0265080 FBgn0265079
2R	25172477	25192477	2	0.999895	FBgn0004181 FBgn0011694
2R	25232477	25252477	2	0.999891	FBgn0050429 FBgn0053680
2L	17560000	17580000	2	0.999886	FBgn0262400 FBgn0262398 FBgn0267579 FBgn0266898
2L	17980000	18000000	2	0.999885	FBgn0265992 FBgn0051742 FBgn0032658
2L	20020000	20040000	2	0.999847	FBgn0032839
2L	22100000	22120000	2	0.999816	FBgn0032973 FBgn0040519 FBgn0051703 FBgn0032972
2L	19900000	19920000	2	0.999721	FBgn0262543 FBgn0044811 FBgn0053117
2L	18260000	18280000	2	0.999715	FBgn0266207 FBgn0266206
2L	19940000	19960000	2	0.999703
2L	20940000	20960000	2	0.999687	FBgn0265817
3L	17966900	17986900	2	0.99968	FBgn0267581
2L	17880000	17900000	2	0.999589	FBgn0263339
2R	25132477	25152477	2	0.999574	FBgn0262566
2R	4832495	4852495	2	0.999561
2L	20780000	20800000	2	0.999475	FBgn0250785 FBgn0264995 FBgn0032884
3L	17726900	17746900	2	0.99947	FBgn0036750 FBgn0036749
2L	19760000	19780000	2	0.999459	FBgn0000529 FBgn0032820
2L	20500000	20520000	2	0.999435	FBgn0267266
3L	18346900	18366900	2	0.999412
3L	18766900	18786900	2	0.999396
2L	19340000	19360000	2	0.999362
2L	18400000	18420000	2	0.99931	FBgn0265679 FBgn0265680
2L	20420000	20440000	2	0.999281	FBgn0083031 FBgn0083021 FBgn0083030 FBgn0083020 FBgn0083029 FBgn0032860 FBgn0083022 FBgn0263582
2L	18100000	18120000	2	0.999268	FBgn0032665 FBgn0265669
2L	17260000	17280000	2	0.999212
2L	20980000	21000000	2	0.999205
3L	19266900	19286900	2	0.999159	FBgn0036858 FBgn0036860 FBgn0036861 FBgn0036859
2R	5152495	5172495	2	0.999091
3L	18306900	18326900	2	0.999068
2L	20960000	20980000	2	0.999026
2L	18500000	18520000	2	0.998938	FBgn0032684
2L	18420000	18440000	2	0.998631	FBgn0265681
2R	5252495	5272495	2	0.99861	FBgn0084008
3L	19306900	19326900	2	0.99859
3L	19186900	19206900	2	0.998267
2L	17240000	17260000	2	0.998131	FBgn0265545 FBgn0265546
2L	17920000	17940000	2	0.997991	FBgn0265549
3L	19166900	19186900	2	0.997975	FBgn0267603
2L	18120000	18140000	2	0.997933	FBgn0051785 FBgn0001301
2R	5372495	5392495	2	0.997776
2L	17200000	17220000	2	0.997762
2L	22220000	22240000	2	0.997701	FBgn0264265 FBgn0042701
2L	20620000	20640000	2	0.997511	FBgn0032868 FBgn0262688
2L	18240000	18260000	2	0.997483	FBgn0263325 FBgn0051788 FBgn0263327
2R	5392495	5412495	2	0.997446
2L	19720000	19740000	2	0.997206	FBgn0032815 FBgn0032816
2L	19960000	19980000	2	0.997138	FBgn0263611 FBgn0042129 FBgn0032835 FBgn0014000 FBgn0054051 FBgn0032834 FBgn0262140 FBgn0032836 FBgn0267265
2L	18520000	18540000	2	0.996371	FBgn0266208
2R	25152477	25172477	2	0.996363	FBgn0054038
2L	19360000	19380000	2	0.996331	FBgn0032770 FBgn0032771
2R	4952495	4972495	2	0.995866
3L	17746900	17766900	2	0.995528	FBgn0036751 FBgn0052181 FBgn0043025 FBgn0052182 FBgn0036752
2L	19700000	19720000	2	0.995461
3L	17986900	18006900	2	0.994412	FBgn0086081
2L	21300000	21320000	2	0.993839	FBgn0000370
2L	19800000	19820000	2	0.993433	FBgn0003931 FBgn0043022 FBgn0003923 FBgn0043021 FBgn0003922 FBgn0032824
2R	5112495	5132495	2	0.993158	FBgn0026238 FBgn0262901
2L	22300000	22320000	2	0.993046
2L	17580000	17600000	2	0.992883	FBgn0032652 FBgn0266586 FBgn0266587 FBgn0265583 FBgn0265584 FBgn0032651
3L	22506900	22526900	2	0.99269	FBgn0262182 FBgn0266978
3L	18006900	18026900	2	0.992657
2L	17540000	17560000	2	0.99159	FBgn0032650 FBgn0262996 FBgn0267261
2L	22160000	22180000	2	0.991429	FBgn0032979 FBgn0266044
2R	5132495	5152495	2	0.991231
2L	18220000	18240000	2	0.991031
2L	19320000	19340000	2	0.990604	FBgn0266796 FBgn0267264
2R	4912495	4932495	2	0.990226
2L	17940000	17960000	2	0.98965	FBgn0265547 FBgn0265548
2R	5312495	5332495	2	0.989513
3L	19226900	19246900	2	0.988535	FBgn0264485 FBgn0264484 FBgn0053647
3L	19206900	19226900	2	0.987782
3L	16846900	16866900	2	0.98739	FBgn0036671 FBgn0259794 FBgn0003410 FBgn0003250 FBgn0036670
3R	9154278	9174278	2	0.986107
2L	19040000	19060000	2	0.981434	FBgn0263198 FBgn0032744 FBgn0002022 FBgn0032746 FBgn0261396 FBgn0032748 FBgn0002021
3L	18366900	18386900	2	0.979231
2L	17820000	17840000	2	0.977257
3R	7634278	7654278	2	0.97418
2L	19240000	19260000	2	0.973614
2R	5332495	5352495	2	0.970186	FBgn0033017 FBgn0033019 FBgn0050441
3L	10066900	10086900	2	0.970017
2L	20080000	20100000	2	0.969813	FBgn0032846 FBgn0032848 FBgn0032849 FBgn0032847 FBgn0032845
2L	19780000	19800000	2	0.966941	FBgn0032822 FBgn0004811
3L	17786900	17806900	2	0.964923	FBgn0052187 FBgn0036754 FBgn0052190 FBgn0261998 FBgn0261997
2L	20060000	20080000	2	0.960074	FBgn0019686 FBgn0045064 FBgn0003141 FBgn0032843 FBgn0266212 FBgn0003978
3L	19126900	19146900	2	0.959427	FBgn0052203
2L	19980000	20000000	2	0.957733
2L	17160000	17180000	2	0.957569	FBgn0045487 FBgn0265544 FBgn0085198
2L	17280000	17300000	2	0.956245	FBgn0032631 FBgn0032632 FBgn0267293
2R	5032495	5052495	2	0.956196
2L	22020000	22040000	2	0.954403	FBgn0084001 FBgn0266874
3L	19246900	19266900	2	0.952946	FBgn0267936 FBgn0036853 FBgn0266456 FBgn0026630 FBgn0040075 FBgn0036856 FBgn0259720 FBgn0266737 FBgn0260857 FBgn0017578
2L	19860000	19880000	2	0.950735
2L	18960000	18980000	2	0.950574	FBgn0032728 FBgn0032729 FBgn0032730
2L	17860000	17880000	2	0.950308
2L	20520000	20540000	2	0.948335	FBgn0265256 FBgn0267271
2L	17140000	17160000	2	0.946764
2R	5192495	5212495	2	0.942505
2R	5012495	5032495	2	0.942052
2R	4972495	4992495	2	0.933101
3L	17906900	17926900	2	0.928681	FBgn0036772 FBgn0036771
3L	18026900	18046900	2	0.924806	FBgn0267582 FBgn0052192 FBgn0259739
2R	9832495	9852495	2	0.923423	FBgn0033454 FBgn0023175 FBgn0033450 FBgn0033449 FBgn0033451 FBgn0033453 FBgn0266186 FBgn0023180
3L	15426900	15446900	2	0.914556	FBgn0263616
2L	17900000	17920000	2	0.907691	FBgn0262963 FBgn0262960 FBgn0266872 FBgn0266871
2L	18440000	18460000	2	0.904464	FBgn0032680 FBgn0032679 FBgn0086707 FBgn0261597
2L	18080000	18100000	2	0.90218	FBgn0032664 FBgn0032663 FBgn0002939 FBgn0051741
2R	4852495	4872495	2	0.896244
2R	25092477	25112477	2	0.895965
2R	5472495	5492495	2	0.884037
3L	18046900	18066900	2	0.879782
2R	9892495	9912495	2	0.872606	FBgn0000715 FBgn0033464
2L	18140000	18160000	2	0.863735	FBgn0032668 FBgn0032670 FBgn0265671 FBgn0032669 FBgn0032671
2R	5072495	5092495	2	0.851449	FBgn0263092
2R	4932495	4952495	2	0.847826
2L	20000000	20020000	2	0.845479	FBgn0266213
2L	17840000	17860000	2	0.844015
2L	17220000	17240000	2	0.832562
2L	20380000	20400000	2	0.807824
2L	18060000	18080000	2	0.79554
2L	20280000	20300000	2	0.79397	FBgn0263333 FBgn0040996
2L	20040000	20060000	2	0.778132
2L	22667268	22687268	2	0.769349
3R	10614278	10634278	2	0.756017
3L	17826900	17846900	2	0.750788	FBgn0036759 FBgn0036760 FBgn0052189 FBgn0052188 FBgn0266685 FBgn0036761
2L	18020000	18040000	2	0.732797
3L	17866900	17886900	2	0.726807	FBgn0036767 FBgn0260721 FBgn0036765 FBgn0036766 FBgn0262532 FBgn0262533
3L	19106900	19126900	2	0.696506
2R	5732495	5752495	2	0.659018
2L	17740000	17760000	2	0.613729
3L	15446900	15466900	2	0.581471	FBgn0266944 FBgn0266943
2L	22360000	22380000	2	0.570239
3L	17926900	17946900	2	0.568382	FBgn0267794
2L	20600000	20620000	2	0.552253	FBgn0262425 FBgn0032867 FBgn0262445 FBgn0051677 FBgn0263583
2R	5092495	5112495	2	0.54253
2L	19660000	19680000	2	0.540588
2L	19020000	19040000	2	0.53923	FBgn0032740 FBgn0263838 FBgn0032741 FBgn0051800 FBgn0001202
3L	18286900	18306900	2	0.535625	FBgn0267636 FBgn0267637 FBgn0015946 FBgn0036785 FBgn0036784 FBgn0262998
3L	18266900	18286900	2	0.525476
2L	18040000	18060000	2	0.523776
2L	20480000	20500000	2	0.518561	FBgn0054007 FBgn0262455 FBgn0266901 FBgn0266900 FBgn0266899
3L	19466900	19486900	2	0.508733	FBgn0267714 FBgn0052213 FBgn0036874 FBgn0052208 FBgn0052214 FBgn0262031 FBgn0036872 FBgn0052207 FBgn0036873
3R	31994278	32014278	2	0.50122	FBgn0267116
3L	14006900	14026900	2	0.463286

## Sheet: Balancing
3L	23946900	23966900	3	0.999961
3L	24166900	24186900	3	0.999958
2L	22967268	22987268	3	0.999957
2R	6432495	6452495	3	0.999954
2R	4612495	4632495	3	0.99995	FBgn0267585 FBgn0032997
2L	21380000	21400000	3	0.999949	FBgn0032946
3L	40000	60000	3	0.999946	FBgn0262679
3L	23326900	23346900	3	0.999938	FBgn0263573 FBgn0052230
2L	22987268	23007268	3	0.999937
2R	6412495	6432495	3	0.999931
2L	20220000	20240000	3	0.999927
3L	19806900	19826900	3	0.999924	FBgn0023094 FBgn0036911 FBgn0024889 FBgn0036910
3R	6134278	6154278	3	0.999913
2L	20140000	20160000	3	0.999912
3R	4214278	4234278	3	0.99991	FBgn0037220 FBgn0261436 FBgn0051516
3L	23786900	23806900	3	0.999906
3L	23426900	23446900	3	0.999903
2L	22547268	22567268	3	0.999899	FBgn0040010
2R	5532495	5552495	3	0.999898
2R	4392495	4412495	3	0.999896
3L	23026900	23046900	3	0.99989
3L	22106900	22126900	3	0.999887	FBgn0266771 FBgn0266770
3L	23806900	23826900	3	0.999873
3L	3180000	3200000	3	0.999853	FBgn0260430 FBgn0260026 FBgn0035413 FBgn0035414 FBgn0047135 FBgn0035415 FBgn0052284 FBgn0035412 FBgn0001233
3R	31914278	31934278	3	0.999839
2L	20240000	20260000	3	0.999839	FBgn0259996 FBgn0058172 FBgn0259998 FBgn0250817
2R	5512495	5532495	3	0.999838
3L	24306900	24326900	3	0.999837
3L	18566900	18586900	3	0.999825	FBgn0266984
2R	5632495	5652495	3	0.999803
3L	18546900	18566900	3	0.999803
3L	18486900	18506900	3	0.999791
2R	19712495	19732495	3	0.999788	FBgn0011850 FBgn0053449 FBgn0050449 FBgn0050452 FBgn0050454 FBgn0050218 FBgn0050215 FBgn0050220 FBgn0011848 FBgn0011849 FBgn0053448 FBgn0053445 FBgn0053446 FBgn0053447 FBgn0053450 FBgn0053451 FBgn0053452 FBgn0065076 FBgn0043533 FBgn0034472
2L	22567268	22587268	3	0.999762	FBgn0040011
3R	5974278	5994278	3	0.999759	FBgn0010403 FBgn0266232
2R	4692495	4712495	3	0.999712
3L	260000	280000	3	0.999697	FBgn0083014 FBgn0052845 FBgn0085292 FBgn0029002 FBgn0027111 FBgn0035122 FBgn0035124
3L	18466900	18486900	3	0.999679	FBgn0265883 FBgn0265884 FBgn0028416 FBgn0028415
2R	4592495	4612495	3	0.99962	FBgn0260799
2R	5412495	5432495	3	0.999594
2L	20120000	20140000	3	0.999572	FBgn0032853
2R	9812495	9832495	3	0.999564	FBgn0040093 FBgn0054033 FBgn0040092 FBgn0033447 FBgn0050001
2L	21640000	21660000	3	0.999551	FBgn0262620
2L	15640000	15660000	3	0.999536	FBgn0264990
2L	19680000	19700000	3	0.999495
3L	120000	140000	3	0.999415	FBgn0267455 FBgn0266951 FBgn0266949 FBgn0266950
3R	6074278	6094278	3	0.999384	FBgn0037399
3L	240000	260000	3	0.999262	FBgn0024806 FBgn0035120 FBgn0052476
3L	23386900	23406900	3	0.999171
2L	17180000	17200000	3	0.999145	FBgn0045485 FBgn0046888
3L	19766900	19786900	3	0.999112
2R	6312495	6332495	3	0.999043
3R	7734278	7754278	3	0.998944	FBgn0262899 FBgn0266240 FBgn0037513
3L	13506900	13526900	3	0.998888	FBgn0036376 FBgn0036377 FBgn0086785
2R	9912495	9932495	3	0.99884
2L	18000000	18020000	3	0.998655	FBgn0261357 FBgn0261358 FBgn0032660 FBgn0040989 FBgn0051740 FBgn0265815 FBgn0265816 FBgn0261531
2R	5432495	5452495	3	0.998625
3L	23406900	23426900	3	0.9986
3R	6214278	6234278	3	0.9986	FBgn0037412 FBgn0037411 FBgn0037413
2R	5652495	5672495	3	0.998485	FBgn0033029 FBgn0027507 FBgn0033031 FBgn0267028
3R	6194278	6214278	3	0.998368	FBgn0037410 FBgn0037409
3R	12454278	12474278	3	0.998219	FBgn0038058 FBgn0013277 FBgn0038055 FBgn0038057 FBgn0038056
3L	60000	80000	3	0.998124	FBgn0265703 FBgn0265704 FBgn0262680 FBgn0002564 FBgn0035097 FBgn0264720
3R	6054278	6074278	3	0.99806	FBgn0037398
3L	3160000	3180000	3	0.998023	FBgn0024194 FBgn0035409 FBgn0052278 FBgn0052281 FBgn0035410 FBgn0035407 FBgn0052280
2L	120000	140000	3	0.99794	FBgn0025683 FBgn0266304 FBgn0001142 FBgn0265074 FBgn0265075
3R	5994278	6014278	3	0.997892	FBgn0037395 FBgn0003261 FBgn0266233
2L	19520000	19540000	3	0.997841	FBgn0032800 FBgn0053116 FBgn0051697 FBgn0032803 FBgn0032801 FBgn0032799 FBgn0267011
3L	15366900	15386900	3	0.997839
3R	31854278	31874278	3	0.997705
3L	19786900	19806900	3	0.997345	FBgn0262393 FBgn0261283 FBgn0260874 FBgn0083952 FBgn0036906 FBgn0036908
2R	19752495	19772495	3	0.997171	FBgn0053382 FBgn0053383 FBgn0053388 FBgn0053389 FBgn0053371 FBgn0053355 FBgn0053370 FBgn0053380 FBgn0053381 FBgn0034473 FBgn0053353 FBgn0053354 FBgn0053356 FBgn0053357 FBgn0053358 FBgn0053361 FBgn0053372 FBgn0053375 FBgn0053376 FBgn0053377 FBgn0053386 FBgn0053369 FBgn0053359 FBgn0053385 FBgn0053360 FBgn0053362 FBgn0053364 FBgn0053365 FBgn0053366 FBgn0053363 FBgn0053367 FBgn0053368 FBgn0053373 FBg…
3L	18746900	18766900	3	0.99692	FBgn0267600 FBgn0036813
2L	220000	240000	3	0.996885	FBgn0263465 FBgn0031235 FBgn0265153 FBgn0265152
2R	25012477	25032477	3	0.996775
3L	13766900	13786900	3	0.996578
3L	17046900	17066900	3	0.996567	FBgn0036697 FBgn0036698
2L	20400000	20420000	3	0.996541	FBgn0083038 FBgn0083026 FBgn0083036 FBgn0083025 FBgn0083035 FBgn0083024 FBgn0083034 FBgn0083023 FBgn0083033 FBgn0083037 FBgn0032858
2R	9952495	9972495	3	0.996288	FBgn0033466 FBgn0033469 FBgn0027619 FBgn0033467 FBgn0033468
3L	13786900	13806900	3	0.996239
3L	19406900	19426900	3	0.996234	FBgn0052205 FBgn0053255 FBgn0262027
2L	20300000	20320000	3	0.995999	FBgn0263581
3L	13526900	13546900	3	0.995755
2L	140000	160000	3	0.995219	FBgn0031229 FBgn0053635 FBgn0031227 FBgn0031224 FBgn0259818 FBgn0051974
3R	4834278	4854278	3	0.995095
3L	19426900	19446900	3	0.994894	FBgn0053062 FBgn0267296
2L	15720000	15740000	3	0.994877
3R	7674278	7694278	3	0.994819
3L	280000	300000	3	0.994414
3L	300000	320000	3	0.993481	FBgn0085293 FBgn0004373
2L	17100000	17120000	3	0.993098	FBgn0267004
2L	21000000	21020000	3	0.993066
2R	6292495	6312495	3	0.992904
3R	32014278	32034278	3	0.992743	FBgn0267117
3R	31514278	31534278	3	0.992573	FBgn0267133
3R	12514278	12534278	3	0.99221	FBgn0267680 FBgn0028374
3R	7654278	7674278	3	0.992168
3R	31834278	31854278	3	0.991426
2R	4412495	4432495	3	0.990987
2L	40000	60000	3	0.990769	FBgn0267987
2L	19620000	19640000	3	0.990392
3L	24346900	24366900	3	0.990143
3L	16566900	16586900	3	0.9901	FBgn0250814 FBgn0028693 FBgn0036640 FBgn0036641 FBgn0263975 FBgn0262732
3L	24366900	24386900	3	0.989707
3R	12434278	12454278	3	0.987655	FBgn0038052 FBgn0038051 FBgn0086687 FBgn0043043 FBgn0038054
3L	220000	240000	3	0.986941	FBgn0085482 FBgn0262109 FBgn0262035 FBgn0085483 FBgn0053229
2L	15620000	15640000	3	0.986289	FBgn0028946 FBgn0028945 FBgn0028518
3L	16606900	16626900	3	0.98542	FBgn0017572 FBgn0002284 FBgn0267525 FBgn0025558 FBgn0036648 FBgn0004465
2R	19772495	19792495	3	0.984888	FBgn0034474 FBgn0266766
2L	15740000	15760000	3	0.98438	FBgn0003936 FBgn0001989 FBgn0266309 FBgn0266160 FBgn0001986
3R	31934278	31954278	3	0.983914
2L	19380000	19400000	3	0.982935	FBgn0051798 FBgn0032772 FBgn0032774 FBgn0032773 FBgn0032775
3L	19686900	19706900	3	0.982749	FBgn0261341 FBgn0004623
3L	180000	200000	3	0.981577	FBgn0083992 FBgn0027786 FBgn0035106 FBgn0083976
3L	13846900	13866900	3	0.981521
2L	19160000	19180000	3	0.981128
3R	31474278	31494278	3	0.978978	FBgn0267132
2R	14132495	14152495	3	0.978255	FBgn0262215
2R	19692495	19712495	3	0.978029	FBgn0034468 FBgn0046879 FBgn0046880 FBgn0034470
3R	32054278	32074278	3	0.977421	FBgn0002645
2L	19180000	19200000	3	0.976515	FBgn0267726 FBgn0010309 FBgn0265263 FBgn0010097
2R	9932495	9952495	3	0.976245
3L	6366900	6386900	3	0.976155	FBgn0267642 FBgn0266968
3R	10334278	10354278	3	0.976074	FBgn0037812 FBgn0037811 FBgn0051406
3R	9794278	9814278	3	0.97557	FBgn0037760 FBgn0267819 FBgn0037761 FBgn0264827 FBgn0037759 FBgn0037758
3L	14506900	14526900	3	0.975185	FBgn0036426 FBgn0036427
2R	10132495	10152495	3	0.973949	FBgn0026388 FBgn0263444 FBgn0033490 FBgn0033491
3R	10754278	10774278	3	0.973892	FBgn0037831 FBgn0266371 FBgn0266372 FBgn0051390 FBgn0010421 FBgn0051272
2L	12020000	12040000	3	0.973241	FBgn0010497 FBgn0042126 FBgn0032397 FBgn0265798
3L	5060000	5080000	3	0.972939
3L	6166900	6186900	3	0.972264	FBgn0035689 FBgn0035690 FBgn0262985 FBgn0022699
3L	160000	180000	3	0.972126	FBgn0267456 FBgn0035103 FBgn0035102
3L	140000	160000	3	0.971657	FBgn0263988 FBgn0035099 FBgn0262681
3L	200000	220000	3	0.969997	FBgn0035110 FBgn0035107 FBgn0024945 FBgn0035111 FBgn0063923 FBgn0035112 FBgn0035109 FBgn0025592 FBgn0063924 FBgn0027587
2L	300000	320000	3	0.968969	FBgn0263872 FBgn0031248
3L	80000	100000	3	0.968234	FBgn0040688
3R	8554278	8574278	3	0.966974	FBgn0266916 FBgn0265318 FBgn0051453 FBgn0051460 FBgn0051450
2R	5232495	5252495	3	0.966494
3L	16626900	16646900	3	0.965124
2R	6612495	6632495	3	0.965027	FBgn0053919
2L	240000	260000	3	0.964096	FBgn0262252 FBgn0265149 FBgn0022246
3L	16126900	16146900	3	0.963855	FBgn0036574 FBgn0266724 FBgn0036575 FBgn0011016 FBgn0052152
2R	24972477	24992477	3	0.96259	FBgn0035091 FBgn0035090 FBgn0266787 FBgn0010435
3R	31454278	31474278	3	0.961781	FBgn0039848 FBgn0039849 FBgn0267114 FBgn0267115 FBgn0039850
2R	10612495	10632495	3	0.960581
3L	13546900	13566900	3	0.95972	FBgn0267475 FBgn0266688
3R	21714278	21734278	3	0.959516	FBgn0262542 FBgn0264905
3L	19346900	19366900	3	0.959509
2R	4892495	4912495	3	0.959391	FBgn0264911
3L	6446900	6466900	3	0.955951
2R	24752477	24772477	3	0.953758	FBgn0035056 FBgn0035059 FBgn0040666 FBgn0035057 FBgn0027590
2L	200000	220000	3	0.953454	FBgn0031232 FBgn0031231 FBgn0031233
3R	32034278	32054278	3	0.952981	FBgn0040206 FBgn0039887
3R	8074278	8094278	3	0.952925	FBgn0086052 FBgn0037547 FBgn0265418
3R	29834278	29854278	3	0.952925	FBgn0039707 FBgn0260969
2L	19600000	19620000	3	0.950578	FBgn0266313
3L	7626900	7646900	3	0.950286	FBgn0267526 FBgn0086074 FBgn0035805 FBgn0053276
3L	9426900	9446900	3	0.949804	FBgn0082953 FBgn0267532 FBgn0260431 FBgn0015296 FBgn0040305 FBgn0260859 FBgn0035993 FBgn0005533 FBgn0053926
2R	6512495	6532495	3	0.949611
2R	24172477	24192477	3	0.949357	FBgn0082933 FBgn0082932 FBgn0082935 FBgn0082934 FBgn0026169 FBgn0034986 FBgn0261973 FBgn0261974 FBgn0259937
3R	5614278	5634278	3	0.949023	FBgn0051549 FBgn0051551 FBgn0086051 FBgn0260002 FBgn0037351 FBgn0037350 FBgn0044823
3R	8054278	8074278	3	0.948155
3L	16546900	16566900	3	0.947768	FBgn0036639
2L	160000	180000	3	0.947133
3L	17546900	17566900	3	0.946525	FBgn0086080 FBgn0036738 FBgn0025455
3R	10234278	10254278	3	0.944073
3L	3200000	3220000	3	0.943606	FBgn0053159 FBgn0053160 FBgn0052269 FBgn0052270 FBgn0035420 FBgn0052277 FBgn0052271
3L	18666900	18686900	3	0.942252	FBgn0260027 FBgn0040323 FBgn0052202 FBgn0036804 FBgn0085283 FBgn0040322 FBgn0036805 FBgn0042134 FBgn0036806
3L	6386900	6406900	3	0.940608
3R	16794278	16814278	3	0.939641	FBgn0267314 FBgn0267315
2R	24792477	24812477	3	0.935987	FBgn0035069 FBgn0035068 FBgn0262902 FBgn0023181 FBgn0028738 FBgn0262098
3R	29854278	29874278	3	0.934039	FBgn0051032 FBgn0039714 FBgn0086061 FBgn0065066 FBgn0039712 FBgn0039711 FBgn0039710 FBgn0039713
3R	12534278	12554278	3	0.930187	FBgn0262383
2L	20340000	20360000	3	0.9299	FBgn0086040 FBgn0011638
3L	19666900	19686900	3	0.929404	FBgn0265889
3L	17806900	17826900	3	0.928876	FBgn0261401 FBgn0261402 FBgn0036756 FBgn0036757
3R	31494278	31514278	3	0.926856	FBgn0039851
3L	18426900	18446900	3	0.92599	FBgn0036786 FBgn0267935 FBgn0262969
3L	13566900	13586900	3	0.925434
3L	14486900	14506900	3	0.924982
3R	30354278	30374278	3	0.924856	FBgn0267783
3R	4274278	4294278	3	0.922352	FBgn0267157
2R	5772495	5792495	3	0.920924	FBgn0025693
2L	320000	340000	3	0.920899	FBgn0264086 FBgn0051921 FBgn0053127 FBgn0031249
2R	5492495	5512495	3	0.913935	FBgn0033027
2R	24812477	24832477	3	0.913149
2L	2060000	2080000	3	0.912857
3L	13826900	13846900	3	0.906042	FBgn0275434 FBgn0262813 FBgn0043550 FBgn0036380 FBgn0040812
3L	17566900	17586900	3	0.905673
3L	6146900	6166900	3	0.903772	FBgn0020644 FBgn0020765 FBgn0035686 FBgn0085300 FBgn0035685 FBgn0020645 FBgn0020646 FBgn0042118 FBgn0086900 FBgn0266970 FBgn0035687 FBgn0267308
2L	20260000	20280000	3	0.903523	FBgn0260000
2R	5352495	5372495	3	0.903276	FBgn0033020 FBgn0033021 FBgn0261429
3L	17126900	17146900	3	0.899398
3R	31714278	31734278	3	0.899058
2L	20360000	20380000	3	0.898516	FBgn0026756
2L	60000	80000	3	0.895499	FBgn0266322 FBgn0031213 FBgn0067779 FBgn0031214 FBgn0266879 FBgn0266878
2R	24392477	24412477	3	0.893029	FBgn0002787 FBgn0010414
3R	10274278	10294278	3	0.887688	FBgn0011970
2R	10972495	10992495	3	0.885763
3R	20834278	20854278	3	0.885304	FBgn0262422 FBgn0038832 FBgn0038833 FBgn0038834
3R	10294278	10314278	3	0.885004	FBgn0037807
2L	21940000	21960000	3	0.883588	FBgn0265148 FBgn0266038 FBgn0266039 FBgn0267267 FBgn0267268
3L	17886900	17906900	3	0.880874	FBgn0036768 FBgn0036769
3R	14214278	14234278	3	0.879546	FBgn0038213 FBgn0051326 FBgn0053329 FBgn0027563 FBgn0053109 FBgn0038211
3R	16594278	16614278	3	0.874174	FBgn0038448 FBgn0027109 FBgn0027562 FBgn0038447
2L	4620000	4640000	3	0.873473	FBgn0267008
3L	16146900	16166900	3	0.873368
2L	2140000	2160000	3	0.872812	FBgn0027509 FBgn0031392 FBgn0031393 FBgn0031391
3L	7706900	7726900	3	0.871986	FBgn0035812 FBgn0035811
3L	17066900	17086900	3	0.871734
3L	16646900	16666900	3	0.869723	FBgn0041721 FBgn0267697 FBgn0260960
3R	15574278	15594278	3	0.86763
2R	7212495	7232495	3	0.866175
3R	17534278	17554278	3	0.86393	FBgn0010926 FBgn0038516 FBgn0025571 FBgn0038519
3R	20814278	20834278	3	0.861757	FBgn0083055 FBgn0082986 FBgn0038830 FBgn0038829 FBgn0264839 FBgn0027493 FBgn0051223 FBgn0019936 FBgn0038828
3L	19146900	19166900	3	0.857975
2R	19672495	19692495	3	0.856943	FBgn0040729 FBgn0034467 FBgn0265698 FBgn0085227 FBgn0040730
2L	19300000	19320000	3	0.853617	FBgn0032769
3R	10254278	10274278	3	0.853314	FBgn0040078 FBgn0037802
3R	31434278	31454278	3	0.852633
2R	24772477	24792477	3	0.852001	FBgn0035063 FBgn0035064 FBgn0264876 FBgn0025578 FBgn0086908 FBgn0035065 FBgn0041205
3R	14154278	14174278	3	0.851483	FBgn0051533 FBgn0038210 FBgn0051327
2L	380000	400000	3	0.85078	FBgn0263871
3R	12414278	12434278	3	0.850534	FBgn0086134 FBgn0038045 FBgn0029512 FBgn0038043 FBgn0038042 FBgn0004103 FBgn0038047 FBgn0038046
3L	17766900	17786900	3	0.848442	FBgn0265879
3L	18446900	18466900	3	0.845493	FBgn0036787 FBgn0052196 FBgn0265882 FBgn0265881
2R	5452495	5472495	3	0.845318
3R	20114278	20134278	3	0.844794	FBgn0045471 FBgn0038773
3R	9334278	9354278	3	0.844511	FBgn0262993 FBgn0037680
3R	26534278	26554278	3	0.842509	FBgn0267753
3R	10214278	10234278	3	0.840838	FBgn0037798 FBgn0083943 FBgn0037797
3L	17026900	17046900	3	0.840459	FBgn0036696 FBgn0267320 FBgn0262895 FBgn0036695 FBgn0261872 FBgn0036691 FBgn0036689 FBgn0036690
2L	10900000	10920000	3	0.838993	FBgn0032315 FBgn0032314 FBgn0032313 FBgn0267288
3R	24154278	24174278	3	0.837643	FBgn0026598 FBgn0039158 FBgn0039160 FBgn0039159 FBgn0039157
2L	21080000	21100000	3	0.83688	FBgn0053511 FBgn0053508 FBgn0083972 FBgn0053509 FBgn0053510 FBgn0032913 FBgn0032914
2R	19792495	19812495	3	0.835775	FBgn0011897
2L	12740000	12760000	3	0.835136
3L	8446900	8466900	3	0.832666
2L	640000	660000	3	0.832132
3L	3140000	3160000	3	0.828577	FBgn0035402 FBgn0266582 FBgn0263108 FBgn0035401
3L	18926900	18946900	3	0.823239
3R	15554278	15574278	3	0.822037
2L	6460000	6480000	3	0.821546	FBgn0259749 FBgn0031818 FBgn0031817
2L	4640000	4660000	3	0.821259	FBgn0264342 FBgn0031617 FBgn0031619 FBgn0083938
3R	8854278	8874278	3	0.819366	FBgn0053551 FBgn0011966
3R	9814278	9834278	3	0.818337	FBgn0267440 FBgn0262105 FBgn0085331 FBgn0037765 FBgn0262104 FBgn0037764 FBgn0037763
2R	14052495	14072495	3	0.817405
3L	15326900	15346900	3	0.814471	FBgn0262892 FBgn0264724 FBgn0036494
2L	14680000	14700000	3	0.812681
3L	18726900	18746900	3	0.809366	FBgn0036810 FBgn0036811
3L	16166900	16186900	3	0.802644	FBgn0053795 FBgn0053796 FBgn0267319 FBgn0267318
3R	8874278	8894278	3	0.802216
2R	5172495	5192495	3	0.798962
2R	5052495	5072495	3	0.797583	FBgn0013348
2L	11260000	11280000	3	0.795854	FBgn0040233 FBgn0052831 FBgn0040232
2R	7832495	7852495	3	0.786689
3L	7646900	7666900	3	0.786127	FBgn0035806 FBgn0035807
2R	24212477	24232477	3	0.783388	FBgn0050419
2L	19740000	19760000	3	0.778088	FBgn0032818 FBgn0032817 FBgn0266211
3L	1180000	1200000	3	0.776934	FBgn0004431 FBgn0035186 FBgn0035187 FBgn0040281
2R	7232495	7252495	3	0.774736	FBgn0033153 FBgn0026602 FBgn0026389
2R	6272495	6292495	3	0.773861
3L	9406900	9426900	3	0.773026	FBgn0035988 FBgn0023129 FBgn0035989 FBgn0035987
2L	6400000	6420000	3	0.770704	FBgn0031811
3R	10734278	10754278	3	0.768755	FBgn0004841 FBgn0037828
3R	20134278	20154278	3	0.768274	FBgn0262025
3L	16586900	16606900	3	0.76399	FBgn0003741 FBgn0267555 FBgn0002283 FBgn0052163 FBgn0027500 FBgn0042178 FBgn0036646
3L	11526900	11546900	3	0.7637
3R	16914278	16934278	3	0.760417
3R	29914278	29934278	3	0.7557	FBgn0003356 FBgn0003358 FBgn0003861 FBgn0051202 FBgn0039723 FBgn0051040 FBgn0003357
2L	16100000	16120000	3	0.755524
3L	9486900	9506900	3	0.751847	FBgn0036007 FBgn0052037 FBgn0052036
2L	6380000	6400000	3	0.751223	FBgn0031808 FBgn0259716 FBgn0259715
2L	15600000	15620000	3	0.751162	FBgn0028944 FBgn0266159 FBgn0028947 FBgn0028948 FBgn0028949 FBgn0028950
3L	6426900	6446900	3	0.749531
3L	13746900	13766900	3	0.749102
3L	10086900	10106900	3	0.748559	FBgn0262007 FBgn0052053 FBgn0052054 FBgn0262008
2R	21772495	21792495	3	0.748182	FBgn0034659 FBgn0034660
2R	18392495	18412495	3	0.741869	FBgn0034335 FBgn0064237 FBgn0063498 FBgn0063495 FBgn0063494 FBgn0063493 FBgn0063491 FBgn0063499 FBgn0063496 FBgn0263770 FBgn0263771 FBgn0063497 FBgn0063492
3R	27294278	27314278	3	0.740987
3R	22274278	22294278	3	0.737994	FBgn0262382
3L	13486900	13506900	3	0.735307
3R	23874278	23894278	3	0.732886	FBgn0039124 FBgn0013347
2L	19100000	19120000	3	0.732226	FBgn0032755 FBgn0266210 FBgn0000075 FBgn0002036 FBgn0263982
2R	23952477	23972477	3	0.731476	FBgn0034938 FBgn0034939 FBgn0034942 FBgn0034940 FBgn0034943 FBgn0020764 FBgn0003008 FBgn0034946 FBgn0034945 FBgn0085242 FBgn0029105
3R	11774278	11794278	3	0.724072	FBgn0037949 FBgn0037950 FBgn0267155
2L	6940000	6960000	3	0.717029	FBgn0031871 FBgn0031873 FBgn0031872 FBgn0020616 FBgn0031875 FBgn0031874
3L	19366900	19386900	3	0.715797
3R	8934278	8954278	3	0.71553	FBgn0037643 FBgn0037644 FBgn0003015 FBgn0264790
3L	17526900	17546900	3	0.714205	FBgn0263478 FBgn0259174 FBgn0266675
3L	17686900	17706900	3	0.707388	FBgn0267638
2L	8400000	8420000	3	0.701412	FBgn0032042 FBgn0014417 FBgn0001084 FBgn0020497 FBgn0266326 FBgn0051898
2L	13600000	13620000	3	0.700131	FBgn0262194
3R	9314278	9334278	3	0.698131	FBgn0037675 FBgn0037678 FBgn0037677
3R	25294278	25314278	3	0.693436	FBgn0051097 FBgn0051087 FBgn0051288 FBgn0051370 FBgn0051099 FBgn0039319 FBgn0051436 FBgn0039321
3L	6186900	6206900	3	0.689081	FBgn0035693 FBgn0035691 FBgn0024921 FBgn0035692
3L	18626900	18646900	3	0.685066
3R	19654278	19674278	3	0.684268	FBgn0012003 FBgn0038727 FBgn0003011
2L	720000	740000	3	0.683581	FBgn0011244 FBgn0267993
3R	28514278	28534278	3	0.682041	FBgn0051051
3R	11814278	11834278	3	0.679713	FBgn0019624 FBgn0037955 FBgn0259139
2L	18660000	18680000	3	0.67823	FBgn0086200 FBgn0086681 FBgn0261349 FBgn0263078 FBgn0263079
2R	10572495	10592495	3	0.676692
3R	9634278	9654278	3	0.675214	FBgn0037724 FBgn0263389 FBgn0012344
2R	6452495	6472495	3	0.670816
2R	4992495	5012495	3	0.667999
2R	7852495	7872495	3	0.666922
2L	460000	480000	3	0.665334	FBgn0027592 FBgn0043364
3R	16814278	16834278	3	0.664981
3L	13706900	13726900	3	0.664242
2R	23932477	23952477	3	0.664076	FBgn0034935 FBgn0034937 FBgn0034936 FBgn0001123 FBgn0034933 FBgn0023477
3R	13034278	13054278	3	0.658494	FBgn0266615 FBgn0038114 FBgn0003450 FBgn0038113 FBgn0051157 FBgn0038115 FBgn0001217
3L	19446900	19466900	3	0.655969	FBgn0023395 FBgn0036870 FBgn0266983
2L	4560000	4580000	3	0.654311	FBgn0031613
3R	8434278	8454278	3	0.652781
3R	16894278	16914278	3	0.651093
2R	8732495	8752495	3	0.650249	FBgn0261267 FBgn0265304
3R	11794278	11814278	3	0.649928	FBgn0051116
3L	7526900	7546900	3	0.648936	FBgn0035795 FBgn0052376 FBgn0052374 FBgn0028582
2R	24312477	24332477	3	0.64628	FBgn0266045
2L	20100000	20120000	3	0.64418	FBgn0032851
2R	5692495	5712495	3	0.642548	FBgn0259979 FBgn0259978
3R	29894278	29914278	3	0.640498	FBgn0051036 FBgn0039719 FBgn0039718
3L	18586900	18606900	3	0.639301	FBgn0036791 FBgn0003683 FBgn0266938 FBgn0266939 FBgn0265268
2R	9792495	9812495	3	0.636546	FBgn0033443
2R	19572495	19592495	3	0.632665	FBgn0262170
3R	21734278	21754278	3	0.631438	FBgn0051233 FBgn0038897 FBgn0262144 FBgn0262143 FBgn0261060 FBgn0054034 FBgn0051343
2R	10592495	10612495	3	0.631212
2L	11300000	11320000	3	0.631111	FBgn0263874 FBgn0265794
3L	15586900	15606900	3	0.630409
2R	23352477	23372477	3	0.630275	FBgn0050410 FBgn0050409 FBgn0085452 FBgn0034853 FBgn0034849 FBgn0003977 FBgn0034850 FBgn0085453 FBgn0265053
3R	26054278	26074278	3	0.623364	FBgn0039407 FBgn0039405 FBgn0039408 FBgn0039406 FBgn0260224 FBgn0266255 FBgn0039404 FBgn0039403
3R	12954278	12974278	3	0.622924	FBgn0087021 FBgn0038095 FBgn0038097
2R	7572495	7592495	3	0.621367	FBgn0266623 FBgn0033195 FBgn0004133
2R	8432495	8452495	3	0.616757	FBgn0262316 FBgn0011812 FBgn0002535 FBgn0002534 FBgn0033292 FBgn0014469 FBgn0015034 FBgn0002570 FBgn0002533
3R	22254278	22274278	3	0.616388
2R	18612495	18632495	3	0.608355	FBgn0266671 FBgn0034362 FBgn0034363 FBgn0034365 FBgn0000566 FBgn0034366 FBgn0034364 FBgn0034361 FBgn0034360 FBgn0034368
3L	15886900	15906900	3	0.607371
3R	23794278	23814278	3	0.60384
2L	19120000	19140000	3	0.603656	FBgn0086444 FBgn0086445 FBgn0086446 FBgn0086447 FBgn0086443 FBgn0002031
3R	9254278	9274278	3	0.603147	FBgn0037667 FBgn0037668 FBgn0037671 FBgn0037670 FBgn0037669 FBgn0261241 FBgn0010803 FBgn0037672
3R	16714278	16734278	3	0.598755
3L	3100000	3120000	3	0.598719	FBgn0266437 FBgn0266436
3L	14546900	14566900	3	0.590412	FBgn0028418 FBgn0266117 FBgn0054039
3L	14666900	14686900	3	0.589139	FBgn0011928 FBgn0011927 FBgn0036437 FBgn0262581 FBgn0036436
3L	19326900	19346900	3	0.584836
2R	23972477	23992477	3	0.584186	FBgn0005612 FBgn0034950 FBgn0050178 FBgn0019948 FBgn0034948
3R	10834278	10854278	3	0.581751	FBgn0259740 FBgn0037841
3R	9874278	9894278	3	0.58	FBgn0266389
3R	26074278	26094278	3	0.573492	FBgn0265378
2R	18312495	18332495	3	0.569868
2L	660000	680000	3	0.569296
3R	28714278	28734278	3	0.568409
2R	14112495	14132495	3	0.564937
2L	19540000	19560000	3	0.56336	FBgn0041180 FBgn0032805 FBgn0032804 FBgn0003231
3R	22194278	22214278	3	0.561276	FBgn0266751
2R	9432495	9452495	3	0.554445	FBgn0029092 FBgn0266860
2L	19400000	19420000	3	0.552828	FBgn0065096 FBgn0053533 FBgn0053532 FBgn0016675
2R	19872495	19892495	3	0.551551	FBgn0034477
2R	24012477	24032477	3	0.550889	FBgn0034961 FBgn0034956 FBgn0034957 FBgn0034959 FBgn0011695 FBgn0022708 FBgn0061198 FBgn0034958 FBgn0266889 FBgn0050172
3R	23814278	23834278	3	0.550596	FBgn0004186 FBgn0004187 FBgn0262974
2R	11932495	11952495	3	0.549967
2R	9312495	9332495	3	0.548761	FBgn0262220
3R	14234278	14254278	3	0.546044	FBgn0262983 FBgn0038214
3R	14274278	14294278	3	0.53875	FBgn0267156
3R	27554278	27574278	3	0.537068	FBgn0065105 FBgn0039525
3R	16934278	16954278	3	0.535147	FBgn0278597
2L	4580000	4600000	3	0.530433	FBgn0263869
2L	400000	420000	3	0.52743	FBgn0264855 FBgn0263933 FBgn0031252 FBgn0003278
3R	28794278	28814278	3	0.526556	FBgn0065070 FBgn0005642 FBgn0261289
2R	18632495	18652495	3	0.525025	FBgn0011868 FBgn0050227 FBgn0262595
2R	23872477	23892477	3	0.520462	FBgn0034921 FBgn0025336 FBgn0034920 FBgn0025334 FBgn0020372
2R	21692495	21712495	3	0.519578	FBgn0266346 FBgn0050403 FBgn0265962 FBgn0010228
2L	9920000	9940000	3	0.513745	FBgn0032163 FBgn0266359 FBgn0032161 FBgn0032162 FBgn0259712 FBgn0259713 FBgn0051713 FBgn0051712 FBgn0051876
3R	21474278	21494278	3	0.506856	FBgn0038889
3R	12974278	12994278	3	0.502395	FBgn0041710 FBgn0038099 FBgn0051342 FBgn0038100 FBgn0038102
2R	9512495	9532495	3	0.500882
2R	10112495	10132495	3	0.499795	FBgn0010531 FBgn0033486
3R	15054278	15074278	3	0.492672
3R	8914278	8934278	3	0.492219
3R	20754278	20774278	3	0.487528	FBgn0046689 FBgn0051195
2L	16920000	16940000	3	0.484088
3R	26514278	26534278	3	0.483967	FBgn0266753
3R	16474278	16494278	3	0.48238	FBgn0038437 FBgn0038436 FBgn0004087 FBgn0038438
3L	11946900	11966900	3	0.479696	FBgn0036227 FBgn0036230 FBgn0028573 FBgn0262986 FBgn0036228 FBgn0036229 FBgn0036226
3L	14866900	14886900	3	0.478807	FBgn0265913
3R	22394278	22414278	3	0.477795	FBgn0051162 FBgn0051165 FBgn0051166 FBgn0051167 FBgn0038959 FBgn0038960 FBgn0038961
3R	13094278	13114278	3	0.476681	FBgn0267683
3R	16434278	16454278	3	0.471757	FBgn0038425 FBgn0038427 FBgn0038429 FBgn0044826 FBgn0038428 FBgn0038426
2L	17780000	17800000	3	0.470402	FBgn0263338
3L	18606900	18626900	3	0.467061	FBgn0052200 FBgn0052199 FBgn0259791 FBgn0052201 FBgn0036796 FBgn0013717
3R	13054278	13074278	3	0.457404
2L	12880000	12900000	3	0.455191
2L	20320000	20340000	3	0.450556
3R	16954278	16974278	3	0.446777
2R	15652495	15672495	3	0.442045	FBgn0262403
2L	13800000	13820000	3	0.441018	FBgn0001965 FBgn0027844 FBgn0032533 FBgn0028658 FBgn0028919
3L	16086900	16106900	3	0.434418	FBgn0036568 FBgn0036570 FBgn0036569 FBgn0036567 FBgn0036565 FBgn0262987 FBgn0036566
3L	13686900	13706900	3	0.42122
3L	11966900	11986900	3	0.417419	FBgn0259748 FBgn0053265 FBgn0036232 FBgn0264488
2L	19500000	19520000	3	0.4135	FBgn0263095 FBgn0032797 FBgn0032796
2R	5712495	5732495	3	0.404948
3R	16314278	16334278	3	0.35801	FBgn0011858 FBgn0012011 FBgn0264836 FBgn0038416 FBgn0038415 FBgn0038414
3L	18786900	18806900	3	0.356237
